1                   The genomics of local adaptation in trees:  
2                   Are we out of the woods yet?

3                   Brandon M. Lind\*, Mitra Menon\*, Constance E. Bolte\*<sup>†</sup>,  
4                   Trevor M. Faske<sup>†</sup>, and Andrew J. Eckert<sup>†</sup>

5                   \*Integrative Life Sciences, Virginia Commonwealth University, Richmond, Virginia 23284 USA

6                   <sup>†</sup>Department of Biology, Virginia Commonwealth University, Richmond, Virginia 23284 USA

7                   Dec 14, 2017

8   Running Title: Are we out of the woods yet?

9   Keywords:

10   trees, GWAS, genetic architecture, polygenic local adaptation

## 11 **Abstract**

12 There is substantial interest in uncovering the genetic basis of the traits underlying adaptive  
13 responses in tree species, as this information will ultimately aid conservation and industrial  
14 endeavors across populations, generations, and environments. Fundamentally, the  
15 characterization of such genetic bases is within the context of a genetic architecture, which  
16 describes the multidimensional relationship between genotype and phenotype through the  
17 identification of causative variants, their relative location within a genome, expression,  
18 pleiotropic effect, environmental influence, and degree of dominance, epistasis, and additivity.  
19 Here, we review theory related to polygenic local adaptation and contextualize these  
20 expectations with methods often used to uncover the genetic basis of traits important to tree  
21 conservation and industry. A broad literature survey suggests that most tree traits generally  
22 exhibit considerable heritability, that underlying quantitative genetic variation ( $Q_{ST}$ ) is structured  
23 more so across populations than neutral expectations ( $F_{ST}$ ) in 69% of comparisons across the  
24 literature, and that single-locus associations often exhibit small estimated per-locus effects.  
25 Together, these results suggest differential selection across populations often acts on tree  
26 phenotypes underlain by polygenic architectures consisting of numerous small to moderate  
27 effect loci. Using this synthesis, we highlight the limits of using solely single-locus approaches to  
28 describe underlying genetic architectures and close by addressing hurdles and promising  
29 alternatives towards such goals, remark upon the current state of tree genomics, and identify  
30 future directions for this field. Importantly, we argue, the success of future endeavors should not  
31 be predicated on the shortcomings of past studies and will instead be dependent upon the  
32 application of theory to empiricism, standardized reporting, centralized open-access databases,  
33 and continual input and review of the community's research.

## 34 Table Of Contents

|    |                                                                                                        |           |
|----|--------------------------------------------------------------------------------------------------------|-----------|
| 35 | <b>The genomics of local adaptation in trees: Are we out of the woods yet? .....</b>                   | <b>1</b>  |
| 36 | Keywords: .....                                                                                        | 1         |
| 37 | <b>Abstract .....</b>                                                                                  | <b>2</b>  |
| 38 | <b>Introduction.....</b>                                                                               | <b>4</b>  |
| 39 | <b>Identifying heritable phenotypic variation.....</b>                                                 | <b>7</b>  |
| 40 | <b>Expectations for the loci underlying quantitative traits .....</b>                                  | <b>13</b> |
| 41 | Gene action.....                                                                                       | 15        |
| 42 | Negative selection .....                                                                               | 20        |
| 43 | Positive selection.....                                                                                | 22        |
| 44 | Gene flow .....                                                                                        | 25        |
| 45 | Summary .....                                                                                          | 27        |
| 46 | <b>The genomics of local adaptation in trees.....</b>                                                  | <b>28</b> |
| 47 | Common approaches used to identify adaptive loci .....                                                 | 28        |
| 48 | Current progress in trees .....                                                                        | 29        |
| 49 | Are we out of the woods yet?.....                                                                      | 30        |
| 50 | <b>The Path Forward.....</b>                                                                           | <b>32</b> |
| 51 | Stepping off the path – what’s in our pack? .....                                                      | 33        |
| 52 | At the trail junction – where to next? .....                                                           | 37        |
| 53 | <b>Concluding Remarks .....</b>                                                                        | <b>45</b> |
| 54 | <b>Acknowledgements .....</b>                                                                          | <b>46</b> |
| 55 | <b>References.....</b>                                                                                 | <b>47</b> |
| 56 | <b>Author Contributions .....</b>                                                                      | <b>76</b> |
| 57 | <b>Figures .....</b>                                                                                   | <b>77</b> |
| 58 | Figure 1 .....                                                                                         | 77        |
| 59 | Figure 2 .....                                                                                         | 78        |
| 60 | Figure 3A .....                                                                                        | 79        |
| 61 | Figure 3B.....                                                                                         | 80        |
| 62 | <b>Tables .....</b>                                                                                    | <b>81</b> |
| 63 | Table 1. Where to next? The Path Forward identifies meaningful ways in which we can progress our       |           |
| 64 | understanding of the architecture underlying complex traits in trees. Here we outline some questions   |           |
| 65 | that can be used to guide future inquiry as the number of markers and sequence length increase, and    |           |
| 66 | annotation becomes more precise and specific to tree biology.....                                      | 81        |
| 67 | <b>Boxes .....</b>                                                                                     | <b>82</b> |
| 68 | Box 1: A step in the right direction: Synergism between GWAS and Genomic Selection .....               | 82        |
| 69 | <b>Supplemental Information .....</b>                                                                  | <b>83</b> |
| 70 | <b>The genomics of local adaptation in trees: Are we out of the woods yet? .....</b>                   | <b>83</b> |
| 71 | <b>Supplemental Figures.....</b>                                                                       | <b>84</b> |
| 72 | Figure S1 .....                                                                                        | 84        |
| 73 | Figure S2.....                                                                                         | 85        |
| 74 | Figure S3 .....                                                                                        | 86        |
| 75 | Figure S4.....                                                                                         | 87        |
| 76 | Figure S5 .....                                                                                        | 88        |
| 77 | <b>Supplemental Tables .....</b>                                                                       | <b>89</b> |
| 78 | Table S1 .....                                                                                         | 89        |
| 79 | Table S2 .....                                                                                         | 90        |
| 80 | <b>Boxes .....</b>                                                                                     | <b>91</b> |
| 81 | Supplemental Box S1: Basic Concepts from Quantitative Genetics .....                                   | 91        |
| 82 | Supplemental Box S2: Brief introduction to methods for single-locus genetic association analysis ..... | 92        |
| 83 | <b>Supplemental References .....</b>                                                                   | <b>93</b> |

## 84 **Introduction**

85           Trees are plants with an arborescent habit, which is loosely defined as a tall-statured  
86 growth form usually producing wood (reviewed by Petit & Hampe 2006). Approximately 15% to  
87 25% of plant taxa are classified as trees (Oldfield *et al.* 1998; Grandtner 2005; Wortley &  
88 Scotland 2004), with forested ecosystems accounting for approximately 30% of terrestrial  
89 vegetation (Costanza *et al.* 1997) and providing habitat for terrestrial biodiversity. Indeed, trees  
90 play important ecological roles in diverse communities across the globe, such as vertical  
91 structural habitat, seeds for wildlife forage, forest cover, the production of oxygen, carbon  
92 sequestration, air and water filtration, as well as the reduction of erosion, protracting snowmelt,  
93 and desertification. Of these, biological roles are ultimately defined by a set of life history char-  
94 acteristics common to most tree species (Petit & Hampe 2006. These include predominantly  
95 outcrossing mating systems with high levels of gene flow and fecundities, as well as long  
96 lifespans and generation times (Loehle 1988; Mitton & Williams 2006; Savolainen *et al.* 2007),  
97 although these may differ in, for example, clades of tropical trees. As a result, tree species  
98 typically have large effective population sizes, moderate to high levels of genetic diversity, and  
99 frequent occurrences of locally adapted ecotypes (Savolainen *et al.* 2007; Alberto *et al.* 2013;  
100 Sork *et al.* 2013; Boshier *et al.* 2015; Prunier *et al.* 2015; Holliday *et al.* 2017). Across species,  
101 however, rates of morphological and molecular evolution tend to be slow (reviewed in De La  
102 Torre *et al.* 2017). Additionally, genome size varies enormously across species of trees, ranging  
103 from 0.4Gbp to 31Gbp (reviewed in Neale *et al.* 2017). Recent sequencing efforts in  
104 gymnosperms, which represent the largest tree genomes, reveal that much of genome size  
105 variation is due to transposable element dynamics and gene family evolution (Leitch & Leitch  
106 2012; Morse *et al.* 2009; Nystedt *et al.* 2013; Prunier *et al.* 2015; Neale *et al.* 2017) where  
107 duplication events of select gene families may contribute to the ability of trees to colonize  
108 marginalized habitats (Leitch & Leitch 2012; Prunier *et al.* 2015; Neale *et al.* 2017).

Lind *et al.*: Are we out of the woods yet?

109           In trees, the general presence of large geographical ranges and extensive gene flow  
110 also provides an ideal setting to disentangle neutral from selective evolutionary processes  
111 (Neale & Kremer 2011). Indeed, their longevity and wide and heterogeneous geographical  
112 distributions lend trees suitable for addressing several key evolutionary questions about the  
113 importance of historical climatic fluctuations, and local adaptation involving shifts in allele  
114 frequencies (Lotterhos & Whitlock 2014; Savolainen *et al.* 2007, 2013; Platt *et al.* 2015). As we  
115 detail in subsequent sections, evidence consistent with local adaptation in trees is ubiquitous,  
116 even across fine spatial scales where it had been hypothesized that gene flow may overcome  
117 selection of locally favored alleles (e.g., Mitton *et al.* 1998; Budde *et al.* 2014; Csilléry *et al.*  
118 2014; Vizcaíno-Palomar *et al.* 2014; Eckert *et al.* 2015; Holliday *et al.* 2016; Roschanksi *et al.*  
119 2016; Lind *et al.* 2017).

120           Quantitative phenotypes are often used as a proxy for total lifetime fitness, which is com-  
121 posed of two broad components: survival and reproduction. Since most quantitative traits are  
122 related to some component of total lifetime fitness, they are often used to assess potential for  
123 local adaptation. For many plant taxa, selection pressures are expected to be strongest for vari-  
124 ation in survival during the juvenile stages of development (Donohue *et al.* 2010), particularly for  
125 those taxa with high reproductive output, as is the case for many tree species. As such, juvenile  
126 stages in plants have been found to contribute substantially to total lifetime fitness (Postma &  
127 Agren 2016). Phenotypic traits associated with juvenile survival have thus received the majority  
128 of genetic research focus in trees, particularly due to their long-lived nature. Such studies have  
129 led to intriguing insights gained through a long history of common garden experimentation  
130 (Langlet 1971; Morgenstern 1996). For example, traits such as growth (e.g., height and  
131 diameter), form (e.g. specific gravity, straightness), phenology (e.g. bud flush, bud set), juvenile  
132 performance (e.g. germination rate, seed traits) and physiology (e.g. cold hardiness, water-use  
133 efficiency) have all been shown to be under moderate to high genetic control (reviewed in Corn-  
134 elius 1994, Howe *et al.* 2003, Alberto *et al.* 2013; this review). Variation for these traits is also

135 often partitioned among populations (this review), despite the vast majority of neutral variation  
136 remaining within populations (Howe et al. 2003; Neale & Savolainen 2004). With few exceptions  
137 (e.g., major gene resistance in the white pine-blister rust pathosystem; Kinloch et al. 1970; Liu  
138 et al. 2017), variation for these traits forms a continuum across individuals, thus implying that  
139 the underlying genetic architecture is composed of a large number of small to moderate effect  
140 loci (i.e., a polygenic architecture; concept reviewed in Savolainen et al. 2007, 2013; Gagnaire &  
141 Gaggiotti 2016; Hoban et al. 2016; Timpson et al. 2017). There is some uncertainty, however,  
142 concerning the properties of the effect size distributions comprising polygenic architectures  
143 (*sensu* Fisher 1930, Kimura 1983, and Orr 1998), the relative importance of various forms of  
144 gene actions (e.g., dominance, epistasis) in producing trait variation (Crow 2010, Hansen 2013),  
145 how these interact to affect the evolution of polygenic architectures in natural populations  
146 (Hansen 2006), and how these factors will ultimately influence evolutionary processes and out-  
147 comes in forest trees (Savolainen et al. 2007; Sork et al. 2013; Prunier et al. 2015). Consider-  
148 able strides, made in the past through genotype-phenotype-environment studies (*sensu* Sork et  
149 al. 2013), have contributed intriguing insight into the genomic basis of local adaptation for tree  
150 species. However, given the large genome size of many tree species, such methods have been  
151 criticized as lacking in power and sufficient coverage needed to detect small effect loci, which is  
152 further exacerbated by rapid decay of linkage disequilibrium (LD) in most forest trees (Mackay  
153 2009; Savolainen et al. 2007). Despite these limitations, association studies have been  
154 moderately successful in linking genotypes and phenotypes, including providing information for  
155 making inferences about local adaptation.

156 In this review, we set out to summarize theory related to polygenic local adaptation and,  
157 using these expectations, contextualize the progress of describing the genetic architectures  
158 underlying traits important to conservation and industry in undomesticated tree species. We first  
159 highlight the extensive evidence for local adaptation in trees by reviewing transplant designs  
160 often used in investigations of quantitative genetic differentiation. Using an extensive literature

161 survey across both gymnosperm and angiosperm species, we provide an overview of these  
162 transplant methods, give examples of each, and quantify the distribution of narrow sense herita-  
163 bility and  $Q_{ST}$  estimates across various trait categories. We further use this survey to establish  
164 patterns of comparative quantitative and neutral genetic differentiation (i.e.,  $Q_{ST}$ - $F_{ST}$  tests) which  
165 until this review had not been suitably synthesized in trees. Before we transition into discussing  
166 common methods used to uncover loci underlying adaptation, we establish expectations for the  
167 genetic architecture of polygenic, fitness-related traits by reviewing the theory available to date.  
168 We then provide an extensive review of genotype-phenotype associations in trees and provide  
169 the distribution of the percent phenotypic variance explained by empirically associated loci.  
170 Using this distribution, we underscore the limitations of using solely single-locus approaches to  
171 uncover the loci underlying local adaptation in tree species. Given this synthesis, we highlight  
172 exemplary genomic resources available to fill knowledge gaps, identify promising avenues of  
173 future research, identify key benchmarks and necessary steps towards truly integrating studies  
174 of trees into the genomic era, and address our primary question, “Are we out of the woods yet?”.

## 175 **Identifying heritable phenotypic variation**

176 Trees have evolved numerous adaptations as a result of their vast ecological breadth. As such,  
177 it has long been the goal of forest scientists to understand the traits important to viability and  
178 persistence. Among the most frequent designs used, common gardens and reciprocal  
179 transplants have aimed at describing genetically based differentiation of measured phenotypes  
180 among various source populations of varying sizes and across various geographic scales.  
181 Across these designs, investigators seek to better understand the phenotypes relevant to local  
182 adaptation and the selective pressures influencing these phenotypes. The exact design chosen,  
183 however, is generally based on the questions driving the research endeavor and often by the  
184 availability of resources (Morgenstern 1996; Blanquart et al. 2013; de Villemereuil et al. 2015).  
185 In this section, we briefly review these designs, identify relevant questions and inferences,

186 highlight some of the important practical applications of these techniques, and discuss  
187 examples of past investigations in various tree species.

188         There is a rich history of forest scientists using the common garden approach dating  
189 back hundreds of years (Langlet 1971; Mátyás 1996). In a broad sense, a common garden  
190 design is used to test for differentiation among genetically distinct groups in a homogeneous  
191 environment. These groups can be clonal replicates or sibships (families) derived from species  
192 or hybrids sampled from various populations, provenances, varieties, cultivars, or agricultural  
193 accessions (Cheplick 2015). When individuals from various origins are grown together under the  
194 same conditions, the observed phenotypic differentiation is expected to reflect underlying gen-  
195 etic variation, especially when maternal effects are assumed or shown to be absent. Common  
196 garden and provenance trial designs can also establish evidence that the phenotypes under  
197 study are heritable, a prerequisite for an adaptive response to selective agents (Supplemental  
198 Box S1), and that populations exhibit quantitative genetic differentiation (i.e.,  $Q_{ST}$ ; Spitz 1993).  
199 When driven by questions related to differentiation alone, a single common garden approach  
200 can be used to describe levels of quantitative genetic variation within and among genetically dis-  
201 tinct groups. In these cases, no environmental variables are manipulated, and thus, unequivocal  
202 evidence for trait divergence among groups, and the contributing factors influencing this diver-  
203 gence (e.g., neutral or selective processes), is often limited because conclusions must be based  
204 on *post hoc* inferences about source environments for the materials established in the common  
205 garden. Even so, single common garden approaches can be a powerful tool to demonstrate  
206 evidence congruent with local adaptation. For instance, the white carob tree (*Prosopis alba*  
207 Griseb., Leguminosae) growing in Argentina is an ideal multipurpose tree that has potential for  
208 use in reforestation and afforestation applications in the region. However, this genus is known to  
209 invade other regions, encroach on farmland and waterways, and has a thorny growth habit that  
210 can cause sepsis in livestock. To better understand how forestry applications can balance the  
211 benefits of production and forest protection, Bessega et al. (2015) used a single common



Lind *et al.*: Are we out of the woods yet?

212 garden representing eight provenances of *P. alba* to compare estimates of neutral genetic  
213 patterns to the quantitative genetic variation of life history traits related to economic importance.  
214 They found that for most traits there existed considerable underlying genetic variation ( $\overline{Q_{ST}} =$   
215 0.139). Additionally, source environments were often correlated with measured trait variation in  
216 the common garden, suggesting that the observed differentiation was driven by temperature,  
217 precipitation, wind speed, and sunshine fraction, with signals of divergent selection corroborated  
218 across  $Q_{ST}$ - $F_{ST}$  comparisons and tests for selection (e.g., S test, *sensu* Ovaskainen et al., 2011).  
219 Bessega et al. (2015) concluded that the signal of non-neutral differentiation was indicative of  
220 divergent phenotypic optima across populations, and that this variation could be used to direct  
221 future breeding programs across the region.

222         When there is evidence that environmental differences among source populations may  
223 be driving adaptive divergence, strong environmental candidates can be manipulated (artificially  
224 or via site selection) in a multiple common garden design to further investigate hypotheses of differ-  
225 entiation and adaptation. For instance, the sweet chestnut (*Castanea sativa* Mill., Fagaceae),  
226 also known for its edible fruit, is distributed across much of Minor Asia and southern Europe and  
227 is an ecologically important component of many Mediterranean systems. *Castanea sativa* exhibits  
228 ecological, physiological, morphological, and genetic variability as the range overlays a climatic  
229 transition from xeric Mediterranean conditions to wetter Euro-Siberian environments (see refs in  
230 Lauteri et al., 2004). Previous common garden experiments carried out by Lauteri and col-  
231 leagues have indicated that populations across this transition are further differentiated by water  
232 use efficiency (the ratio of plant carbon gain to water loss) and carbon isotope discrimination,  $\Delta$ .  
233 To further explore variability of drought-related traits, Lauteri et al. (2004) used an *ex situ*  
234 multiple common garden design using two water and temperature treatments in individual  
235 climatic chambers to assess differentiation among six populations across Spain, Italy, and  
236 Greece. They found *treatment* and *population x treatment* effects were significant, suggesting

Lind *et al.*: Are we out of the woods yet?

237 variation in drought adaptation across populations. Additionally, populations originating from dry  
238 sites generally exhibited higher values of  $\Delta$ , which was also composed of significant additive  
239 genetic variation ( $h^2 = 0.15-0.52$ ), and suggests that genetic and physiological mechanisms of  
240 drought adaptation confer a capacity to colonize a wide arrange of environmental conditions,  
241 while strong negative relationships between  $\Delta$  and growth-related traits is suggestive of strong  
242 evolutionary constraints at juvenile stages.

243 While *ex situ* common gardens approaches (e.g., Lauteri et al. 2004) can provide strong  
244 evidence of adaptive divergence among populations, and in some cases corroborate putative  
245 drivers of observed differentiation, these studies can often exclude key environmental factors,  
246 possibly leading to confounding signals of adaptation (Kawecki & Ebert 2004). When *in situ*  
247 experimentation is feasible, site selection can be used to test for environmental drivers of local  
248 adaptation. For example, Evans et al. (2016) investigated traits related to growth and phenology  
249 in juvenile narrowleaf cottonwood (*Populus angustifolia* James, Salicaceae) by planting families  
250 from nine populations across the native range into three common gardens, one each at the  
251 northern, southern, and interior extent of the range. Using  $Q_{ST}-F_{ST}$  comparisons and clinal  
252 analyses alongside the quantitative genetic analyses, Evans et al. (2016) concluded that climate  
253 cues played a major role in structuring adaptive variation across the range of *P. angustifolia*,  
254 and that future industrial and conservation applications should utilize this information to inform  
255 source environments for optimal outcomes.

256 As both *in situ* and *ex situ* common garden trials can include multiple environmental  
257 influences in their design, reciprocally transplanting to all source environments is not necessarily  
258 a requirement to decompose genetic variation underlying adaptive traits or to provide evidence  
259 for, or the drivers of, differentiation among populations. Thus, these designs may preclude  
260 inferences regarding local adaptation *sensu stricto*. To produce such evidence, source  
261 populations can be planted in a (full- or incomplete-factorial) reciprocal transplant design and

Lind *et al.*: Are we out of the woods yet?

262 allow for traits related to fitness to be assessed across native and non-native environments. If a  
263 population is locally adapted, individuals exposed to their native environments should show  
264 increased growth, survival, and reproduction relative to non-native genotypes (Kawecki & Ebert  
265 2004; Leimu & Fischer 2008; Hereford 2009; Savolainen et al. 2013). For example, with the  
266 goal of delineating conservation units based on molecular and quantitative trait differentiation,  
267 Rodríguez-Quilón et al. (2016) used four reciprocally-transplanted common gardens to assess  
268 height and survival of samples from 35 natural populations of maritime pine (*Pinus pinaster*  
269 Aiton, Pinaceae). For both traits,  $Q_{ST}$  was consistently larger than  $F_{ST}$  across the four sites, a  
270 pattern suggestive of divergent selection. Six distinct gene pools based on evolutionary history  
271 of neutral markers were identified, and because high quantitative differentiation ( $Q_{ST}$ ) was found  
272 within these pools, hierarchical analyses were used to further identify ten adaptive population  
273 groups for use in conservation and breeding approaches.

274 Available evidence suggests that many populations of tree species have substantial  
275 heritable genetic variation, and that the quantitative traits under study often show signals of  
276 divergent selection across both broad and fine spatial scales. But how broadly can we apply this  
277 statement? Are there overall patterns of heritability and quantitative genetic structure across  
278 tree species? Because estimates of heritability and  $Q_{ST}$  are often only applicable to a specific  
279 set of populations, for a specific set of environments, at any specific point in time (e.g., see  
280 Figure 2D), a large sample of these estimates is therefore necessary to synthesize the current  
281 literature with regard to patterns across taxa. To accomplish this aim, we synthesized estimates  
282 from 129 published studies with estimates of narrow sense heritability ( $n = 114$ ) from replicated  
283 progeny trials and/or estimates of quantitative genetic differentiation ( $Q_{ST}$ ;  $n = 37$ ). However, we  
284 excluded papers that have been cited for estimates of  $Q_{ST}$  or heritability that were calculated  
285 *post hoc* from variance components (i.e., we only recorded estimates that were explicitly  
286 reported as  $h^2$  or  $Q_{ST}$  in the original publication). For comparison, we further grouped measured

287 traits into 14 broad categories: cold hardiness, disease resistance, drought hardiness, form,  
288 growth, herbivore and insect resistance, leaf and needle properties, phenology, plant secondary  
289 metabolites, reproduction, resource allocation, seed and early germination properties, survival,  
290 and wood properties. Because sample size can influence the precision of both heritability and  
291  $Q_{ST}$ , for each trait category we used a weighted average where weights were equal to the  
292 number of families used to estimate variance components for each estimate of  $h^2$  and  $Q_{ST}$ .

293 In agreement with Cornelius (1994), our survey found that many of the traits important to  
294 conservation and industry exhibit non-zero narrow sense heritability ( $\overline{h^2} = 0.367$ ; File S1;  
295 Figures S1-S4) and are thus amenable to selection. The mean weighted  $Q_{ST}$  across traits  
296 groups from our survey (Table S1; File S1) was between 0.10-0.28, except for drought  
297 hardiness (0.06) and disease resistance (0.04), with median values from the unweighted  
298 distribution generally falling below the weighted average for each trait group (Figure 1). This  
299 suggests that over various geographic and environmental distances, population histories, and  
300 species, there is a general pattern of substantial genetic variation underlying measured traits.  
301 Given our synthesis of  $Q_{ST}$  estimates in trees, we were curious of the evidence for adaptive  
302 divergence among populations ( $Q_{ST} > F_{ST}$ ). Of the 37 articles reporting  $Q_{ST}$  estimates in our  
303 review, 23 compared  $Q_{ST}$  with  $F_{ST}$  or  $G_{ST}$  estimated from the same populations under study  
304 (however, we excluded studies that used  $F_{ST}$  measurements taken from the literature, e.g., as in  
305 McKay & Latta 2002; Alberto et al. 2013). Indeed, as pointed out by Crnokrak & Merilä (2002),  
306 comparisons of  $Q_{ST}$  and  $F_{ST}$  estimated from different populations and/or at different time points  
307 are uninformative. Of these 23 studies, 18 compared  $Q_{ST}$  and  $F_{ST}$  in a statistical framework  
308 while the remaining five studies compared  $Q_{ST}$  and  $F_{ST}$  numerically. Across numerical and  
309 statistical comparisons combined, 67% (254 of 381 traits) exhibited higher  $Q_{ST}$  than  $F_{ST}$ , with  
310 69% (170 of 246 traits) exhibiting significantly higher  $Q_{ST}$  than  $F_{ST}$ . Although we did not tally  
311 instances where  $Q_{ST}$  was reported to be less than  $F_{ST}$  (statistically or otherwise), as this was not

312 the focus of our review, there were some instances in which this was the case. For instance,  
313 Lamy et al. (2011) found such patterns when quantifying population genetic differentiation of  
314 cavitation resistance across the species range of maritime pine (*Pinus pinaster* Aiton,  
315 Pinaceae), while Mahalovich et al. (2011) also found that  $Q_{ST} < F_{ST}$  for traits related to white  
316 pine-blister rust resistance in inoculated seedlings of whitebark pine (*Pinus albicaulis* Engelm.,  
317 Pinaceae). While various explanations for such patterns were outlined by Lamy et al. (2011),  
318 canalization was argued as the most likely process driving the observed patterns, while  
319 Mahalovich et al. (2011) offered similar arguments for selection favoring the same genotype in  
320 different environments (see Lamy et al. 2012 for more regarding this aspect).

321 Despite neutral genetic differentiation partitioned primarily within populations, adaptive  
322 genetic variation seems to be structured to a greater degree across populations, more often  
323 than not, for the various fitness-related traits reviewed here. Such a pattern is indeed consistent  
324 with local adaptation, assuming that (among other considerations such as the recency of  
325 selection) mutation rates are considerably lower than migration rates in these populations  
326 (Whitlock 1999; Hendry 2002; Leinonen et al 2013). In any case, given an extensive literature  
327 supporting the local adaptation hypothesis in trees, our results appear consistent with patterns  
328 of selective forces acting on abundant, heritable genetic variation across populations, even in  
329 the face of gene flow (discussed further in the next section).

### 330 **Expectations for the loci underlying quantitative traits**

331 The homogenous environments of the common garden and reciprocal transplant  
332 designs are ideally suited to test hypotheses of local adaptation in trees (Sork et al. 2013).  
333 However, uncovering the genetic basis and contributory influence of specific loci underlying  
334 these adaptive traits is a sizable endeavor on its own, and the success of such pursuits will be  
335 determined, in part, by the trait's underlying genetic architecture (i.e., the number, effect size,  
336 type, location, expression, pleiotropic effect, environmental influence, and interaction of under-

337 lying loci), which is generally not known *a priori* (Stinchcombe & Hoekstra 2008; Rellstab et al.  
338 2015; Savolainen et al. 2013; Hoban et al. 2016; Burghardt et al. 2017; Wadgyamar et al. 2017).  
339 Much of our early understanding of the architectures of complex traits came shortly after  
340 Nilsson-Ehle (1909) and East (1910) independently demonstrated evidence for multiple-factor  
341 inheritance, where Fisher (1918) laid the groundwork for quantitative genetics by incorporating  
342 the additive properties of variance to partition phenotypic variation into components tractable to  
343 a model of Mendelian inheritance. It was this work, and that of Fisher's geometric model (1930),  
344 which founded the basis for attributing continuous variation of phenotypes to a polygenic model  
345 of many underlying heritable components of mainly small effect. From this model, Fisher (1930)  
346 concluded that mutations of small effect were the main drivers of adaptation, suggesting large-  
347 effect substitutions to contribute little to adaptation due to negative pleiotropic effects  
348 constraining effect size. Therefore, the fate of a given locus would be conditioned on its  
349 average, marginal effect on fitness calculated across the species, with non-additive deviations  
350 from this linear model of inconsequential influence. This micro-mutationist view, to a large  
351 extent, remained the dominant thought for nearly half a century (Orr 2005). It was then that  
352 Kimura (1983) established that for an allele to contribute to adaptation, it would need to survive  
353 the stochastic nature of drift. Thus, new mutations of low frequency and effect were less likely to  
354 contribute substantially to adaptive evolution. Considering the adaptive contribution probability  
355 of large and small effect loci, Kimura concluded that mutations of moderate effect would be the  
356 most plausible. Years later, Orr (1998) showed that over the entire bout of selection via an  
357 adaptive walk, the distribution of fixed substitutions resembles an exponential distribution, with  
358 effect size decreasing with the proximity to the phenotypic optimum. In addition, the distribution  
359 of fitness effects of beneficial mutations is also expected to be exponential (Orr 2003; for more  
360 discussion on this aspect, see also Orr 2006; Eyre-Walker & Keightley 2007; Martin &  
361 Lenormand 2008, Kopp & Hermisson 2009b; Keightley & Eyre-Walker 2010, Dittmar et al. 2016).  
362 Despite major advances in theory and technology, there still remains substantial uncertainty

363 regarding the exact number of loci underlying many adaptive traits, the effect size distribution of  
364 these loci, and how the number of underlying loci and effect distribution may change under  
365 various evolutionary regimes (Orr 2001; Slate 2005; Hansen 2006; Mackay et al. 2009). In this  
366 section, we describe how various factors can contribute to the (perhaps, effective) number of  
367 causative loci, and the distribution of effects underlying continuously distributed adaptive traits,  
368 beginning first with aspects of the architecture itself (gene action), and concluding with  
369 explanations of how various processes (e.g., selection) play an influential role in the evolution of  
370 underlying genetic architectures. Establishing these expectations is essential for assessing  
371 common approaches and guiding future directions. In the next section we then compare these  
372 expectations with methods used in, and results from, genotype-phenotype associations in trees.  
373 While we discuss these examples in isolation, we highlight the fact that the underlying biological  
374 processes are often not independent.

### 375 ***Gene action***

376 The classical genotype-phenotype map is largely one of additive effects, and is  
377 represented by a statistical regression of the phenotype on genetic content, as developed by  
378 Fisher (1918) and extended by others (e.g., Cockerham 1954; Kempthorne 1954). Indeed,  
379 much of the work done in trees has relied on such additive effects to describe heritable and  
380 quantitative genetic variation (see previous section). In this model, the phenotypic variance is  
381 partitioned into orthogonal (i.e., independent) contributions from the genetic variance ( $\sigma_G$ ),  
382 environmental variance ( $\sigma_E$ ), and the variance due to interaction between genotype and  
383 environment ( $\sigma_{G \times E}$ ; Figure 2; see Supplemental Box S1). Further,  $\sigma_G$  is also the sum of  
384 orthogonal variance components, each term representing a different form of gene action. The  
385 additive, dominance, and epistatic terms respectfully designate the associated variance  
386 contribution of independent alleles, the non-additive contribution to variance of interactions  
387 among alleles at the same locus, and the contribution to variance of non-additive interactions

Lind *et al.*: Are we out of the woods yet?

388 among alleles at different loci (the latter of which can take one of many forms such as additive-  
389 by-additive, additive-by-dominance, etc.; Lynch & Walsh 1998). As a result, non-additive gene  
390 action is minimized as non-linear contributions to the overall phenotype (Moreno 1994; Whitlock  
391 et al. 1995) which contributes little to the distinction of the different forms of dominance and  
392 epistasis (Cheverud & Routman 1995; Hansen & Wagner 2001; Hermisson et al. 2003; Hansen  
393 2006; Mackay 2014) nor towards the inference of aspects of the underlying genetic architecture  
394 in general (Nelson et al. 2013; Huang & Mackay 2016).

395         These statistical conveniences afforded by Fisher and others led to the notion that such  
396 non-additive effects were transient (i.e., are due to LD, which will decay with the relaxation of  
397 selection), or that trends of statistical epistasis were representative of functional epistasis in  
398 general, and therefore epistasis was unimportant to evolutionary dynamics (e.g., Bulmer 1980;  
399 Crow 2008, 2010; Hill et al. 2008). While minimized in a statistical regression, this does not  
400 necessarily mean that epistasis and dominance will not have a profound impact on the genetic  
401 architecture, or towards a given population or species' long-term evolutionary trajectory, even if  
402 statistical epistatic or dominance variance is minimal (Goodnight 1988; Chevrud & Routman  
403 1995; Hansen & Wagner 2001; Hansen 2013; Nelson et al. 2013; Griswold 2015; Paixão &  
404 Barton 2016). Indeed, parameterizing a model in which the type I sums of squares is  
405 determined by non-additive parameters, as opposed to additive variance in the conventional  
406 regression model, the majority of genetic variation is still captured by the primary effect in the  
407 model regardless of the underlying architecture (Huang & Mackay 2016). Given the prevalence  
408 of evidence for non-additive contributions (e.g., Phillips 2008; de Visser et al. 2011; see also  
409 references in Hansen 2013), it is likely that non-additive effects will play a role in evolutionary  
410 outcomes. For instance, Huber et al. (2017) showed that the degree of dominance in  
411 *Arabidopsis* is an outcome based upon functional importance and optimal expression level.  
412 Further, Carter et al. (2005) show that, relative to a purely additive trait (or with non-directional  
413 epistasis) under directional selection, positive and negative epistasis can respectfully increase



Lind *et al.*: Are we out of the woods yet?

414 or decrease the additive genetic variance, and thus increase or decrease the rate of phenotypic  
415 response to selection (see also Le Rouzic & Álvarez-Castro 2016). As Jones et al. (2014) show,  
416 for a two-trait phenotype controlled by pleiotropic and epistatic effects, epistasis in the presence  
417 of selection can also affect the mutational architecture of complex traits, where the average  
418 allelic effect evolves to be negatively correlated with the average epistatic coefficient, the  
419 strength of which is greater in larger population sizes. Yet, as described by Barton et al. (2016),  
420 and further discussed by Barton (2017) and Paixão & Barton (2016), the infinitesimal model can  
421 be generalized to include epistatic effects, particularly when the number of underlying loci is  
422 large and selection on individual loci is weak. In the case of non-systematic, weak pairwise  
423 epistasis, and without mutation or environmental noise, the infinitesimal model holds to a good  
424 approximation (Barton et al. 2016). In the case of sparse epistasis with selection and a large  
425 number of loci, the change in the trait mean over 100 generations is greater than that under a  
426 purely additive architecture, and the decrease in additive genetic variance exceeds, to an  
427 extent, that of the neutral case after about 30 generations (which is exacerbated with simpler  
428 architectures), with a reduction of the frequency of segregating alleles with positive effect on the  
429 trait (Barton et al. 2016; Barton 2017).

430         Despite an ongoing debate within the literature (Wright 1932; Whitlock 1995; Crow 2008,  
431 2010; Gibson 2012; Zuk et al. 2012; Hansen 2013; Hemani et al. 2013; Nelson et al. 2013;  
432 Mäki-Tanila & Hill 2014; Ávila et al. 2014; Paixão & Barton 2016), and given that there seems to  
433 be no general prevalence of either positive or negative epistatic interactions (Mackay 2014), the  
434 infinitesimal model is likely to continue to contribute to our understanding of the evolution of  
435 complex traits, as exemplified in its application towards breeding applications (Turelli & Barton  
436 1994) and specifically those successfully applied to trees (Savolainen et al. 2007;  
437 Thavamanikumar et al. 2013; Isik et al. 2015; Grattapaglia 2017). Ultimately, the success of  
438 such models will be conditioned on the context, as well as the distinction between physiological  
439 and statistical gene action. Here, (higher order) non-additive contributions to phenotypic

Lind *et al.*: Are we out of the woods yet?

440 variance will likely have minimal deviations from the limit of the infinitesimal model in the short-  
441 term, particularly if this is primarily due to independent, low-order interactions, and should thus  
442 be applied with this in mind. As such, while short-term evolutionary processes are likely to hold  
443 in this limit, identifying the non-additive loci which underlie the trait, and their respective gene  
444 action, may still need further inquiry (Grattapaglia 2017). Indeed, it is often argued that non-  
445 additive gene action is too often neglected in studies of complex traits (e.g., Carlborg & Haley  
446 2004), possibly due to the large sample sizes required to detect significant interactions, and lack  
447 of statistical power incurred due to multiple hypothesis testing (Mackay 2014). Given the recent  
448 reduced cost of sequencing technology and availability of novel computational and laboratory  
449 tools, future studies incorporating investigations of epistasis and dominance (where appropriate  
450 and feasible) would contribute to our understanding of genetic architectures, quantitative trait  
451 evolution, and breeding applications in trees (Vitezica *et al.* 2017). For example, breeding  
452 applications assessing hybridization across divergent backgrounds, as is also prevalent across  
453 species in nature, have shown the importance of non-additive effects in phenotypic outcomes  
454 (as in *Eucalyptus*, e.g. Tan *et al.* 2017, and *Pinus*, e.g. Dungey 2001). Even so, the additive  
455 model is still a powerful tool to describe the loci underlying adaptive traits.

456 Pleiotropy is another considerable factor influencing the expectations of the genetic  
457 architecture of quantitative traits, its evolution or evolvability, and indeed the genotype-pheno-  
458 type map (Hansen 2003; Orr 2006; Chevin *et al.* 2010b; Tenallion 2014). While multiple defin-  
459 itions exist across the literature (see Paaby & Rockman 2013), pleiotropy is generally identified  
460 as a single locus influencing multiple phenotypic traits. Other than linkage disequilibrium,  
461 pleiotropy is the fundamental cause of genetic covariance among phenotypes (Lande 1980).  
462 Given that the number of independent traits under selection is likely limited (Barton 1990),  
463 pleiotropy likely plays a substantial role in evolutionary dynamics. It is expected that as the  
464 number of traits,  $n$ , influenced by a locus increases, the probability of a beneficial mutation will  
465 decrease with the effect size of a mutation; where the effect size,  $r$ , relative to the distance to

Lind *et al.*: Are we out of the woods yet?

466 the phenotypic optimum,  $d \cdot n^{-1/2}$ , must be (much) less than  $d$  in order to be beneficial (Fisher  
467 1930; the so-called ‘cost of complexity’: Orr 2000). Yet, empirical data seem to contradict this  
468 hypothetical cost, as the effect size of mutations often do not scale with pleiotropy in this way,  
469 and instead increase with the dimensionality of targeted traits (Wagner et al. 2008; Wang et al.  
470 2010). Additionally, universal pleiotropy, where all mutations affect all phenotypes, and where  
471 there is no net directionality of mutations (i.e., mutational isotropy; both aspects as in Fisher  
472 1930), has also been challenged by findings which suggest that only a fraction of phenotypic  
473 traits are affected by pleiotropic loci (Wagner et al. 2008; Wang et al. 2010). Relaxation of such  
474 assumptions from Fisher’s geometric model have shown that the total number of traits affected  
475 by pleiotropy has a relatively decreased effect on the rate of evolution in more general models  
476 (e.g., Martin & Lenormand 2006; see also Simons et al. 2017, and references in Wagner &  
477 Zhang 2011 and Tenailon 2014). It seems that if model organisms (e.g., Pickrell et al. 2016,  
478 Smith 2016) are taken as a bellwether for expectations in trees, pleiotropy is likely a contributing  
479 factor for many quantitative traits. Thus, the fraction of beneficial mutations is likely limited when  
480 the number of traits influenced is large, suggesting that the cost of complexity (or, more  
481 precisely, pleiotropy) may be generally robust (Welch & Waxman 2003), particularly when a  
482 population is close to its phenotypic optimum where selection acts against dimensionality of  
483 pleiotropic effects (Zhang 2012). Thus, the degree of pleiotropy for underlying loci, distance  
484 from phenotypic optima, and covariance among traits under selection can have profound effects  
485 on evolutionary outcomes. This is particularly true for the evolvability of architectures and  
486 distribution of effect sizes, which further depends on the variational autonomy of the traits  
487 affected by pleiotropy and the modularity of mutations, the former of which is ultimately  
488 determined by the direction and size of effect among a set of pleiotropic loci across a set of  
489 characters (see Arnold 1992; Wagner & Altenberg 1996; Hansen 2003, 2006; Wagner et al.  
490 2007; Chevin et al. 2010b; Wagner & Zhang 2011; MacPherson et al. 2015).

491 In many investigations of local adaptation, the primary interest is in trait evolution and

492 thus the underlying genetic components. As such, environmental effects and interactions are  
493 not often pursued, or perhaps even detected (Yoder & Tiffin 2017), particularly in studies of a  
494 single common garden or environment, and are instead treated in much the same way as  
495 epistatic interactions discussed above. Nonetheless, genotypic effects can evolve through  
496 genotype-by-environment interactions with a changing environment just as is the case for the  
497 evolution of non-additive interactions with a changing genetic background (Hansen 2006).  
498 Indeed, it is likely that consistent fluctuations in the environment would select for  
499 environmentally-perceptive responses, which seems to be the case across many tree species  
500 (Li et al. 2017). The contribution to the effect size distribution from GxE interactions will be a  
501 function of the variation in selection across the environments experienced by the interacting  
502 allele(s) as well as the level of gene flow between environments and fitness differences among  
503 various genetic backgrounds, but to our knowledge such information (to the extent of that for  
504 e.g., selective sweeps) is lacking within the literature.

### 505 *Negative selection*

506 Negative selection acts against deleterious mutations that arise within populations. It is  
507 one, but not the only, mechanism that underlies stabilizing selection, defined at the level of the  
508 phenotype where deviations from an optimal value are selected against. Optima in this  
509 framework can be thought of either globally (i.e., across all individuals) or locally (i.e., individuals  
510 within a population), where the latter can have varying optima across populations. The nature of  
511 the optima (i.e., being local or global) affects the detectable trait architecture. For example, trait  
512 architecture should be composed of rare alleles with a negative relationship between effect size  
513 and allele frequency (cf. Eyre-Walker 2010 and references therein), where this relationship can  
514 also be confounded with degree of dominance and gene expression network connectivity  
515 (Huber et al. 2017), under models of a single global optimum. From a population genetic  
516 perspective, the ubiquity of negative selection is encapsulated in the name background

Lind *et al.*: Are we out of the woods yet?

517 selection, which has extensive reviews about its presence in natural systems (Charlesworth  
518 2013), its importance for the neutral and nearly neutral theories of molecular evolution (Ohta  
519 1992, 1996), and its contribution to observable patterns of hitchhiking (Stephan 2010). Important  
520 for the study of polygenic adaptation and its architecture, however, is that loci identified using  
521 GWAS may also include segregating deleterious variation (as argued and hinted at in Eckert et  
522 al. 2013b; cf. Yang et al. 2017; Gazal et al. 2017) as this creates trait variance, with little known  
523 about their prevalence (including differential prevalence across traits), differentiation in  
524 frequencies across populations (but see Zhang et al. 2016), and effects on downstream  
525 inferences about divergent selection pressures across populations. It is sets of GWAS loci,  
526 though, that are currently analyzed for signatures of local adaptation via spatially divergent (i.e.,  
527 locally positive) natural selection (e.g., Berg & Coop 2014).

528         Recent exemplary work with expression networks in *Populus tremula* L. (Salicaceae;  
529 Mähler et al. 2017) and the herbaceous *Capsella grandiflora* Boiss. (Brassicaceae; Josephs et  
530 al. 2015, 2017a) have revealed intriguing insight into the effects of negative selection on the  
531 architecture of complex traits in plants, as well as the relationship between network connectivity  
532 and the strength of negative selection. In *P. tremula*, genes with expression levels that were  
533 significantly associated with sequence variation were found more often in the periphery of the  
534 co-expression network (lower network connectivity) than within network module hubs (higher  
535 connectivity), while expression-associated SNPs were negatively correlated with network  
536 connectivity and effect size, a pattern also found between connectivity and expression variance,  
537 and minor allele frequency and QTL effect size (Mähler et al. 2017). Genes associated with  
538 sequence variation had less skewed site-frequency spectra (i.e., the frequency distribution of  
539 allelic variants) and lower estimates of nonsynonymous to synonymous divergence ( $d_N/d_S$ ) than  
540 genes not associated with sequence variation, together suggesting that genes within the  
541 periphery of co-expression networks are likely under less selective constraint than those genes  
542 with high network connectivity which likely experience greater intensities of purifying selection.

543 These genes thus tend to have more segregating variation and may be those most likely to be  
544 detected with current sample sizes utilized in GWAS, which has implications for estimation of  
545 trait architecture and its ‘degree’ of polygenicity. Even so, while there is prevalent evidence of  
546 negative selection in trees (e.g., Krutovsky & Neale 2005, Palmé et al. 2009, Eckert et al.  
547 2013a,b; De La Torre et al. 2017), more inquiry is needed.

### 548 ***Positive selection***

549 The temporal and spatial heterogeneity of selection can impact the evolution of genetic  
550 architectures underlying adaptation. These impacts are often thought of on a spectrum of trade-  
551 offs, with one end being antagonistic pleiotropy where allelic effects vary between positive and  
552 negative on fitness across populations, and conditional neutrality where allelic effects on fitness  
553 are positive in one or more populations and nearly zero in others (Anderson et al. 2012,  
554 Savolainen et al. 2013). For instance, alleles incorporated into a population after a shift in  
555 environmental influence can increase from low to high frequency via positive selection. The  
556 existence of such a beneficial allele can manifest in several ways: from new mutations,  
557 introgression through gene flow, or molecular reorganization through novel recombination,  
558 inversion, transposition, copy number variation, or insertion-deletion events. If there is strong  
559 selection acting on this allele ( $N_e s \gg 1$ ), it will sweep to high frequency creating a signature of  
560 reduced polymorphism at neutral sites physically linked to the allele (‘genetic hitchhiking’,  
561 Maynard Smith & Haigh 1974) resulting in a hard ‘selective sweep’ (Berry et al. 1991). However,  
562 in structured populations with limited gene flow, this process can take significantly longer to  
563 reach fixation, resulting in incomplete sweeps (Whitlock 2003). Additionally, Pavlidis et al.  
564 (2012) found that, in congruence with Chevin & Hospital (2008), a multilocus genotype often  
565 prevents the trajectories of individual alleles from sweeping to fixation, with an increasing  
566 number of loci leading to decreasing probability of fixation, and as a result, an altered selective  
567 signature at such loci (see also Jain & Stephan 2017). As such, hard selective sweeps in a

Lind *et al.*: Are we out of the woods yet?

568 polygenic architecture are expected to be rare (but not completely absent) under most  
569 circumstances, particularly when the shift in environment causes a relatively small deviation  
570 from the phenotypic optimum. Thus, hard sweeps most likely apply to loci with relatively large  
571 effect above a calculated, context-dependent threshold value (Orr 2005; de Vladar & Barton  
572 2014; Stephan 2015; see specifically Jain & Stephan 2015, 2017).

573 While early literature (Maynard Smith & Haigh 1974; Kaplan et al. 1989) focused on the  
574 rapid sweep of an allele incorporated into a population after an environmental shift, research  
575 within the last few decades have focused on ‘soft sweeps’ resulting from neutral or deleterious  
576 mutations that are present in the standing genetic variation prior to the change in the selective  
577 environment, wherein the selection coefficient changes with the environmental shift such that  
578 the allele(s) become evolutionarily advantageous (reviewed in Hermisson & Pennings 2005,  
579 Barret & Schluter 2008, Messer & Petrov 2013, and Hermisson & Pennings 2017; see also  
580 Jensen 2014). These allele(s) could manifest via a single low-frequency variant, multiple  
581 variants caused by parallel recurrent mutation/reorganization on multiple haplotypes, or multiple  
582 unique alleles that arise independently within, perhaps multiple, populations. In such cases  
583 where selection acts via soft sweeps, the rate of evolution at the phenotypic level is expected to  
584 exceed those of hard sweeps because the alleles under selection have escaped the stochastic  
585 nature of drift to a greater degree and are segregating within multiple individuals and genetic  
586 backgrounds within the population. The extent to which soft sweeps alter the effect size  
587 distributions underlying the genetic architecture is likely dependent upon both the strength of  
588 selection and effect size before and after the environmental change (Messer & Petrov 2013;  
589 Matuszewski et al. 2015; Jain & Stephan 2017), while the frequency before selection influences  
590 the likelihood of subsequent detection (Innan & Kim 2004). Additionally, if multiple mutations are  
591 segregating during the sweep, the probability of fixation for any given locus also decreases  
592 (Pennings & Hermisson 2006a, 2006b; Chevin & Hospital 2008; Ralph & Coop 2010). Evidence  
593 for hard sweeps in tree species exist within the literature, although they are rare (e.g., disease

594 response genes in *Pinus taeda* Ersoz et al. 2010; see also Table 2 in Siol et al. 2010). However,  
595 for many species of trees, which often experience high gene flow and strong diversifying  
596 selection across populations, adaptive divergence for polygenic traits is expected to result more  
597 often from soft sweeps than hard sweeps, affecting phenotypes by subtle allele frequency  
598 changes across populations, such that allele frequency differences of individual loci across  
599 populations for neutral and selective sites will often be nearly indistinguishable (Latta 1998,  
600 2003; Barton 1999; Le Corre & Kremer 2012; Stephan 2015; Yeaman 2015; Jain & Stephan  
601 2015, 2017). Indeed, the large effective population sizes found in most tree species would  
602 permit large effective mutation rates (or reorganization events) necessary for a soft selective  
603 sweep from multiple unique variants, particularly when the phenotype is underlain by a large  
604 mutational target. Even so, and as highlighted by Stephan (2015) and Bailey & Bataillon (2016),  
605 the extent to which scientists can detect the influence of demographic processes on soft versus  
606 hard sweeps, and vice versa, remains challenging (Jensen et al. 2005; Chevin & Hospital 2008;  
607 Schrider et al. 2015, 2016; Schrider & Kern 2016; Hermisson & Pennings 2017).

608         While discrete directional selection events are likely to be a common evolutionary  
609 influence across taxa, fluctuating or sustained directional selection (i.e., moving optima) are also  
610 likely to be contributory factors influencing the genetic architecture of quantitative traits  
611 (reviewed in Kopp & Matuszewski 2013; see also McCandlish & Stoltzfus 2014). For a  
612 sustained moving optimum, the effect size distribution of beneficial alleles is expected to be  
613 dependent upon the effect distribution of standing or *de novo* mutations as well as the strength  
614 of selection: if the rate of change is dramatic, adaptation from new mutations is expected to  
615 occur through intermediate to large-effect loci (Kopp & Hermisson 2009a; Matuszewski et al.  
616 2014) or from small-effect loci when adaptation occurs via standing variation (particularly when  
617 epistasis is considered, Matuszewski et al. 2015). Under lesser rates of environmental change,  
618 adaptation is expected to proceed through mainly alleles of small-effect (Collins et al. 2007;  
619 Kopp & Hermisson 2009a, 2009b) where intermediate effects will dominate the long-term



Lind *et al.*: Are we out of the woods yet?

620 distribution of effect sizes (Kopp & Hermisson 2009b). In the case of fluctuating environments,  
621 outcomes often depend directly on the degree of temporal autocorrelation of the changing  
622 environment. In such cases of stochastic fluctuation around a linear trend of environmental  
623 change, extinction risk increases relative to that of the strictly linear trend (Bürger & Lynch 1995)  
624 where local adaptation lags, to some degree, behind any given contemporaneous scenario. In  
625 comparison, and similar in some ways, stochastic fluctuations around a constant mean are  
626 expected to resemble the dramatic environmental change scenario described above,  
627 characterized by strong selection pressures, maladaptation between generations, and a large  
628 lag load (Bürger 1999; Chevin 2012; Kopp & Matuszewski 2013). In the case of autocorrelated  
629 shifts, the ‘predictability’ of such fluctuations may decrease the possibility of extinction, increase  
630 probability of local adaptation, and lead to similar scenarios as discussed for gradual changes in  
631 the environment (Kopp & Matuszewski 2013).

### 632 *Gene flow*

633 Gene flow, to the extent that would be appreciable to that found in trees (reviewed in  
634 Savolainen et al. 2007), is also an important component shaping quantitative expectations.  
635 Indeed, since the early 1900s we have known that gene flow can disrupt adaptation if selection  
636 is not strong enough to overcome the loss of beneficial alleles (Haldane 1930; Wright 1931; Slatkin  
637 1987; reviewed in Felsenstein 1976, Lenormand 2002, Savolainen et al. 2007, 2013, Feder et  
638 al. 2012a, and Tigano & Friesen 2016). Particularly when gene flow is asymmetric between core  
639 and peripheral populations, adaptation can be inhibited in marginal habitats (Kirkpatrick &  
640 Barton 1997; Kawecki 2008). Even so, there is abundant evidence that gene flow can promote  
641 adaptation and maintain polymorphisms within populations, including white sand lizards  
642 (Laurent et al. 2016), stick insects (Comeault et al. 2014, 2015), cichlid fishes (Meier et al.  
643 2017), Darwin’s finches (Lamichhaney et al. 2015), and lodgepole pine (Yeaman & Jarvis 2006).

644 The magnitude of gene flow between populations can also impact the distribution of

645 effect sizes, for when gene flow falls below a critical threshold, and over many thousands of  
646 generations, there is an increase in the probability of establishment and persistence times of  
647 large-effect alleles, thus reducing the proportion of the polymorphism due to small-effect loci  
648 (Yeaman and Otto 2011; Yeaman and Whitlock 2011). These dynamics are further influenced  
649 by the susceptibility of alleles to 'swamping' (Slatkin 1975; Bürger & Akerman 2011; Lenormand  
650 2002; Yeaman 2015; *sensu* Haldane 1930). For alleles that are prone to swamping, adaptive  
651 phenotypic divergence depends on genetic variation and is driven by allelic covariance among  
652 populations particularly when the underlying architecture is highly polygenic, the mutation rate is  
653 high, and the number of loci underlying the trait exceeds the number needed to achieve the  
654 local optimum phenotype (genetic redundancy; Yeaman 2015). Conversely, when there is little  
655 genetic redundancy underlying the trait, limited divergence is observed unless the effect size of  
656 a given swamping-prone allele exceeds the critical migration threshold. In these cases where  
657 swamping-prone alleles contribute to adaptive divergence, the genetic architecture is transient  
658 and any given locus contributes ephemerally to phenotypic divergence, even for loci of relatively  
659 large effect (Yeaman 2015). In the case of swamping-resistant alleles, the evolved architecture  
660 is enriched for large-effect loci and adaptive divergence can be maintained with little genetic  
661 variation or input from mutation. Yet while the contribution from such loci can last many  
662 thousands of generations, the architecture can again become transient as the genetic  
663 redundancy or mutation rate increases (Yeaman and Whitlock 2011; Yeaman 2015).

664 Physical linkage and reduction of recombination between adaptive loci can also play a  
665 considerable role in adaptive processes in the face of gene flow (Feder & Nosil 2010; Feder et  
666 al. 2012a,b; Yeaman 2013; references therein). In such cases, loci that are tightly linked to other  
667 loci already under selection will have an increased probability of contributing to local adaptation,  
668 both because of physical linkage as well as by reducing the effective recombination among loci  
669 within the sequence block. For instance, Yeaman & Whitlock (2011) showed that under  
670 divergent selection with gene flow, the number of contributing loci decreases with increasing

671 recombination while small effect loci tend to cluster in groups that act as a single large effect  
672 locus (see also Remington 2015), and strong selection can maintain these clusters of linked loci  
673 over greater map distances than can weak selection. More recently, Yeaman (2013) employed  
674 individual-based simulations to provide evidence that the clustering of alleles throughout a bout  
675 of adaptation is unlikely to be driven mainly by divergence hitchhiking alone, and that instead  
676 competition between genetic architectures and chromosomal rearrangements occurring  
677 throughout adaptive processes under a range of environmental fluctuation scenarios can lead to  
678 the evolution of tightly clustered adaptive loci which persist in the event of gene flow, unlike the  
679 clusters identified by Yeaman & Whitlock (2011). Yeaman (2013) found that the level of  
680 clustering was a function of the temporal fluctuation period, the rate of rearrangement itself is an  
681 important determinant on the evolution of clustered architectures, and clusters can in some  
682 cases be evolutionarily disadvantageous. Together, these results suggest that genomic  
683 rearrangements (reviewed in Ortiz-Barrientos et al. 2016), including inversions (Kirkpatrick &  
684 Barton 2006; reviewed in Hoffman & Rieseberg 2008), which decrease the effective rates of  
685 gene flow among adaptive sequences can be an essential component of local adaptation, and  
686 indeed some cases of speciation, in the face of gene flow.

### 687 ***Summary***

688 While we provided an overview of the factors that can influence the genetic architecture  
689 of local adaptation, we acknowledge that it is far from exhaustive. Because the phenotypes  
690 used in studies of local adaptation (particularly those assumed or corroborated to be a compo-  
691 nent of total lifetime fitness) often have a continuous distribution, and are thus quantitative in  
692 nature, the underlying genetic basis for these traits is likely polygenic and is predicted to be  
693 underlain by multiple (often many) segregating loci, many of which may confer small phenotypic  
694 effects (and are thus unlikely to be detected using single-locus approaches). Even so, a contin-  
695 uum exists, where the true genetic architecture (the number of contributing loci, as well as their

Lind *et al.*: Are we out of the woods yet?

696 relative locations within the genome, phenotypic effects, and interactions) underlying a given  
697 complex trait is itself determined by a combination of evolutionary forces that encompass an  
698 interplay between the strength, timing, and direction of (background) selection against the  
699 homogenizing effects of gene flow and recombination, disruptive effects of drift, linkage, trans-  
700 position, inversion, and mutation, interactions between underlying loci as well as between these  
701 loci and the environment, structural variation, relationship to gene expression networks, as well  
702 as other factors related to life history. Consequently, the contemporary genetic architecture is a  
703 result of past evolutionary processes, while the adaptive response to future evolutionary  
704 dynamics is influenced in part by the contemporary architecture and genetic variance at hand.

## 705 **The genomics of local adaptation in trees**

### 706 *Common approaches used to identify adaptive loci*

707 Across taxa, and specifically in trees, the predominant association and outlier methods  
708 for uncovering sets of loci underlying local adaptation have relied upon single-locus population  
709 genetic approaches. Putatively adaptive loci are often identified by elevated allele frequency  
710 differences among populations relative to patterns genome-wide. Yet, as revealed in the  
711 previous section, loci underlying polygenic traits will often be indistinguishable from non-  
712 causative sites in this way. Further, outlier tests based on  $F_{ST}$  (*sensu* Lewontin & Krakaur 1973)  
713 do not incorporate information regarding putative phenotypic targets of selection nor  
714 environmental drivers of differentiation, often do not correct for neutral population structure (but  
715 see Lotterhos & Whitlock 2015), and will inevitably isolate a biased set of candidate loci  
716 (Hermisson 2009; Cruickshank & Hahn 2014). In the case of single-locus genotype-environment  
717 associations (reviewed in Rellstab et al. 2015; see also De Mita et al. 2013), information about  
718 possible environmental drivers is incorporated by assessing the association between allele  
719 frequencies and environmental heterogeneity, yet without information regarding traits  
720 hypothesized to be influenced by selection (Schoville et al. 2012). Single-locus genome wide

721 association studies (see next section; Supplemental Box S2) and quantitative trait loci (QTL)  
722 experiments (reviewed in Ritland et al. 2011, Hall et al. 2016) have also been used in trees,  
723 quantifying the differential effects of typed alleles on a given phenotype. Despite the  
724 shortcomings of these methods, such studies provide candidate loci that can be investigated in  
725 further detail (Tiffin & Ross-Ibarra 2014), which is particularly advantageous when resources are  
726 limited. Indeed, as discussed below, these approaches dominate the methods used to uncover  
727 complex traits (adaptive or otherwise) in trees.

### 728 *Current progress in trees*

729 In light of the expectations outlined above for the architecture of quantitative traits under various  
730 evolutionary regimes, and the methods commonly used to detect these loci, we reviewed the lit-  
731 erature of single-locus genotype-phenotype associations (GPAs, which included associations to  
732 gene expression levels) from studies in forest trees. In doing so, we identified 52 articles across  
733 10 genera and 24 species with a total of 2113 GPAs (Supplemental Table S2, Supplemental  
734 File F2). Because most studies in trees do not report phenotypic effect sizes of individual loci  
735 (i.e., regression coefficients), we report  $r^2$  values which can be used to quantify the percent  
736 phenotypic variance explained by the associated locus. In cases where multiple SNPs from a  
737 given locus (e.g., a gene or scaffold) were associated to a trait, we averaged the  $r^2$  values for  
738 that locus. As with our review of trait heritability and  $Q_{ST}$ , we grouped phenotypic traits used in  
739 associations into twelve broad categories (in this case, no phenotypes fell into Survival or Seed  
740 and Seedling Properties groups). If traits important to tree conservation and industry are often of  
741 a polygenic basis, we would expect small to moderate effects from loci empirically associated to  
742 phenotype. Indeed, across the trait groups considered here, the mean  $r^2$  was 0.039, where  
743 80.79% ( $n = 1707$ ) of recorded estimates had  $r^2$  values less than 0.05, 18.78% ( $n = 397$ ) of  $r^2$   
744 values falling between [0.05,0.22], and nine values of  $r^2$  greater than 0.22, which were all  
745 related to *Cronartium ribicola* resistance in *Pinus monticola* Douglas ex. D. Don (Figure 3).

Lind *et al.*: Are we out of the woods yet?

746           Of the twelve trait groups, all but those traits relating to both reproduction and herbivore  
747 and insect resistance had  $r^2$  estimates greater than 0.10, with traits relating to disease  
748 resistance, growth, leaf and needle properties, phenology, and wood properties each  
749 contributing over 10% of these outliers. These small effects tend to also not account for much of  
750 the observed heritability, but can explain sizeable fractions in some instances (e.g., primary  
751 metabolites in Eckert et al. 2012). Of the loci associated with expression levels,  $r^2$  estimates  
752 were between 0.05 and 0.152 in all but one case ( $n = 54$ ). We also assessed the propensity of  
753 individual loci to be associated to more than one phenotype or expression level across our  
754 literature review. Without correcting for the multiple associations of a locus to yearly phenotypes  
755 (e.g., bud flush 2009, bud flush 2010), we found that the average number of loci associated to  
756 multiple phenotypes per study was 6.94, while after correcting for multiple years the average  
757 number decreased to 5.59. The median number of SNPs utilized for association per study was  
758 206, where 75% (39/52) of studies used less than 1,000 SNPs, eight studies using between  
759 1,000-10,000 SNPs, four studies using between 29,000-35,000 SNPs, and one study utilizing  
760 2,822,609 SNPs for association (all studies with greater than 10,000 SNPs were from either  
761 *Pinus* or *Populus* species).

### 762 *Are we out of the woods yet?*

763 From insight gained from the literature review of genotype-phenotype associations it seems that  
764 the vast majority of the genetic architecture of local adaptation and complex traits in trees remains  
765 largely unexplained using common GWAS methods (see also Box 1), a consistent pattern across  
766 the past decade of research in trees (Neale & Savolainen 2004; Savolainen et al. 2007; Čalić et  
767 al. 2015; Hall et al. 2017). Furthermore, it is likely that the estimates for percent variance  
768 explained are inflated due to a combination of QTLs that break down into smaller effect loci  
769 (Remington 2015), the Beavis effect (Beavis 1994; Xu 2003), and the Winner's Curse (Görning  
770 et al. 2001; Zöllner & Pritchard 2007) where locus effects are inflated by using the same data for

Lind *et al.*: Are we out of the woods yet?

771 both gene identification and phenotypic prediction (see Box 1 in Josephs et al. 2017b for a  
772 detailed synopsis of these biases). Such a pattern suggests that, indeed, many of the traits im-  
773 portant to evolutionary, breeding, and conservation insight in trees are likely of a polygenic basis  
774 and that future studies must take this into account when seeking to identify the underlying loci.

775       Even within studies of model organisms, missing heritability is nothing new. Across taxa,  
776 missing heritability is less frequent within phenotypes of mono- to oligogenic bases (as seen for  
777 the *Cr2* major-gene resistant locus in *Pinus monticola*, Liu et al. 2017), as would be expected,  
778 and is a recurrent, pervasive shortcoming from genotype-phenotype associations of complex  
779 traits, particularly those maintaining single-locus perspectives. A number of explanations have  
780 been put forth to explain the missing heritability, such as epistasis (Hemani et al. 2013) and its  
781 inflationary effect on heritability estimates (Zuk et al. 2012), environmental or epigenetic inter-  
782 actions (Feldman & Lewontin 1975) as well as their inflationary effect on heritability estimates  
783 (Zuk et al. 2012), (unmeasured) low-frequency variants of large effect (Dickson et al. 2010),  
784 genetic or variance heterogeneity of individual alleles (Leiserson et al. 2013; *cf.* Box 1 in Nelson  
785 et al. 2013), or common variants with effect size below detection thresholds (Yang et al. 2010).  
786 As such, here we avoid supporting one causative hypothesis over another, particularly given the  
787 ongoing discussion within the literature, for which strengths and weakness for any viewpoint are  
788 apparent (e.g., Gibson et al. 2010), and because of the progress yet to be made in trees.

789       Indeed, the dissection of the genetic architectures underlying complex traits in trees is  
790 still in its nascency compared to the progress of model organisms (for which missing heritability  
791 is still an issue), and beyond issues of coverage, genomic saturation, and genomic resources  
792 (discussed below in The Path Forward), we must approach this issue with all possibilities in  
793 mind. Given the unique properties of the life histories, genome size and organization of many  
794 tree species, and the limited numbers of studies with large sets of molecular markers, causative  
795 sources of the missing heritability should be ruled out, or supported, as with any other  
796 hypothesis, particularly as we gain information from contemporary studies of trees that address

Lind *et al.*: Are we out of the woods yet?

797 shortcomings of those in the past. Further, we must keep in mind differences between functional  
798 and statistical gene action (Álvarez-Castro *et al.* 2007; Nelson *et al.* 2013; Huang & Mackay  
799 2016; Huber *et al.* 2017). In any case, it seems that sample sizes of single-locus approaches  
800 will need to be increased (Hall *et al.* 2016), albeit with diminishing returns (Boyle *et al.* 2017;  
801 Simons *et al.* 2017), to discover a higher proportion of the underlying loci in trees due to small to  
802 moderate additive effects. Alongside suggestions outlined in *The Path Forward*, incorporating  
803 investigations into such aspects of epistasis, dominance, pleiotropy, GxE effects, and network  
804 analyses (when appropriate), may be a worthwhile complement (e.g., Lotterhos *et al.* 2017,  
805 Mähler *et al.* 2017, Mizrahi *et al.* 2017; Tan *et al.* 2017).

806 While the infinitesimal model will continue to prove to be immensely useful for breeding  
807 programs and for short-term evolutionary predictions, and we may find that the missing  
808 heritability in trees is truly due to consequences of the infinitesimal regime (as is often cited to  
809 be the majority consensus across taxa for missing heritability), it has been argued that the  
810 analysis paradigm for such studies is near its limits in describing the functional genetic  
811 architecture of quantitative traits, and that it is therefore necessary to move beyond single-locus  
812 perspectives and reconsider common practices (Pritchard & Di Rienzo 2010; Nelson *et al.* 2013;  
813 Sork *et al.* 2013; Tiffin & Ross-Ibarra 2014; Wadgyamar *et al.* 2017). At this stage, it seems that  
814 we investigators seeking to describe the genetic architecture of quantitative traits in trees have  
815 some ways yet to go before we are truly out of the woods. In the next section, we describe the  
816 path forward to describing genetic architectures from a polygenic and functional perspective,  
817 identify resources available to advance our knowledge and fill knowledge gaps, as well as future  
818 directions for this research area.

## 819 **The Path Forward**

820 As we have outlined, there is still ample room for improvement in our description and  
821 understanding of the genetic architecture of quantitative traits in trees (see Table 1 and Box 1).



Lind *et al.*: Are we out of the woods yet?

822 Importantly, methods used to uncover causative loci should take into consideration the expected  
823 degree of polygenicity, the relative contributions of various forms of gene action, as well as how  
824 past evolutionary phenomena has likely shaped current adaptive expectations. In this section,  
825 we orient our path forward by first highlighting utilities available to, and underused within, the  
826 forest genetics community to describe the genetic architecture of complex traits. We then outline  
827 several suggestions to facilitate further progress and advocate for prospective perspectives in  
828 future studies such that information and data may continue to be used easily in subsequent  
829 syntheses across pathways, environments, species, and towards insight to identify future  
830 needed resources as our understanding progresses. While our recommendations are specific to  
831 the tree community, we also acknowledge other valuable recommendations from recent reviews  
832 (e.g., Savolainen et al. 2013; Tiffin & Ross-Ibarra 2014; Lotterhos & Whitlock 2015; Gagnaire &  
833 Gaggiotti 2016; Hoban et al. 2016; Wellenreuther et al. 2016; Burghardt et al. 2017; Wadgymar  
834 et al. 2017).

### 835 *Stepping off the path – what’s in our pack?*

836 The genetic architecture underlying local adaptation and complex traits likely has a  
837 polygenic basis composed of many loci of relatively weak effect yet many of the common  
838 association or outlier methods will often fail to detect many of the causative loci of small to  
839 moderate influence. Such investigations have so far led to an incomplete description of studied  
840 architectures, and, in many cases, have limited our understanding of complex traits in trees to a  
841 handful of loci. While we do not advocate that such single-locus methods be avoided in future  
842 studies (considered further in the next section), here we outline underused and promising  
843 approaches to identify and describe underlying loci that explicitly take into account the polygenic  
844 basis of such traits and may help advance our understanding in future studies, including some  
845 of the questions we have outlined in Table 1. Multivariate, multiple regression, and machine  
846 learning techniques are three such examples, and differ from univariate analyses by analyzing

Lind *et al.*: Are we out of the woods yet?

847 patterns among multiple loci simultaneously.

848         The Bayesian sparse linear mixed model (BSLMM), for instance, such as that deployed  
849 in the software package `GEMMA` (Zhou et al. 2013), is developed for both genomic prediction (see  
850 also Box 1) and mapping of complex traits that offers considerable advantages over single-locus  
851 genotype-phenotype approaches (Guan & Stephens 2011; Ehret et al. 2012; Zhou et al. 2013;  
852 Moser et al. 2015). This analysis has gained in popularity recently, being used across diverse  
853 taxa such as stick insects (Comeault et al. 2015, Riesch et al. 2017), butterflies (Gompert et al.  
854 2015), Darwin's finches (Chaves et al. 2016), and trees (Lind et al. 2017). BSLMM is a hybrid of  
855 LMM and Bayesian variable regression that extends the Lande & Arnold (1983) multiple  
856 regression approach in an attempt to address the sparsity of common data sets used in  
857 genotype associations, where the number of model parameters (loci) is often much greater than  
858 the number of observations (sampled individuals; Zhou et al. 2013; Gompert et al. 2016).  
859 Specifically, the model takes into account relatedness among individuals and provides a means  
860 to summarize estimates of selection across the genome such as the proportion of phenotypic  
861 variation explained (PVE) across genotyped markers by estimating the combined influence of  
862 markers with either polygenic (infinitesimal) or measurable (moderate to large) effect, the  
863 proportion of PVE explained by genetic loci with measurable effects (PGE), and the number of  
864 loci with measurable effects that underlie the trait (for more details see Guan & Stephens 2011;  
865 Zhou et al. 2014; Gompert et al. 2016). Additionally, `GEMMA` returns the posterior inclusion  
866 probability for each marker providing evidence for association with the phenotype. While the  
867 approach remains promising considering its performance in the context of genomic prediction  
868 and inference of PVE (e.g., Zhou et al. 2013, Speed & Balding 2014), there has been no  
869 attempts, to our knowledge, to assess the approach under various demographic histories,  
870 genetic architectures, and sampling designs. A close approximation to this comes from analyses  
871 carried out by Gompert et al. (2016), in which `GEMMA` was evaluated for PVE estimation,

Lind *et al.*: Are we out of the woods yet?

872 estimated effects of causative loci, and the estimated number of underlying SNPs based on  
873 various author-specified numbers of causal loci, underlying heritability ranges, and numbers of  
874 sampled individuals. In short, the authors convey that GEMMA is promising, but that there are  
875 important limitations to consider (Gompert et al. 2016). However, because the authors simulated  
876 architectures by randomly assigning effects to loci from an empirically-derived sequence data  
877 set, and while they were thorough in their data exploration, we encourage these results be  
878 replicated *in silico* through full modeling of genomic loci across various demographic, LD,  
879 sampling, and architecture scenarios to ensure underlying allele frequencies among populations  
880 and LD (within and among populations) reflect realistic patterns which may have an effect on  
881 model performance. Such additional analyses will also allow for more specific insight into model  
882 performance based on *a priori* biological insight available to investigators, allowing more  
883 informed decisions when choosing an appropriate genotype-phenotype association method  
884 such as BSLMM.

885 Random Forests (Breiman et al. 2001) is a machine learning algorithm used to identify  
886 patterns in highly dimensional data sets to further generate predictive models. Alongside uses  
887 outside of evolutionary biology, the Random Forests algorithm has gained popularity in  
888 association studies across taxa as well as in trees such as that of genotype-phenotype  
889 associations in Sitka spruce (*Picea sitchensis*; Holliday et al. 2012) and genotype-environment  
890 associations in white spruce (*P. glauca*; Hornoy et al. 2015). Random Forests is based upon  
891 classification (for discrete variables, e.g., soil type) and regression (continuous variables; e.g.,  
892 temperature or phenotypic measurements) trees (so-called CART models). During its  
893 implementation, Random Forests creates these decision trees using two layers of stochasticity:  
894 the first layer is used to grow each tree by using a bootstrap sample of observations  
895 (environmental or phenotypic) while the second uses a random subset of predictors (marker  
896 loci) to create a node which is then split based on the best split of the observations across  
897 permutations of predictors using the residual mean square error (see Figure 2 in Hornoy et al.

898 2015). The observations that were not used as training data to create the model are then used  
899 to estimate model accuracy, which can be further used to assess variable importance (Holliday  
900 et al. 2012; Hornoy et al. 2015; Forester et al. 2017).

901 While creating a promising alternative to univariate approaches, until recently the  
902 Random Forests algorithm has not been fully explored to assess model performance for use in  
903 association studies. Forester et al. (2017) provide a thorough analytical assessment using  
904 simulated data to remark on performance for use in genotype-environment association studies  
905 (GEA). In their analysis, they used published simulations of multilocus selection (Lotterhos &  
906 Whitlock 2014, 2015) of various demographic histories and selection intensities across 100  
907 causative (with 9900 neutral) loci to compare the Random Forests algorithm to the multivariate  
908 approaches of constrained ordination (redundancy analysis, RDA, and distance-based RDA,  
909 dbRDA - both of which are mechanistically described in Legendre & Legendre 2012, but are  
910 multivariate analogs of multiple regression on raw or distance-based data) and to the univariate  
911 latent factor mixed model (LFMM). In short, Forester et al. (2017) found that LFMM performed  
912 better than Random Forests as a GEA, while constrained ordinations resulted in relatively lower  
913 false positive and higher true positive rates across levels of selection than both Random Forests  
914 and LFMM. Additionally, the authors found that correction for population structure had little  
915 influence on true and false positive rates of ordination methods, but considerably reduced true  
916 positive rates of Random Forests. They also note that further testing is needed across various  
917 evolutionary scenarios. Even so, constrained ordination provides an effective means by which to  
918 detect loci under a range of both strong and weak selection (Forester et al. 2017). While  
919 promising under a GEA framework, future analyses may provide evidence that such methods  
920 also perform well in genotype-phenotype associations as well. Empirically, it has been used in  
921 trees to explore multivariate relationships between phenotypes, genotypes, and environments  
922 (e.g., Sork et al. 2016). Additionally, there have been many extensions of the original Random  
923 Forests model, such that extensions with purportedly better performance should be assessed

924 alongside other popular association methods in the future.

925         Once a set of candidate loci have been identified to putatively underlie a phenotype or  
926 environment of interest, these loci can be used to further test the hypothesis of polygenic local  
927 adaptation. For instance, Berg & Coop (2014) use the significant hits from GWAS data sets to  
928 estimate within-population additive genetic values by calculating the frequency-weighted sum of  
929 effects across these loci. These values are then compared to a null model of genetic drift that  
930 accounts for population structure to test for an excess of variance among populations, ultimately  
931 identifying the populations most strongly contributing to this signal. The excess variance statistic  
932 ( $Q_x$ ) is analogous to  $Q_{ST}$  and is composed of two quantities – an  $F_{ST}$ -like component describing  
933 allele frequency differentiation across populations and a LD-like component describing  
934 coordinated and subtle allele frequency shifts across populations. This method thus allows  
935 explicit hypothesis tests related to the expected polygenic architecture of local adaptation  
936 across populations of trees. It is also noteworthy in that it combines aspects of the genotype-  
937 environment-phenotypic spectrum that underlies local adaptation within a single methodological  
938 framework (cf. Sork et al. 2013). Prior attempts take a pairwise approach examining each  
939 pairwise combination of the genotype-environment-phenotype spectrum (e.g., Eckert et al.  
940 2015). Despite the promising insight from this method, it has not been used widely outside of  
941 model organisms. Future applications in trees should consider the number of causal loci  
942 identified to be associated with quantitative phenotypes (driven somewhat by the number of loci  
943 used in mapping studies), the number of populations needed to increase power, especially in  
944 the correlation of genetic values to environmental data, and the ability to reliably estimate  
945 genotypic effects.

#### 946 ***At the trail junction – where to next?***

947         While we have outlined methods above that have not yet realized their full potential in  
948 describing genetic architecture of complex traits in trees, there are several matters that we, as a

949 field, must keep in mind such that we can continue to progress our understanding in the most  
950 efficient manner. Here we believe the path forward lies in three critical areas which we discuss  
951 in further detail below: 1) needed data, 2) standardized data reporting, and 3) empirical studies  
952 in trees designed to test theoretical expectations of genetic architectures.

### 953 *Needed data*

954 While the common garden approach can facilitate understanding of evolutionary  
955 processes without specifically identifying underlying loci (Rausher & Delph 2015), identifying  
956 features of the genetic architecture will ultimately inform breeding applications important to  
957 management, conservation, and industry, and thus requires knowledge about underlying loci.  
958 Consequently, we have not yet had sufficient sampling of both marker densities and studies  
959 amenable to replication across systems to truly exhaust the use of single-locus approaches,  
960 particularly as the sample size of markers, individuals, and populations increase in the near  
961 future. Indeed, Hall et al. (2016) estimated that the number of causative loci underlying  
962 quantitative traits in trees is likely in the several hundreds, and to capture 50% of the heritable  
963 genetic variation using single-locus approaches, population sizes of about 200 will be needed  
964 for mapping disease traits, and about 25,000 for traits such as growth. Even so, we recommend  
965 that such single-locus associations should not be used as the sole method of architecture  
966 description as we carry out future studies unless justified *a priori* based on biological principles,  
967 knowledge of the expected architecture, and/or for testing specific hypotheses. While the limits  
968 of such methods should be considered, these approaches can be used alongside other lines of  
969 evidence to either support or spur further testing of underlying loci (*sensu* Sork et al. 2013). For  
970 instance, there is little downside to performing both a single-locus association and a multivariate  
971 analysis in the same study, even if some or all of the results for a given technique are excluded  
972 to the supplement (e.g., Sork et al. 2016). Further, contextualizing genotype-phenotype and  
973 genotype-environment relationships with results that describe local adaptation (e.g., phenotype-

974 environment,  $Q_{ST}$ - $F_{ST}$  comparisons) can also stimulate further understanding particularly for data  
975 that is made publically available for future synthesis. Specifically, studies which do so within the  
976 context of comparisons within and across species (e.g., Yeaman et al. 2016) or environments  
977 (Holliday et al. 2016), offer unique circumstances under which to advance our understanding of  
978 complex traits in trees (Table 1; Lotterhos & Whitlock 2015; Čalić et al. 2016; Hoban et al. 2016;  
979 Ingvarsson et al. 2016; Mahler et al. 2017).

980 Isozymes (Adams & Joly 1980), restriction fragment length polymorphisms (Devey et al.  
981 1994), randomly amplified DNA (Grattapaglia & Sederoff 1994), and expressed sequence tag  
982 polymorphisms (Temesgen et al. 2001) were among the first used to test evolutionary  
983 hypotheses in trees related to genome organization and the mapping of complex traits  
984 (discussed in Eckert et al. 2009). Marker technology has progressed considerably since this  
985 time (dozens of markers) to include markers capable of more densely sampling tree genomes  
986 (up to millions of markers). For example, array-based designs (Silva-Junior et al. 2015) and  
987 exome capture (Suren et al. 2016) allow for hundreds to tens of thousands of markers (which  
988 can be dwarfed by the number of subsequently called SNPs) whereas RADseq (reviewed in  
989 Parchman et al. in review) is in the range of tens- to hundreds of thousands of markers (e.g.,  
990 Parchman et al. 2012) and whole genome sequencing in the range of millions (e.g., Stölting et  
991 al. 2015). However, while the continual advent of sequencing technology will likely allow for  
992 more SNPs and longer sequences, it is ultimately the concordance between polygenic  
993 expectations and analytical methods of marker data that will determine the success of such  
994 endeavors. With this in mind, future studies aimed at answering outstanding questions (Table 1)  
995 will benefit from a diverse set of markers that represent both functional proteins (genic regions)  
996 as well as those which control aspects of their expression or post-transcriptional regulation. If  
997 one lesson is to be gained from the recent discussion of the applicability of reduced  
998 representation techniques (Lowry et al. 2016, 2017; Catchen et al. 2017; McKinney et al. 2017),  
999 it is that genomic resources are paramount to advancement of knowledge, especially when

Lind *et al.*: Are we out of the woods yet?

1000 developed with knowledge of patterns of linkage disequilibrium or, if not with this knowledge,  
1001 with goal of quantifying it. However, RADseq remains one of the most cost-effective approaches  
1002 available to trees and should thus be assessed in the specific context of tree species,  
1003 particularly when strengths and limitations are understood and addressed (as reviewed in  
1004 Parchman et al. in review). No matter the approach used for association, some aspect of the  
1005 architecture is likely to be missed in trees. For example, RADseq-based markers developed  
1006 within large genomes are not enriched within genic regions where structural changes to proteins  
1007 are expected to affect phenotypes, although choice of enzymes can affect the relative  
1008 proportion of genic regions in tree genomes, as evidenced from *in silico* digestions of reference  
1009 genomes from *Populus*, *Eucalyptus*, *Amborella*, *Pseudotsuga*, and *Pinus* species (Parchman et  
1010 al. in review). In contrast, exome based approaches are anchored within coding regions thus  
1011 excluding putative regulatory elements outside of the exomic regions used to develop probes.  
1012 Recent marker development approaches, such as RAPTURE (Ali et al. 2016), however, have  
1013 blurred the lines between RADseq and exome based approaches and may offer a promising,  
1014 cost-effective path forward that explicitly avoids biased assumptions about the importance of  
1015 exomic versus intergenic loci comprising the architecture of local adaptation.

1016       Beyond dense genetic linkage maps (e.g., Friedline et al. 2015) and reference genomes,  
1017 which undoubtedly should be among our top priorities, other techniques outside of traditional  
1018 genomics, such as transcriptomics, have the potential to complement genomic studies in many  
1019 ways without great need for existing species-specific resources (reviewed in Romero et al.  
1020 2012, Strickler et al. 2012; Vialette-Guiraud et al. 2016). For instance, comparative  
1021 transcriptomic techniques in trees can be used to identify putatively orthologous sets of markers  
1022 (e.g., Wachowiak et al. 2015; Yeaman et al. 2016) that can be used to describe the evolution of  
1023 architecture (e.g., shared orthologs versus paralogs across species) or for comparative linkage  
1024 mapping (Ritland et al. 2011) across systems. Additionally, with the appropriate study design,  
1025 transcriptomics can be implemented in tree species to describe various aspects of differential



Lind *et al.*: Are we out of the woods yet?

1026 expression (Cohen et al. 2010; Carrasco et al. 2017; Cronn et al. 2017), selective constraint  
1027 (Mähler et al. 2017), prevailing selective forces (Hodgins et al. 2016), mapping of disease  
1028 resistance (Liu et al. 2016; Liu et al. 2017), and regulatory networks (Zinkgraf et al. 2017). The  
1029 multilocus paradigm of transcriptomics is amenable to identifying and testing hypotheses of the  
1030 genetic architecture of complex traits in a network framework (Jansen et al. 2009; Leiserson et  
1031 al. 2013; Civelek & Lusk 2014) and will no doubt provide valuable contributions for tree evolu-  
1032 tionary biologists. Other areas amenable to network description such as metabolomics and prot-  
1033 eomics would also be a complement (see Cowen et al. 2017), particularly if genetic studies con-  
1034 textualize results with findings from such approaches and vice versa. Ultimately the goal is to  
1035 use *a priori* knowledge synthesized across past studies, techniques, and perspectives to guide  
1036 further hypotheses about underlying architecture, as exemplified by Mizrachi et al. (2017) and  
1037 Lotterhos et al. (2017). Finally, high-throughput phenotyping as well as environmental measures  
1038 at fine spatial scales below square-kilometers will also facilitate and advance our understanding  
1039 of complex traits in trees (Sork et al. 2013; Rellstab et al. 2015; Leempoel et al. 2017).

#### 1040 ***Standardized data reporting***

1041 As we continue to accrue genotype-phenotype, genotype-environment, and phenotype-  
1042 environment relationships within and across tree species, authors should consider how their  
1043 results can most effectively be used in further studies and syntheses, both for the purpose of  
1044 validation or comparison as well as novel insights yet to be seen. Here we outline a few  
1045 suggestions that can be broken down into reporting within manuscripts and metadata. For  
1046 instance, in our survey of common garden studies used to estimate  $h^2$  and  $Q_{ST}$ , in many cases  
1047 the exact design of the study could not be replicated with the information from the manuscript  
1048 alone. While an abbreviated design may be suitable for the main text, authors can provide much  
1049 more detail in supplemental materials that can facilitate replication and comparison across  
1050 studies (e.g., total individuals per garden, family, or block – as opposed to averages or ranges),

Lind *et al.*: Are we out of the woods yet?

1051 which will ultimately facilitate syntheses regarding future directions. Further, future studies  
1052 would benefit from estimating relatedness using marker data which will ultimately improve the  
1053 precision of  $h^2$ ,  $Q_{ST}$ , and missing heritability estimates (de Villemereuil et al. 2016) including  
1054 those estimates made in the field (Castellanos et al. 2015). For cases in which estimating  
1055 relatedness from markers is not appropriate or feasible, the field would benefit by authors  
1056 exploring a range of underlying sibships (e.g., Eckert et al. 2015), which are often assumed to  
1057 be half-sib relationships. While some studies in our survey assumed a mixed sibship  
1058 relationship for open-pollinated sources, ultimately such assumptions without data exploration  
1059 will affect the outcome or conclusions for any given study. A recently released R package by  
1060 Gilbert and Whitlock (2014) allows for such an exploration of effects of mixed sibships on  
1061 inference of  $Q_{ST}$  and its magnitude relative to  $F_{ST}$ . Inclusion of such exploration, even in the  
1062 supplement, will help contextualize such studies as they are published. For studies estimating  
1063 causality for genotype to phenotype, it would be worthwhile to include the regression  
1064 coefficients or other estimates of effect size (e.g., odds ratios) in addition to PVE ( $r^2$ ).  
1065 Importantly, the units of the effect size must be explicitly reported (e.g., Julian days versus  
1066 phenotypic standard deviations), with the standard deviation also reported. For all association  
1067 studies, supplemental tab- or comma-delimited text files (outside of a word processing  
1068 document) easily analyzed with programming languages would also facilitate synthesis (even if  
1069 providing redundant information from the main text), particularly if such files are well described  
1070 with a README file and contained data regarding marker position, putative orthogroups, hits to  
1071 reference genomes, effect size, PVE, genotypes by individual identifiers, individual population  
1072 assignments, and if the sequence or marker was significantly associated to phenotype or  
1073 environment. Such an operating procedure may work well in the short term, however in the long  
1074 term such information will need to be easily accessible from one or a central hub of repositories.

1075 Data standardization, the inclusion of meta-information, and compilation of these data  
1076 specific to trees into a database with common terminology will be crucial to future inquiries with

Lind *et al.*: Are we out of the woods yet?

1077 the purpose of synthesizing evidence for underlying architectures across species and  
1078 environmental systems (e.g., as for human GWAS data: <https://www.ebi.ac.uk/gwas/>). If the  
1079 data generated by tree biologists is disparate and housed across databases and journal  
1080 supplements this impedes synthesis first by forcing scientists to collate information across  
1081 sources, which may be further impeded by data redundancies or inconsistencies in data format  
1082 and utilized nomenclature (Wegrzyn et al. 2012). While many journals have required submission  
1083 of sequence data to repositories such as NCBI, such databases are lacking with regard to  
1084 information pertaining to phenotypic, environmental, and geographic information upon which  
1085 much of the foundation of our field is built. Submissions to Dryad somewhat overcome this, but  
1086 there is no standardization within the community for content for such submissions and important  
1087 information may be lacking. Currently, this information is often appended in supplemental files  
1088 that cannot be readily accessed, compared, or queried in an efficient manner. Hierarchical  
1089 ontologies can be used to ease this burden. Gene Ontology is likely the most recognizable to  
1090 evolutionary biologists, but there also exist Plant Ontologies for organismal structure and  
1091 developmental stages, Environmental Ontologies for habitat categorization, and Phenotypic,  
1092 Attribute, and Trait Ontologies for the annotation of phenotypes. Such ontologies not only  
1093 standardize nomenclature, but also assist in database queries. The utilization of such databases  
1094 will no doubt encourage comparative studies and syntheses, as infrastructure and data  
1095 accessibility are essential to the comparative approach (Neale et al. 2013; Ingvarsson et al.  
1096 2016; Plomion et al. 2016). Luckily, such a database exists for the broader tree genetics  
1097 community. The open-source genomics and phenomics database, called TreeGenes  
1098 ([treegenesdb.org](http://treegenesdb.org)), is part of a central hub of repositories, including the Hardwood Genomics  
1099 Project ([hardwoodgenomics.org](http://hardwoodgenomics.org)) and the Genome Database for Roseaceae ([rosaceae.org](http://rosaceae.org)), that  
1100 communicate and integrate data from each other. Unlike many other repositories for tree  
1101 genomic data, TreeGenes is not project or institution specific. The data and metadata for  
1102 roughly 1700 species housed on TreeGenes can be accessed, queried, and visualized through

Lind *et al.*: Are we out of the woods yet?

1103 DiversiTree, a web-based, desktop-style interface (Wegrzyn et al. 2008). DiversiTree connects  
1104 to the geographical interface CartograTree (Vasquez-Gross et al. 2013) to encourage  
1105 comparative synthesis by providing technology to filter and visualize geo-referenced biotic and  
1106 abiotic data housed on TreeGenes. As promising as such database hubs are, they are only as  
1107 useful as the data that is deposited to them. While TreeGenes will regularly import and enhance  
1108 data from public repositories (through e.g., sequence alignment to published genomes, or data  
1109 from Genbank, Phytozome, PLAZA, etc), often pertinent metadata necessary for comparative  
1110 synthesis is lacking (Wegrzn et al. 2008, 2012). Indeed, from our survey of published GPA since  
1111 the release of the database in 2008, less than 13% (6/48) of the studies submitted their data  
1112 directly to TreeGenes. To better prepare for future synthesis, we advocate that authors submit  
1113 their data to the TreeGenes database and that reviewers and editors enforce this habit, as  
1114 currently implemented for linkage maps published in *Tree Genetics & Genomes*. Consolidated,  
1115 open-source resources will be crucial to the advancement of this field (Neale et al. 2013), and  
1116 will no doubt spur knowledge that would not have been recognized otherwise. Prime examples  
1117 of advancement to knowledge because of these types of resources and community-wide efforts  
1118 come from the human GWAS literature where such resources provide crucial information  
1119 necessary to study polygenic adaptation (e.g., Berg & Coop 2014).

## 1120 *Empirical tests of theory*

1121 In combination with the development of truly genome-wide public resources, there is  
1122 need to use these resources to validate and better characterize foundational ideas and  
1123 assumptions in the theory of polygenic adaptation relative to the life history strategies of tree  
1124 species. For example, Gagnaire & Gaggiotti (2016) highlight that the degree of polygenicity can  
1125 be tested as a function of the number of GWAS hits relative to the length of contigs or  
1126 chromosomes containing these markers. Simple models of polygenicity predict that there should  
1127 be a positive correlation between these quantities. Thus, rather than assuming some functional

Lind *et al.*: Are we out of the woods yet?

1128 form of a polygenic architecture (i.e., an approximate infinitesimal model) during analysis,  
1129 researchers can strive to characterize, or at least exclude some forms of, the underlying genetic  
1130 architecture prior to interpretation. In a related fashion, publically available data sets would spur  
1131 comparisons across species and study systems to test hypotheses about polygenic  
1132 architectures (e.g., the modularity of genetic architectures as in Lotterhos *et al.* 2017, or  
1133 perhaps genomic organization or effect size distribution) due to the relative timing of selection,  
1134 degree of environmental contrast (e.g., diversifying selection and changes to the strength of  
1135 negative selection), selection strength, and level of gene flow across diverging lineages. As an  
1136 example, much of the theory of polygenic adaptation requires assumptions about simplistic  
1137 demographics (where violations have consequences for standing levels of non-neutral diversity,  
1138 e.g., Wang *et al.* 2017) and the equilibration among co-acting evolutionary forces over a large  
1139 number of generations (Brandvain & Wright 2016). Indeed, differing architectures are expected  
1140 as a function of the timing for the onset of selection (Le Corre & Kremer 2003; Kremer & Le  
1141 Corre 2012), with subtle allele frequency shifts across populations dominating architectures  
1142 near the onset of selection and larger allele frequency shifts much later in time. While there is  
1143 need for empirical validation of this theory, there is also a need to characterize the prevalence of  
1144 its predicted patterns across differing clades of tree species. In other words, researchers could  
1145 imagine testing the theory itself in natural populations (e.g., as begun by Le Corre & Kremer  
1146 2012) or assuming its validity and characterizing the circumstances under which to expect large  
1147 shifts in allele frequencies across tree species with differing life history strategies. Little of any of  
1148 this (Table 1), however, will be possible without development of needed data and its deposition  
1149 into publically available, standardized databases.

## 1150 **Concluding Remarks**

1151         The path forward provides a means by which we can most efficiently describe the  
1152 underlying genetic architectures of traits important to management, conservation, and industry,

Lind *et al*: Are we out of the woods yet?

1153 which can ultimately be used to expedite breeding projects (Box 1). The past evolutionary  
1154 history will have a profound effect on the underlying genetic architecture of such traits, and thus  
1155 strengths and weakness of the data and methods used to uncover such architecture should be  
1156 specifically addressed in the future, particularly in how utilized methods perform across various  
1157 demographic and architecture scenarios. Insights gained from empirically testing theory will also  
1158 contribute to the advancement of this field and will ultimately quantify the variation in archi-  
1159 tecture across environments and species and inform effective management. Importantly, the  
1160 success of future genotype-phenotype efforts should not be predicated on past studies using  
1161 single-locus approaches and small numbers of markers, and instead on overcoming such  
1162 shortcomings by applying theoretical expectations to empirical inquiry. Even so, until  
1163 sequencing technologies allow for cost-effective whole genome sequencing of individual trees,  
1164 most genotype-phenotype studies (GS included) will be carried out via reduced representation  
1165 techniques (i.e., a subset of all sites within the genome). Therefore, it is essential that  
1166 processed data be uploaded to a repository that, in addition to raw sequences, includes  
1167 genotypic, environmental, and spatial data, facilitates user-friendly queries, and allows for future  
1168 meta-analysis. The future is bright, but we are not yet out of the woods. As such, efficient  
1169 advancement in this field relies on community efforts, standardized reporting, centralized open-  
1170 access databases, and continual input and review within the community's research.

## 1171 **Acknowledgements**

1172 The authors would like to thank S. González-Martínez for inviting this review, Chris Friedline for  
1173 stimulating conversations when developing content, and Justin Bagley and Jill Wegrzyn for  
1174 providing helpful comments to earlier versions of this manuscript. Brandon Lind is supported  
1175 through a Dissertation Fellowship provided by the Graduate School of Virginia Commonwealth  
1176 University. Andrew Eckert is supported through the National Science Foundation (EF-1442486)  
1177 and the United States Department of Agriculture (USDA 2016-67013-24469).

## 1178 **References**

- 1179 Adams WT, Joly RJ (1980) Linkage relationships among twelve allozyme loci in loblolly pine. J  
1180 Heredity 71:199–202
- 1181 Alberto FJ, Aitken SN, Alía R (2013) Potential for evolutionary responses to climate change–  
1182 evidence from tree populations. *Global Change Biology* 19:1645–1661. doi:  
1183 10.1111/gcb.12181
- 1184 Ali, O. A., O’Rourke, S. M., Amish, S. J., Meek, M. H., Luikart, G., Jeffres, C., & Miller, M. R.  
1185 (2016). RAD capture (Rapture): flexible and efficient sequence-based genotyping. *Genetics*,  
1186 202(2), 389-400.
- 1187 Álvarez-Castro JM, Carlborg O. A unified model for functional and statistical epistasis and its  
1188 application in quantitative trait loci analysis. *Genetics*. 2007; 176: 1151–1167. doi:  
1189 10.1534/genetics.106. 067348
- 1190 Anderson JT, LEE C-R, Rushworth CA, et al (2012) Genetic trade-offs and conditional  
1191 neutrality contribute to local adaptation. *Molecular Ecology* 22:699–708. doi:  
1192 10.1111/j.1365-294X.2012.05522.x
- 1193 Arnold SJ (1992) Constraints on phenotypic evolution. *The American Naturalist* 140:S85–S107.  
1194 doi: 10.1086/285398
- 1195 Ashander J, Chevin L-M, Baskett ML (2016) Predicting evolutionary rescue via evolving  
1196 plasticity in stochastic environments. *Proceedings of the Royal Society B: Biological*  
1197 *Sciences* 283:20161690–10. doi: 10.1098/rspb.2016.1690
- 1198 Ávila V, Pérez-Figueroa A, Caballero A, et al (2014) The action of stabilizing selection,  
1199 mutation, and drift on epistatic quantitative traits. *Evolution* 68:1974–1987. doi:  
1200 10.1111/evo.12413
- 1201 Bailey SF, Bataillon T (2016) Can the experimental evolution programme help us elucidate the  
1202 genetic basis of adaptation in nature? *Molecular Ecology* 25:203–218. doi:  
1203 10.1111/mec.13378
- 1204 Barrett R, Schluter D (2008) Adaptation from standing genetic variation. *Trends in Ecology &*  
1205 *Evolution* 23:38–44. doi: 10.1016/j.tree.2007.09.008
- 1206 Bartholomé et al. (2016) Performance of genomic selection within and across generations in  
1207 maritime pine. *BMC Genomics* 17:604.
- 1208 Barton NH (2017) How does epistasis influence the response to selection? *Heredity* 118:96–109.

- 1209       doi: 10.1038/hdy.2016.109
- 1210       Barton NH (1990) Pleiotropic models of quantitative variation. *Genetics* 124:773–782.
- 1211       Barton NH (1999) Clines in polygenic traits. *Genetical Research* 74:223–236. doi:  
1212       10.1017/S001667239900422X
- 1213       Barton NH, Etheridge AM, Véber A (2016) The infinitesimal model. *bioRxiv* 1–54. doi:  
1214       10.1101/039768
- 1215       Beavis W. 1994. The power and deceit of QTL experiments: lessons from comparative QTL  
1216       studies. Proceedings of the forty-ninth annual corn and sorghum industry research  
1217       conference. Chicago, IL, USA: American Seed Trade Association, 250–266.
- 1218       Béréños *et al.* (2014) Estimating quantitative genetic parameters in wild populations: a  
1219       comparison of pedigree and genomic approaches. *Molecular Ecology* 23: 3434-3451.
- 1220       Berg JJ, Coop G (2014) A Population Genetic Signal of Polygenic Adaptation. *PLoS Genetics*  
1221       10:e1004412.
- 1222       Bernardo R, Yu JM. 2007. Prospects for genomewide selection for quantitative traits in maize.  
1223       *Crop Science* 47: 1082–1090.
- 1224       Berry AJ, Ajioka JW, Kreitman M (1991) Lack of polymorphism on the *Drosophila* fourth  
1225       chromosome resulting from selection. *Genetics* 129:1111–1117.
- 1226       Bessega C, Pometti C, Ewens M *et al.* (2015) Evidences of local adaptation in quantitative traits  
1227       in *Prosopis alba* (Leguminosae). *Genetica* 143: 31. doi:10.1007/s10709-014-9810-5
- 1228       Blanquart F, Kaltz O, Nuismer SL, Gandon S (2013) A practical guide to measuring local  
1229       adaptation. *Ecology Letters* 16:1195–1205. doi: 10.1111/ele.12150
- 1230       Bontemps *et al.* (2016) In situ marker-based assessment of leaf trait evolutionary potential in a  
1231       marginal European beech population. *Journal of Evolutionary Biology* 29: 514-527.
- 1232       Boshier D, Broadhurst L, Cornelius J, *et al* (2015) Is local best? Examining the evidence for  
1233       local adaptation in trees and its scale. *Environmental Evidence* 4:1–10. doi:  
1234       10.1186/s13750-015-0046-3
- 1235       Bower AD, Aitken SN (2008) Ecological genetics and seed transfer guidelines for *Pinus*  
1236       albicaulis (Pinaceae). *American Journal of Botany* 95:66–76.
- 1237       Boyle EA, Li YI, Pritchard JK (2017) An Expanded View of Complex Traits: From Polygenic to  
1238       Omnigenic. *Cell* 169:1177–1186. doi: 10.1016/j.cell.2017.05.038



- 1239 Brandvain Y, Wright SI (2016) The Limits of Natural Selection in a Non-equilibrium World.  
1240 Trends in Genetics 32:201–210. doi: 10.1016/j.tig.2016.01.004
- 1241 Breiman, L. (2001). Random Forests. Machine Learning, 45(1), 5–32.  
1242 <http://doi.org/10.1023/A:1010933404324>
- 1243 Budde KB, Heuertz M, Hernandez-Serrano A et al. (2014) In situ genetic association for  
1244 serotiny, a fire-related trait, in Mediterranean maritime pine (*Pinus pinaster*). New  
1245 Phytologist 201:230–241.
- 1246 Bulmer MG (1980) The mathematical theory of quantitative genetics. Genetical research 19: 17-  
1247 25.
- 1248 Bürger R (1999) Evolution of Genetic Variability and the Advantage of Sex and Recombination  
1249 in Changing Environments. Genetics 153:1055–1069.
- 1250 Bürger R, Akerman A (2011) The effects of linkage and gene flow on local adaptation: A two-  
1251 locus continent-island model. Theoretical Population Biology 80:272–288. doi:  
1252 10.1016/j.tpb.2011.07.002
- 1253 Bürger R, Lynch M (1995) Evolution and extinction in a changing environment: a quantitative-  
1254 genetic analysis. Evolution 49:151–163. doi: 10.2307/2410301
- 1255 Burghardt LT, Young ND, Tiffin P (2017) A Guide to Genome-Wide Association Mapping in  
1256 Plants. Current Protocols in Plant Biology. doi: 10.1002/cppb.20041
- 1257 Caballero A, Tenesa A, Keightley PD (2015) The nature of genetic variation for complex traits  
1258 revealed by GWAS and regional heritability mapping analyses. Genetics 201:1601-1613.
- 1259 Čalić I, Bussotti F, Martínez-García PJ, Neale DB (2015) Recent landscape genomics studies in  
1260 forest trees. Tree Genetics & Genomes 1–7. doi: 10.1007/s11295-015-0960-0
- 1261 Carlborg Ö, Haley CS (2004) Epistasis: too often neglected in complex trait studies? Nature  
1262 Reviews Genetics 5:618–625. doi: 10.1038/nrg1407
- 1263 Carrasco A, Wegrzyn JL, Durán R, et al (2017) Expression profiling in *Pinus radiata* infected  
1264 with *Fusarium circinatum*. Tree Genetics & Genomes 13:1665. doi: 10.1007/s11295-017-  
1265 1125-0
- 1266 Carter AJR, Hermisson J, Hansen TF (2005) The role of epistatic gene interactions in the  
1267 response to selection and the evolution of evolvability. Theoretical Population Biology  
1268 68:179–196. doi: 10.1016/j.tpb.2005.05.002
- 1269 Catchen JM, Hohenlohe PA, Bernatchez L, et al (2017) Unbroken: RADseq remains a powerful

- 1270 tool for understanding the genetics of adaptation in natural populations. *Molecular Ecology*  
1271 *Resources* 17:362–365. doi: 10.1111/1755-0998.12669
- 1272 Charlesworth, B. 2013. Background selection 20 years on: The Wilhelmine E. Key 2012  
1273 Invitational Lecture. *Journal of Heredity* 104: 161-171.
- 1274 Charlesworth B, Charlesworth D (2010) *Elements of Evolutionary Genetics*. Greenwood Village,  
1275 CO: Roberts and Company Publishers. 734 pp.
- 1276 Chaves, J. A., Cooper, E. A., Hendry, A. P., Podos, J., De León, L. F., Raeymaekers, J. A. M., et  
1277 al. (2016). Genomic variation at the tips of the adaptive radiation of Darwin’s finches.  
1278 *Molecular Ecology*, 25(21), 5282–5295. <http://doi.org/10.1111/mec.13743>
- 1279 Cheverud JM, Routman EJ (1995) Epistasis and its contribution to genetic variance components.  
1280 *Genetics* 139:1455–1461.
- 1281 Chevin L-M (2012) Genetic constraints on adaptation to a changing environment. *Evolution*  
1282 67:708–721. doi: 10.1111/j.1558-5646.2012.01809.x
- 1283 Chevin L-M, Hoffmann AA (2017) Evolution of phenotypic plasticity in extreme environments.  
1284 *Philosophical Transactions of the Royal Society B: Biological Sciences* 372:20160138–12.  
1285 doi: 10.1098/rstb.2016.0138
- 1286 Chevin L-M, Lande R, Mace GM (2010a) Adaptation, Plasticity, and Extinction in a Changing  
1287 Environment: Towards a Predictive Theory. *PLoS Biol* 8:e1000357–8. doi:  
1288 10.1371/journal.pbio.1000357
- 1289 Chevin L-M, Martin G, Lenormand T (2010b) Fisher's model and the genomics of adaptation:  
1290 Restricted pleiotropy, heterogenous mutation, and parallel evolution. *Evolution* 64:3213–  
1291 3231. doi: 10.1111/j.1558-5646.2010.01058.x
- 1292 Chevin L-M, Hospital F (2008) Selective sweep at a quantitative trait locus in the presence of  
1293 background genetic variation. *Genetics* 180:1645–1660. doi: 10.1534/genetics.108.093351
- 1294 Chevin L-M, Lande R (2011) Adaptation to marginal habitats by evolution of increased  
1295 phenotypic plasticity. *Journal of Evolutionary Biology* 24:1462–1476. doi: 10.1111/j.1420-  
1296 9101.2011.02279.x
- 1297 Cheplick GP (2015) *Approaches to Plant Evolutionary Ecology*. Oxford University Press, USA.
- 1298 Civelek M, Lusk AJ (2013) Systems genetics approaches to understand complex traits. *Nature*  
1299 *Publishing Group* 15:34–48. doi: 10.1038/nrg3575
- 1300 Cockerham CC (1954) An Extension of the Concept of Partitioning Hereditary Variance for

- 1301 Analysis of Covariances among Relatives When Epistasis Is Present. *Genetics* 39:859–882.
- 1302 Cohen D, Bogeat-Triboulot M-B, Tisserant E, et al (2010) Comparative transcriptomics of  
1303 drought responses in *Populus*: a meta-analysis of genome-wide expression profiling in  
1304 mature leaves and root apices across two genotypes. *BMC Genomics* 11:630. doi:  
1305 10.1186/1471-2164-11-630
- 1306 Collins S, de Meaux J, Acquisti C (2007) Adaptive walks toward a moving optimum. *Genetics*  
1307 176:1089–1099. doi: 10.1534/genetics.107.072926
- 1308 Comeault AA, Flaxman SM, Riesch R, et al (2015) Selection on a genetic polymorphism  
1309 counteracts ecological speciation in a stick insect. *Current Biology* 25:1975–1981. doi:  
1310 10.1016/j.cub.2015.05.058
- 1311 Comeault AA, Soria-Carrasco V, Gompert Z, et al (2014) Genome-wide association mapping of  
1312 phenotypic traits subject to a range of intensities of natural selection in *Timema cristinae*.  
1313 *The American Naturalist* 183:711–727. doi: 10.1086/675497
- 1314 Cornelius J (1994) Heritabilities and additive genetic coefficients of variation in forest trees. *Can*  
1315 *J For Res* 24:372–379. doi: 10.1139/x94-050
- 1316 Costanza R, d'Arge R, De Groot R, et al (1997) The value of the world's ecosystem services  
1317 and natural capital. *Nature* 387:253-260. doi: <http://dx.doi.org/10.1038/387253a0>
- 1318 Cowen L, Ideker T, Raphael BJ, Sharan R (2017) Network propagation: a universal amplifier of  
1319 genetic associations. *Nat Ecol Evol* 18:551–562. doi: 10.1038/nrg.2017.38
- 1320 Cronn R, Dolan PC, Jogdeo S, et al (2017) Transcription Through The Eye Of A Needle: Daily  
1321 And Annual Cycles Of Gene Expression Variation In Douglas-Fir Needles. bioRxiv. doi:  
1322 10.1101/117374
- 1323 Crow JF (2010) On epistasis: why it is unimportant in polygenic directional selection.  
1324 *Philosophical Transactions of the Royal Society B: Biological Sciences* 365:1241–1244.  
1325 doi: 10.1098/rstb.2009.0275
- 1326 Crow JF (2008) Maintaining evolvability. *Journal of genetics* 87:349–353. doi: 10.1007/s12041-  
1327 008-0057-8
- 1328 Cruickshank TE, Hahn MW (2014) Reanalysis suggests that genomic islands of speciation are  
1329 due to reduced diversity, not reduced gene flow. *Molecular Ecology* 23:3133–3157. doi:  
1330 10.1111/mec.12796
- 1331 Csilléry K, Lalagüe H, Vendramin GG, González-Martínez SC, Fady B, Oddou-Muratorio S  
1332 (2014) Detecting short spatial scale local adaptation and epistatic selection in climate-

- 1333 related candidate genes in European beech (*Fagus sylvatica*) populations. *Molecular*  
1334 *Ecology* 23:4696–4708.
- 1335 La Torre De AR, Li Z, Van de Peer Y, Ingvarsson PK (2017) Contrasting Rates of Molecular  
1336 Evolution and Patterns of Selection among Gymnosperms and Flowering Plants. *Molecular*  
1337 *Biology and Evolution* 34:1363–1377. doi: 10.1093/molbev/msx069
- 1338 De Mita S, Thuillet A-C, Gay L, et al (2013) Detecting selection along environmental gradients:  
1339 analysis of eight methods and their effectiveness for outbreeding and selfing populations.  
1340 *Molecular Ecology* 22:1383–1399. doi: 10.1111/mec.12182
- 1341 Devey ME, Fiddler TA, Liu BH, Knapp SJ, Neale DB (1994) An RFLP linkage map for loblolly  
1342 pine based on a three-generation outbred pedigree. *Theor Appl Genet* 88:273–278
- 1343 de Villemereuil P, Gaggiotti OE, Mouterde M, Till-Bottraud I (2015) Common garden  
1344 experiments in the genomic era: new perspectives and opportunities. *Heredity* 116:249–254.  
1345 doi: 10.1038/hdy.2015.93
- 1346 de Visser JAGM, Cooper TF, Elena SF (2011) The causes of epistasis. *Proc Biol Sci* 278:3617–  
1347 3624. doi: 10.1098/rspb.2011.1537
- 1348 de Vladar HP, Barton N (2014) Stability and response of polygenic traits to stabilizing selection  
1349 and mutation. *Genetics*. doi: 10.1534/genetics.113.159111/-/DC1
- 1350 Devlin B, Roeder K (1999) Genomic control for association studies. *Biometrics* 55:997-1004.
- 1351 Dickson, S. P., Wang, K., Krantz, I., Hakonarson, H., & Goldstein, D. B. (2010). Rare variants  
1352 create synthetic genome-wide associations. *PLoS biology*, 8(1), e1000294.
- 1353 Dittmar EL, Oakley CG, Conner JK, et al (2016) Factors influencing the effect size distribution  
1354 of adaptive substitutions. *Proc Biol Sci* 283:20153065–8. doi: 10.1098/rspb.2015.3065
- 1355 Donohue K, Rubio de Casas R, Burghardt L, Kovach K, Willis CG (2010) Germination, post-  
1356 germination adaptation, and species ecological ranges. *Annual Review of Ecology*  
1357 *Evolution and Systematics* 41:293–319.
- 1358 Du, J., & Groover, A. (2010, January). Transcriptional regulation of secondary growth and wood  
1359 formation. *Journal of Integrative Plant Biology*.
- 1360 East EM (1910) A Mendelian interpretation of variation that is apparently continuous. *The*  
1361 *American Naturalist* 44:65–82.
- 1362 Eckert AJ, Bower AD, Jermstad KD, et al (2013a) Multilocus analyses reveal little evidence for  
1363 lineage-wide adaptive evolution within major clades of soft pines (*Pinus* subgenus *Strobus*).  
1364 *Molecular Ecology* 22:5635–5650. doi: 10.1111/mec.12514

- 1365 Eckert AJ, Maloney PE, Vogler DR, et al (2015) Local adaptation at fine spatial scales: an  
1366 example from sugar pine (*Pinus lambertiana*, *Pinaceae*). *Tree Genetics & Genomes* 11:1-  
1367 17.
- 1368 Eckert AJ, Pande B, Ersoz ES, Wright MH, Rashbrook VK, Nicolet CM, Neale DB (2009) High-  
1369 throughput genotyping and mapping of single nucleotide polymorphisms in loblolly pine  
1370 (*Pinus taeda* L.). *Tree Genetics & Genomes* 5:225-234. doi: 10.1007/s11295-008-0183-8
- 1371 Eckert AJ, Wegrzyn JL, Cumbie WP, et al (2012) Association genetics of the loblolly pine  
1372 (*Pinus taeda*, *Pinaceae*) metabolome. *New Phytologist* 193:890–902. doi: 10.1111/j.1469-  
1373 8137.2011.03976.x
- 1374 Eckert AJ, Wegrzyn JL, Liechty JD, et al (2013b) The Evolutionary Genetics of the Genes  
1375 Underlying Phenotypic Associations for Loblolly Pine (*Pinus taeda*, *Pinaceae*). *Genetics*  
1376 195:1353–1372. doi: 10.1534/genetics.113.157198/-/DC1
- 1377 Ehret GB, Lamparter D, Hoggart CJ, Whittaker JC, Beckmann JS, Kutalik Z, Genetic  
1378 Investigation of Anthropometric Traits Consortium (2012) A multi-SNP locus-association  
1379 method reveals a substantial fraction of the missing heritability. *The American Journal of*  
1380 *Human Genetics*, 91, 863–871.
- 1381 Eyre-Walker A, Keightley PD (2007) The distribution of fitness effects of new mutations. *Nature*  
1382 *Reviews Genetics* 8:610–618. doi: 10.1038/nrg2146
- 1383 Evans, L. M., Kaluthota, S., Pearce, D. W., Allan, G. J., Floate, K., Rood, S. B., & Whitham, T.  
1384 G. (2016). Bud phenology and growth are subject to divergent selection across a latitudinal  
1385 gradient in *Populus angustifolia* and impact adaptation across the distributional range and  
1386 associated arthropods. *Ecology and evolution* 6:4565-4581. doi: 10.1002/ece3.2222
- 1387 Falconer DS (1989) *Introduction to quantitative genetics*, 3d ed. Longman, New York.
- 1388 Feder JL, Egan SP, Nosil P (2012a) The genomics of speciation-with- gene-flow. *Trends in*  
1389 *Genetics* 28:342–350. doi: 10.1016/j.tig.2012.03.009
- 1390 Feder JL, Gejji R, Yeaman S, Nosil P (2012b) Establishment of new mutations under divergence  
1391 and genome hitchhiking. *Philosophical Transactions of the Royal Society B: Biological*  
1392 *Sciences* 367:461–474. doi: 10.1038/nature08480
- 1393 Feder JL, Nosil P (2010) The efficacy of divergence hitchhiking in generating genomic islands  
1394 during ecological speciation. *Evolution* 64:1729–1747. doi: 10.1111/j.1558-  
1395 5646.2009.00943.x
- 1396 Feldman M, Lewontin R (1975) The heritability hang-up. *Science* 190:1163–1168. doi:

- 1397 10.1126/science.1198102
- 1398 Felsenstein J (1976) The theoretical population genetics of variable selection and migration.  
1399 *Annu Rev Genet* 10:253–280.
- 1400 Fisher RA (1918) The correlation between relatives on the supposition of Mendelian inheritance.  
1401 *Transactions of the Royal Society of Edinburgh* 52:399–433.
- 1402 Fisher RA (1930) *The genetical theory of natural selection: a complete variorum edition*. Oxford  
1403 University Press
- 1404 Forester BR, Lasky JR, Wagner HH, Urban DL (2017) Using genotype-environment associations  
1405 to identify multilocus local adaptation. *bioRxiv* 1–24. doi: 10.1101/129460
- 1406 Franks SJ, Weber JJ, Aitken SN (2013) Evolutionary and plastic responses to climate change in  
1407 terrestrial plant populations. *Evolutionary Applications* 7:123–139. doi: 10.1111/eva.12112
- 1408 Friedline CJ, Lind BM, Hobson EM, et al (2015) The genetic architecture of local adaptation I:  
1409 the genomic landscape of foxtail pine (*Pinus balfouriana* Grev. & Balf.) as revealed from a  
1410 high-density linkage map. *Tree Genetics & Genomes* 11:49. doi: 10.1007/s11295-015-0866-  
1411 x
- 1412 Gagnaire P-A, Gaggiotti OE (2016) Detecting polygenic selection in marine populations by  
1413 combining population genomics and quantitative genetics approaches. *Curr Zool* 62:603–  
1414 616. doi: 10.1093/cz/zow088
- 1415 Gazal S, Finucane HK, Furlotte NA, Loh P, Palamara PF, Liu X, Schoech A, Bulik-Sullivan B,  
1416 Neale BM, Gusev A, Price A (2017) Linkage disequilibrium–dependent architecture of  
1417 human complex traits shows action of negative selection. *Nat. Gen.* 1–7. doi:  
1418 10.1038/ng.3954
- 1419 Gibson G (2012) Rare and common variants: twenty arguments. *Nature Reviews Genetics*  
1420 13:135–145. doi: 10.1038/nrg3118
- 1421 Gilbert, K. J., & Whitlock, M. C. (2015).  $Q_{ST}$ – $F_{ST}$  comparisons with unbalanced half-sib designs.  
1422 *Molecular ecology resources* 15:262-267.
- 1423 Goddard ME, Wray NR, Verbyla K, Visscher PM (2009) Estimating effects and making  
1424 predictions from genome-wide marker data. *Statistical Science* 24:517-529.
- 1425 Gompert, Z., Egan, S. P., Barrett, R. D. H., Feder, J. L., & Nosil, P. (2016). Multilocus  
1426 approaches for the measurement of selection on correlated genetic loci. *Molecular Ecology*,  
1427 1–18. <http://doi.org/10.1111/mec.13867>

- 1428 Gompert, Z., Jahner, J. P., Scholl, C. F., Wilson, J. S., Lucas, L. K., Soria-Carrasco, V., et al.  
1429 (2015). The evolution of novel host use is unlikely to be constrained by trade-offs or a lack  
1430 of genetic variation. *Molecular Ecology*, 24(11), 2777–2793.  
1431 <http://doi.org/10.1111/mec.13199>
- 1432 Goodnight CJ (1988) Epistasis and the effect of founder events on the additive genetic variance.  
1433 *Evolution* 42:441-454. doi: 10.2307/2409030
- 1434 Göring HHH, Terwilliger JD, Blangero J (2001) Large Upward Bias in Estimation of Locus-  
1435 Specific Effects from Genomewide Scans. *The American Journal of Human Genetics*  
1436 69:1357–1369. doi: 10.1086/324471
- 1437 Grandtner, M. M. (2005). Elsevier's Dictionary of Trees: Volume 1: North America. Elsevier.
- 1438 Grattapaglia D (2017) Status and perspectives of genomic selection in forest tree breeding. In  
1439 ME Sorrells, *Genomic Selection for Crop Improvement* (pp. 199-257). Cham, Switzerland:  
1440 Springer.
- 1441 Grattapaglia D, Resende MDV (2011) Genomic selection in forest tree breeding. *Tree Genetics*  
1442 *& Genomes* 7: 241-255.
- 1443 Grattapaglia D, Sederoff R (1994) Genetic linkage maps of *Eucalyptus grandis* and *Eucalyptus*  
1444 *urophylla* using a pseudo-test cross: mapping strategy and RAPD markers. *Genetics*  
1445 137:1121–1137
- 1446 Griswold CK (2015) Additive genetic variation and evolvability of a multivariate trait can be  
1447 increased by epistatic gene action. *J Theor Biol* 387:241–257. doi:  
1448 10.1016/j.jtbi.2015.09.023
- 1449 Guan, Y., & Stephens, M. (2011). Bayesian variable selection regression for genome-wide  
1450 association studies and other large-scale problems. *Annals of Eugenics*, 5(3), 1780–1815.  
1451 <http://doi.org/10.1214/11-AOAS455>
- 1452 Haldane JBS (1930) A mathematical theory of natural and artificial selection.(Part VI,  
1453 Isolation.). 26:220–230.
- 1454 Hall D, Hallingbäck HR, Wu HX (2016) Estimation of number and size of QTL effects in forest  
1455 tree traits. *Tree Genetics & Genomes* 1–17. doi: 10.1007/s11295-016-1073-0
- 1456 Hansen TF (2006) The Evolution of Genetic Architecture. *Annual Review of Ecology,*  
1457 *Evolution, and Systematics* 37:123–157. doi: 10.1146/annurev.ecolsys.37.091305.110224
- 1458 Hansen TF, Pelabon C, Houle D (2011) Heritability is not evolvability. *Evolutionary Biology*  
1459 38:258-277

- 1460 Hansen TF (2013) Why epistasis is important for selection and adaptation. *Evolution* 67:3501–  
1461 3511. doi: 10.1111/evo.12214
- 1462 Hansen TF (2003) Is modularity necessary for evolvability? *Biosystems* 69:83–94. doi:  
1463 10.1016/S0303-2647(02)00132-6
- 1464 Hansen TF, Wagner GP (2001) Modeling genetic architecture: a multilinear theory of gene  
1465 interaction. *Theoretical Population Biology* 59:61–86. doi: 10.1006/tpbi.2000.1508
- 1466 Heffner EL, Sorrells ME, Jannink JL (2009) Genomic selection for crop improvement. *Crop*  
1467 *Science* 49: 1–12.
- 1468 Hemani G, Knott S, Haley C (2013) An Evolutionary Perspective on Epistasis and the Missing  
1469 Heritability. *PLoS Genetics* 9:e1003295. doi: 10.1371/journal.pgen.1003295
- 1470 Henderson CR (1975) Best linear unbiased estimation and prediction under a selection model.  
1471 *Biometrics* 31:423-447.
- 1472 Hendry AP (2002)  $QST \geq \leq FST$ ? *Trends in Ecology & Evolution* 17:502-502. doi:  
1473 [http://dx.doi.org/10.1016/S0169-5347\(02\)02603-4](http://dx.doi.org/10.1016/S0169-5347(02)02603-4)
- 1474 Hendry AP (2016) Key Questions on the Role of Phenotypic Plasticity in Eco-Evolutionary  
1475 Dynamics. *Journal of Heredity* 107:25–41. doi: 10.1093/jhered/esv060
- 1476 Hereford J (2009) A Quantitative Survey of Local Adaptation and Fitness Trade-Offs. *The*  
1477 *American Naturalist* 173:579–588. doi: 10.1086/597611
- 1478 Hermisson J (2009) Who believes in whole-genome scans for selection? *Heredity* 103:283–284.  
1479 doi: 10.1038/hdy.2009.101
- 1480 Hermisson J, Hansen TF, Wagner GP (2003) Epistasis in Polygenic Traits and the Evolution of  
1481 Genetic Architecture under Stabilizing Selection. *American Naturalist* 161:708–734. doi:  
1482 10.1086/374204
- 1483 Hermisson J, Pennings PS (2005) Soft sweeps: molecular population genetics of adaptation from  
1484 standing genetic variation. *Genetics* 169:2335–2352. doi: 10.1534/genetics.104.036947
- 1485 Hermisson J, Pennings PS (2017) Soft sweeps and beyond: understanding the patterns and  
1486 probabilities of selection footprints under rapid adaptation. *Methods in Ecology and*  
1487 *Evolution* 8:700–716. doi: 10.1111/2041-210X.12808
- 1488 Hill WG (2010) Understanding and using quantitative genetic variation. *Philosophical*  
1489 *Transactions of the Royal Society B* 365:73-85.



- 1490 Hill WG, Goddard ME, Visscher PM (2008) Data and Theory Point to Mainly Additive Genetic  
1491 Variance for Complex Traits. *PLoS Genetics* 4:e1000008–10. doi:  
1492 10.1371/journal.pgen.1000008
- 1493 Hirschhorn JN, Daly MJ (2005) Genome-wide association studies for common diseases and  
1494 complex traits. *Nature Reviews Genetics* 6:95-108.
- 1495 Hoban S, Kelley JL, Lotterhos KE, et al (2016) Finding the Genomic Basis of Local Adaptation:  
1496 Pitfalls, Practical Solutions, and Future Directions. *The American Naturalist* 188:000–000.  
1497 doi: 10.1086/688018
- 1498 Hodgins KA, Yeaman S, Nurkowski KA, et al (2016) Expression Divergence Is Correlated with  
1499 Sequence Evolution but Not Positive Selection in Conifers. *Molecular Biology and*  
1500 *Evolution* 33:1502–1516. doi: 10.1093/molbev/msw032
- 1501 Hoffmann AA, Rieseberg LH (2008) Revisiting the Impact of Inversions in Evolution: From  
1502 Population Genetic Markers to Drivers of Adaptive Shifts and Speciation? *Annual Review*  
1503 *of Ecology, Evolution, and Systematics* 39:21–42. doi:  
1504 10.1146/annurev.ecolsys.39.110707.173532
- 1505 Holliday JA, Aitken SN, Cooke JEK et al. (2017) Advances in ecological genomics in forest  
1506 trees and applications to genetic resources conservation and breeding. *Molecular Ecology*  
1507 26:706–717.
- 1508 Holliday, J. A., Wang, T., & Aitken, S. N. (2012). Predicting adaptive phenotypes from  
1509 multilocus genotypes in Sitka spruce (*Picea sitchensis*) using random forest. *G3: Genes,*  
1510 *Genomes, Genetics*. <http://doi.org/10.1534/g3.112.002733/-/DC1>
- 1511 Holliday JA, Zhou L, Bawa R, et al (2016) Evidence for extensive parallelism but divergent  
1512 genomic architecture of adaptation along altitudinal and latitudinal gradients in *Populus*  
1513 *trichocarpa*. *New Phytologist* 209:1240-1251.
- 1514 Hornoy, B., Pavy, N., Gérardi, S., Beaulieu, J., & Bousquet, J. (2015). Genetic Adaptation to  
1515 Climate in White Spruce Involves Small to Moderate Allele Frequency Shifts in  
1516 Functionally Diverse Genes. *Genome Biology and Evolution*, 7(12), 3269–3285.  
1517 <http://doi.org/10.1093/gbe/evv218>
- 1518 Howe GT, Aitken SN, Neale DB, et al (2003) From genotype to phenotype: unraveling the  
1519 complexities of cold adaptation in forest trees. *Can J Bot* 81:1247–1266. doi: 10.1139/b03-  
1520 141
- 1521 Huang W, Mackay TFC (2016) The Genetic Architecture of Quantitative Traits Cannot Be  
1522 Inferred from Variance Component Analysis. *PLoS Genetics* 12:e1006421–15. doi:  
1523 10.1371/journal.pgen.1006421

- 1524 Huber, C. D., Durvasula, A., Hancock, A. M., & Lohmueller, K. E. (2017). Gene expression  
1525 drives the evolution of dominance. *bioRxiv*, 182865. doi: <http://dx.doi.org/10.1101/182865>
- 1526 Ingvarsson PK, Hvidsten TR, Street NR (2016) Towards integration of population and  
1527 comparative genomics in forest trees. *New Phytologist* 212:338–344. doi:  
1528 10.1111/nph.14153
- 1529 Innan H, Kim Y (2004) Pattern of polymorphism after strong artificial selection in a  
1530 domestication event. *Proceedings of the National Academy of Sciences* 101:10667–10672.  
1531 doi: 10.1073/pnas.0401720101
- 1532 Isik F, Kumar S, Martínez-García PJ, et al (2015) Acceleration of Forest and Fruit Tree  
1533 Domestication by Genomic Selection. *Advances in Botanical Research*. 74: 93-124. doi:  
1534 <http://dx.doi.org/10.1016/bs.abr.2015.05.002>
- 1535 Iwata et al. (2011) prospects for genomic selection in conifer breeding: a simulation study of  
1536 *Cryptomeria japonica*. *Tree Genetics & Genomes* 7: 747-758.
- 1537 Jain K, Stephan W (2015) Response of polygenic traits under stabilizing selection and mutation  
1538 when loci have unequal effects. *G3: Genes | Genomes | Genetics* 5:1065–1074. doi:  
1539 10.1534/g3.115.017970
- 1540 Jain K, Stephan W (2017) Rapid Adaptation of a Polygenic Trait After a Sudden Environmental  
1541 Shift. *Genetics* 206:389–406. doi: 10.1534/genetics.116.196972
- 1542 Jansen RC, Tesson BM, Fu J, et al (2009) Defining gene and QTL networks. *Current Opinion in*  
1543 *Plant Biology* 12:241–246. doi: 10.1016/j.pbi.2009.01.003
- 1544 Jensen JD (2014) On the unfounded enthusiasm for soft selective sweeps. *Nature*  
1545 *Communications* 5:5281. doi: 10.1038/ncomms6281
- 1546 Jensen JD, Kim Y, DuMont VB, et al (2005) Distinguishing between selective sweeps and  
1547 demography using DNA polymorphism data. *Genetics* 170:1401–1410. doi:  
1548 10.1534/genetics.104.038224
- 1549 Johnson RC, Nelson GW, Troyer JL, et al (2010) Accounting for multiple comparisons in a  
1550 genome-wide association study (GWAS). *BMC Genomics* 11:724.
- 1551 Jones AG, Bürger R, Arnold SJ (2014) Epistasis and natural selection shape the mutational  
1552 architecture of complex traits. *Nature Communications* 5:1–10. doi: 10.1038/ncomms4709
- 1553 Joo JWJ, Hormozdiari F, Han B, Eskin E (2016) Multiple testing correction in linear mixed  
1554 models. *Genome Biology* 17:62.

- 1555 Josephs EB, Wright SI, et al (2017a) The Relationship between Selection, Network Connectivity,  
1556 and Regulatory Variation within a Population of *Capsella grandiflora*. *Genome Biology and*  
1557 *Evolution* 9:1099–1109. doi: 10.1093/gbe/evx068
- 1558 Josephs EB, Lee YW, Stinchcombe JR, Wright SI (2015) Association mapping reveals the role  
1559 of purifying selection in the maintenance of genomic variation in gene expression.  
1560 *Proceedings of the National Academy of Sciences* 112:15390–15395. doi:  
1561 10.1073/pnas.1503027112
- 1562 Josephs EB, Stinchcombe JR, Wright SI (2017b) What can genome-wide association studies tell  
1563 us about the evolutionary forces maintaining genetic variation for quantitative traits? *New*  
1564 *Phytologist* 214:21–33. doi: 10.1111/nph.14410
- 1565 Kaplan NL, Hudson RR, Langley CH (1989) The “hitchhiking effect” revisited. *Genetics*  
1566 123:887–899.
- 1567 Kawecki TJ (2008) Adaptation to Marginal Habitats. *Annual Review of Ecology, Evolution, and*  
1568 *Systematics* 39:321–342. doi: 10.1146/annurev.ecolsys.38.091206.095622
- 1569 Kawecki TJ, Ebert D (2004) Conceptual issues in local adaptation. *Ecology Letters* 7:1225–  
1570 1241. doi: 10.1111/j.1461-0248.2004.00684.x
- 1571 Keightley PD, Eyre-Walker A (2010) What can we learn about the distribution of fitness effects  
1572 of new mutations from DNA sequence data? *Philos Trans R Soc Lond, B, Biol Sci*  
1573 365:1187–1193. doi: 10.1098/rstb.2009.0266
- 1574 Kempthorne O (1954) The Correlation between Relatives in a Random Mating Population.  
1575 *Proceedings of the Royal Society B: Biological Sciences* 143:103–113. doi:  
1576 10.1098/rspb.1954.0056
- 1577 Kimura M (1983) *The neutral theory of molecular evolution*. Cambridge University Press
- 1578 Kinloch Jr, B. B., Parks, G. K., & Fowler, C. W. (1970). White pine blister rust: simply inherited  
1579 resistance in sugar pine. *Science*, 193-195.
- 1580 Kirkpatrick M, Barton NH (1997) Evolution of a species' range. *The American Naturalist* 150:1–  
1581 23. doi: 10.1086/286054
- 1582 Kirkpatrick M, Barton NH (2006) Chromosome Inversions, Local Adaptation and Speciation.  
1583 *Genetics* 173:419–434. doi: 10.1534/genetics.105.047985
- 1584 Kopp M, Hermisson J (2009a) The Genetic Basis of Phenotypic Adaptation I: Fixation of  
1585 Beneficial Mutations in the Moving Optimum Model. *Genetics* 182:233–249. doi:  
1586 10.1534/genetics.108.099820

- 1587 Kopp M, Hermisson J (2009b) The genetic basis of phenotypic adaptation II: the distribution of  
1588 adaptive substitutions in the moving optimum model. *Genetics* 183:1453–1476. doi:  
1589 10.1534/genetics.109.106195
- 1590 Kopp M, Matuszewski S (2013) Rapid evolution of quantitative traits: theoretical perspectives.  
1591 *Evolutionary Applications* 7:169–191. doi: 10.1111/eva.12127
- 1592 Kremer A, Le Corre V (2012) Decoupling of differentiation between traits and their underlying  
1593 genes in response to divergent selection. *Heredity* 108:375–385. doi: 10.1038/hdy.2011.81
- 1594 Kremer A, Ronce O, Robledo-Arnuncio JJ, et al (2012). Long-distance gene flow and adaptation  
1595 of forest trees to rapid climate change. *Ecology Letters* 15:378–392.
- 1596 Krutovsky KV, Neale DB (2005) Nucleotide diversity and linkage disequilibrium in cold-  
1597 hardiness- and wood quality-related candidate genes in Douglas fir. *Genetics* 171:2029–  
1598 2041. doi: 10.1534/genetics.105.044420
- 1599 Lamichhaney S, Berglund J, Almén MS, et al (2015) Evolution of Darwin’s finches and their  
1600 beaks revealed by genome sequencing. *Nature* 518:371–375. doi: 10.1038/nature14181
- 1601 Lamy JB, Bouffier L, Burlett R, Plomion C, Cochard H, Delzon S (2011) Uniform selection as a  
1602 primary force reducing population genetic differentiation of cavitation resistance across a  
1603 species range. *PLoS One* 6:e23476.
- 1604 Lamy JB, Plomion C, Kremer A, Delzon S (2012)  $QST < FST$  as a signature of canalization.  
1605 *Molecular Ecology* 21:5646–5655.
- 1606 Lande R (1980) The genetic covariance between characters maintained by pleiotropic mutations.  
1607 *Genetics* 94:203–215.
- 1608 Lande R (2009) Adaptation to an extraordinary environment by evolution of phenotypic  
1609 plasticity and genetic assimilation. *Journal of Evolutionary Biology* 22:1435–1446. doi:  
1610 10.1111/j.1420-9101.2009.01754.x
- 1611 Lande R, Arnold S (1983) The measurement of selection on correlated characters. *Evolution*, 37,  
1612 1210–1226. doi: 10.1111/j.1558-5646.1983.tb00236.x
- 1613 Langlet O (1971) Two hundred years genecology. *Taxon* 20:653–721. doi: 10.2307/1218596
- 1614 Latta RG (1998) Differentiation of allelic frequencies at quantitative trait loci affecting locally  
1615 adaptive traits. *The American Naturalist* 151:283–292. doi: 10.1086/286119
- 1616 Latta RG (2003) Gene flow, adaptive population divergence and comparative population  
1617 structure across loci. *New Phytologist* 161:51–58. doi: 10.1046/j.1469-8137.2003.00920.x

- 1618 Laurent S, Pfeifer SP, Settles ML, et al (2016) The population genomics of rapid adaptation:  
1619 disentangling signatures of selection and demography in white sands lizards. *Molecular*  
1620 *Ecology* 25:306–323. doi: 10.1111/mec.13385
- 1621 Lauteri M, Pliura A, Monteverdi MC, Brugnoli E, Villani F, Eriksson G (2004) Genetic variation  
1622 in carbon isotope discrimination in six European populations of *Castanea sativa* Mill.  
1623 originating from contrasting localities. *Journal of evolutionary biology* 17:1286-1296.
- 1624 Le Corre V, Kremer A (2012) The genetic differentiation at quantitative trait loci under local  
1625 adaptation. *Molecular Ecology* 21:1548–1566. doi: 10.1111/j.1365-294X.2012.05479.x
- 1626 Le Rouzic A, Álvarez-Castro JM (2016) Epistasis-induced evolutionary plateaus in selection  
1627 responses. *American Naturalist* 188:E134–E150. doi: 10.1086/688893
- 1628 Leempoel, K., Duruz, S., Rochat, E., Widmer, I., Orozco-terWengel, P., & Joost, S. (2017).  
1629 Simple rules for an efficient use of Geographic Information Systems in molecular ecology.  
1630 *Frontiers in Ecology and Evolution* 5: 1-10.
- 1631 Legendre, P., & Legendre, L. F. (2012). *Numerical ecology* (Vol. 24). Elsevier.
- 1632 Leimu R, Fischer M (2008) A meta-analysis of local adaptation in plants. *PLoS ONE* 3:e4010.  
1633 doi: 10.1371/journal.pone.0004010.s001
- 1634 Leinonen T, McCairns RJS, O'Hara RB, Merilä J (2013) QST–FST comparisons: evolutionary  
1635 and ecological insights from genomic heterogeneity. *Nature Reviews Genetics* 14:179–190.  
1636 doi: 10.1038/nrg3395
- 1637 Leinonen PH, Sandring S, Quilot B, et al (2009). Local adaptation in european populations of  
1638 *Arabidopsis lyrata* (Brassicaceae). *American Journal of Botany* 96:1129–1137.
- 1639 Leiserson M, Eldridge JV, Ramachandran S (2013) Network analysis of GWAS data. *Current*  
1640 *opinion in Genetics and Development* 23:602-610 doi: 10.1016/j.gde.2013.09.003
- 1641 Leitch AR, Leitch IJ (2012) Ecological and genetic factors linked to contrasting genome  
1642 dynamics in seed plants. *New Phytologist* 194:629-646. doi: 10.1111/j.1469-  
1643 8137.2012.04105.x.
- 1644 Lenormand T (2002) Gene flow and the limits to natural selection. *Trends in Ecology &*  
1645 *Evolution* 17:183–189. doi: 10.1016/S0169-5347(02)02497-7
- 1646 Lewontin RC, Krakauer J (1973) Distribution of gene frequency as a test of the theory of the  
1647 selective neutrality of polymorphisms.
- 1648 Li Y, Suontoma M, Burdon RD, Dungey HS (2017) Genotype by environment interactions in

- 1649 forest tree breeding: review of methodology and perspectives on research and application.  
1650 Tree Genetics & Genomes 13:60. doi: 10.1007/s11295-017-1144-x
- 1651 Lind BM, Friedline CJ, Wegrzyn JL, et al (2017) Water availability drives signatures of local  
1652 adaptation in whitebark pine (*Pinus albicaulis* Engelm.) across fine spatial scales of the  
1653 Lake Tahoe Basin, USA. Molecular Ecology 26:3168–3185 doi: 10.1111/mec.14106
- 1654 Loehle C (1988) Tree life history strategies: the role of defenses. Canadian Journal of Forest  
1655 Research 18: 209-222.
- 1656 Long AD, Langley CH (1999) The power of association studies to detect the contribution of  
1657 candidate genetic loci to variation in complex traits. Genome Research 9:720-731.
- 1658 Lopez GA, Potts BM, Vaillancourt RE, Apiolaza LA (2003). Maternal and carryover effects on  
1659 early growth of Eucalyptus globulus. Canadian Journal of Forest Research, 33(11), 2108–  
1660 2115. <http://doi.org/10.1139/X03-132>
- 1661 Liu J-J (2017) Profiling methyl jasmonate-responsive transcriptome for understanding induced  
1662 systemic resistance in whitebark pine (*Pinus albicaulis*). Plant Mol Biol 0:0–0. doi:  
1663 10.1007/s11103-017-0655-z&domain=pdf
- 1664 Liu J-J, Schoettle AW, Sniezko RA, et al (2016) Genetic mapping of *Pinus flexilis* major gene  
1665 (Cr4) for resistance to white pine blister rust using transcriptome-based SNP genotyping.  
1666 BMC Genomics 17:1–12. doi: 10.1186/s12864-016-3079-2
- 1667 Lotterhos KE, Hodges K, Yeaman S, Degner J, Aitken S (2017) Modular environmental  
1668 pleiotropy of genes involved in local adaptation to climate despite physical linkage. bioRxiv  
1669 doi: <https://doi.org/10.1101/202481>
- 1670 Lotterhos KE, Whitlock MC (2014) Evaluation of demographic history and neutral  
1671 parameterization on the performance of  $F_{ST}$  outlier tests. Molecular Ecology 23:2178–2192.  
1672 doi: 10.1111/mec.12725
- 1673 Lotterhos KE, Whitlock MC (2015) The relative power of genome scans to detect local  
1674 adaptation depends on sampling design and statistical method. Molecular Ecology 24:1031–  
1675 1046.
- 1676 Lowry DB, Hoban S, Kelley JL, et al (2016) Breaking RAD: an evaluation of the utility of  
1677 restriction site-associated DNA sequencing for genome scans of adaptation. Molecular  
1678 Ecology Resources 17:142–152. doi: 10.1111/1755-0998.12635
- 1679 Lowry DB, Hoban S, Kelley JL, et al (2017) Responsible RAD: Striving for best practices in  
1680 population genomic studies of adaptation. Molecular Ecology Resources 17:366–369. doi:  
1681 10.1111/1755-0998.12677

- 1682 Lynch M, Walsh B (1998) Genetics and analysis of quantitative traits. Sinauer Sunderland, MA
- 1683 Mackay T (2001) The genetic architecture of quantitative traits. *Annual review of genetics*, **35**,  
1684 303–339.
- 1685 Mackay TFC (2014) Epistasis and quantitative traits: using model organisms to study gene-gene  
1686 interactions. *Nature Reviews Genetics* 15:22–33. doi: 10.1038/nrg3627
- 1687 Mackay TFC, Stone EA, Ayroles JF (2009) The genetics of quantitative traits: challenges and  
1688 prospects. *Nature Reviews Genetics* 10:565–577. doi: 10.1038/nrg2612
- 1689 MacPherson A, Hohenlohe PA, Nuismer SL (2015) Trait dimensionality explains widespread  
1690 variation in local adaptation. *Proc Biol Sci* 282:20141570–20141570. doi:  
1691 10.1098/rspb.2014.1570
- 1692 Mahalovich MF, Hipkins VD (2011) Molecular genetic variation in whitebark pine (*Pinus*  
1693 *albicaulis* Engelm.) in the Inland West. In: Keane, Robert E.; Tomback, Diana F.; Murray,  
1694 Michael P.; and Smith, Cyndi M., eds. 2011. The future of high-elevation, five-needle white  
1695 pines in Western North America: Proceedings of the High Five Symposium. 28-30 June  
1696 2010; Missoula, MT. Proceedings RMRS-P-63. Fort Collins, CO: U.S. Department of  
1697 Agriculture, Forest Service, Rocky Mountain Research Station. 376 p.
- 1698 Mähler N, Wang J, Terebieniec BK, et al (2017) Gene co-expression network connectivity is an  
1699 important determinant of selective constraint. *PLoS Genetics* 13:e1006402–33. doi:  
1700 10.1371/journal.pgen.1006402
- 1701 Mahler DL, Weber MG, Wagner CE, Ingram T (2017) Pattern and Process in the Comparative  
1702 Study of Convergent Evolution. *American Naturalist* 190:S13–S28. doi: 10.1086/692648
- 1703 Mäki-Tanila A, Hill WG (2014) Influence of gene interaction on complex trait variation with  
1704 multilocus models. *Genetics* 198:355–367. doi: 10.1534/genetics.114.165282
- 1705 Martin G, Lenormand T (2006) A general multivariate extension of Fisher's geometrical model  
1706 and the distribution of mutation fitness effects across species. *Evolution* 60:893–16. doi:  
1707 10.1554/05-412.1
- 1708 Martin G, Lenormand T (2008) The distribution of beneficial and fixed mutation fitness effects  
1709 close to an optimum. *Genetics* 179:907–916. doi: 10.1534/genetics.108.087122
- 1710 Matuszewski S, Hermisson J, Kopp M (2015) Catch me if you can: Adaptation from standing  
1711 genetic variation to a moving phenotypic optimum. *Genetics* 200:1255–1274. doi:  
1712 10.1534/genetics.115.178574/-/DC1
- 1713 Matuszewski S, Hermisson J, Kopp M (2014) Fisher's Geometric Model with a moving

- 1714 optimum. *Evolution* 68:2571–2588. doi: 10.1111/evo.12465
- 1715 Máttyás C (1996) Climatic adaptation of trees: rediscovering provenance tests. *Euphytica* 92:45–  
1716 54.
- 1717 Maynard Smith JH, Haigh J (1974) The hitch-hiking effect of a favourable gene. *Genetical*  
1718 *Research* 23:23–35.
- 1719 McCandlish DM, Stoltzfus A (2014) Modeling evolution using the probability of fixation:  
1720 history and implications. *The Quarterly review of biology* 89:225–252. doi: 10.1086/677571
- 1721 McKay JK, Latta RG (2002) Adaptive population divergence: markers, QTL and traits. *Trends in*  
1722 *Ecology & Evolution* 17:285–291.
- 1723 McKinney GJ, Larson WA, Seeb LW, Seeb JE (2017) RADseq provides unprecedented insights  
1724 into molecular ecology and evolutionary genetics: comment on Breaking RAD by Lowry et  
1725 al. (2016). *Molecular Ecology Resources* 17:356–361. doi: 10.1111/1755-0998.12649
- 1726 Meier JI, Sousa VC, Marques DA, et al (2016) Demographic modelling with whole-genome data  
1727 reveals parallel origin of similar *Pundamilia* cichlid species after hybridization. *Molecular*  
1728 *Ecology* 26:123–141. doi: 10.1111/mec.13838
- 1729 Messer PW, Petrov DA (2013) Population genomics of rapid adaptation by soft selective sweeps.  
1730 *Trends in Ecology & Evolution* 28:659–669. doi: 10.1016/j.tree.2013.08.003
- 1731 Meuwissen TH, Hayes BJ, Goddard ME. 2001. Prediction of total genetic value using genome-  
1732 wide dense marker maps. *Genetics* 157: 1819–1829.
- 1733 Mitton JB, Grant MC, Yoshino AM (1998) Variation in allozymes and stomatal size in pinyon  
1734 (*Pinus edulis*, Pinaceae), associated with soil moisture. *American Journal of Botany*  
1735 85:1262–1265.
- 1736 Mitton JB, Williams CG (2006) Gene Flow in Conifers. In: *Landscapes, Genomics, and*  
1737 *Transgenic Conifers*. (ed Williams CG), pp. 147–168. Springer Netherlands, Dordrecht.
- 1738 Mizrahi E, Verbeke L, Christie N, et al (2017) Network-based integration of systems genetics  
1739 data reveals pathways associated with lignocellulosic biomass accumulation and processing.  
1740 *Proc Natl Acad Sci* 114:1195–1200. doi: 10.1073/pnas.1620119114
- 1741 Moreno G (1994) Genetic architecture, genetic behavior, and character evolution. *Annual review*  
1742 *of ecology and systematics* 25:31–44.
- 1743 Morgenstern EK (1996) Geographic variation in forest trees: genetic basis and application of  
1744 knowledge in silviculture. UBC press.



- 1745 Morse AM, Peterson DG, Islam-Faridi MN, et al (2009) Evolution of genome size and  
1746 complexity in *Pinus*. PLoS ONE 4:e4332.
- 1747 Moser G, Lee SH, Hayes BJ, Goddard ME, Wray NR, Visscher PM (2015) Simultaneous  
1748 discovery, estimation and prediction analysis of complex traits using a Bayesian mixture  
1749 model. PLoS Genetics, 11, e1004969.
- 1750 Namkoong G (1979) Introduction to Quantitative Genetics in Forestry. Technical Bulletin No.  
1751 1588. Washington, D. C. USDA Forest Service. 342 pp.
- 1752 Neale DB, Kremer A. (2011). Forest tree genomics: growing resources and applications. Nature  
1753 Reviews Genetics 12:111–122.
- 1754 Neale DB, Langley CH, Salzberg SL, Wegrzyn JL (2013) Open access to tree genomes: the path  
1755 to a better forest. Genome Biology 14:6 14:120. doi: 10.1186/gb-2013-14-6-120
- 1756 Neale DB, Martínez-García PJ, La Torre De AR, et al (2017) Novel Insights into Tree Biology  
1757 and Genome Evolution as Revealed Through Genomics. Ann Rev of Plant Biol 68:457–483.  
1758 doi:10.1146/annurev-arplant-042916-041049
- 1759 Neale DB, Savolainen O (2004) Association genetics of complex traits in conifers. Trends in  
1760 Plant Science 9:325–330.
- 1761 Nelson RM, Pettersson ME, Carlborg Ö (2013) A century after Fisher: time for a new paradigm  
1762 in quantitative genetics. Trends in Genetics 29:669–676. doi: 10.1016/j.tig.2013.09.006
- 1763 Nilsson-Ehle H (1909) Kreuzungsuntersuchungen an Hafer und Weizen. Lunds Universitets  
1764 Arsskrift 5:1–122.
- 1765 Nystedt B, Street NR, Wetterbom A, et al. (2013) The Norway spruce genome sequence and  
1766 conifer genome evolution. Nature 497:570-584.
- 1767 Ohta T (1982) Linkage disequilibrium with the island model. Genetics 101:139–155.
- 1768 Ohta, T. 1992. The nearly neutral theory of molecular evolution. Annu. Rev. Ecol. Syst. 23:263-  
1769 286.
- 1770 Ohta, T. 1996. The current significance and standing of neutral and nearly neutral theories.  
1771 BioEssays 18: 673-684.
- 1772 Oldfield, S., Lusty, C., & MacKinven, A. (1998). The world list of threatened trees. World  
1773 Conservation Press.
- 1774 Orr HA (1998) The population genetics of adaptation: the distribution of factors fixed during  
1775 adaptive evolution. Evolution 52:935. doi: 10.2307/2411226

- 1776 Orr HA (2005) The genetic theory of adaptation: a brief history. *Nature Reviews Genetics*  
1777 6:119–127. doi: 10.1038/nrg1523
- 1778 Orr HA (2003) The Distribution of Fitness Effects Among Beneficial Mutations. *Genetics*  
1779 163:1519–1526. doi: 10.1101/SQB.1951.016.01.026
- 1780 Orr HA (2006) The distribution of fitness effects among beneficial mutations in Fisher's  
1781 geometric model of adaptation. *J Theor Biol* 238:279–285. doi: 10.1016/j.jtbi.2005.05.001
- 1782 Orr HA (2001) The “sizes” of mutations fixed in phenotypic evolution: a response to Clarke and  
1783 Arthur. *Evolution & Development* 3:121–123. doi: 10.1046/j.1525-142x.2001.003003121.x
- 1784 Orr HA (2000) Adaptation and the cost of complexity. *Evolution* 54:13–20. doi: 10.1111/j.0014-  
1785 3820.2000.tb00002.x
- 1786 Ortiz-Barrientos D, Engelstädter J, Rieseberg LH (2016) Recombination Rate Evolution and the  
1787 Origin of Species. *Trends in Ecology & Evolution* 31:226–236. doi:  
1788 10.1016/j.tree.2015.12.016
- 1789 Ovaskainen O, Karhunen M, Zheng CH, Cano Arias JM, Merilä J (2011) A new method to  
1790 uncover signatures of divergent and stabilizing selection in quantitative traits. *Genetics*  
1791 189:621–632.
- 1792 Paaby AB, Rockman MV (2013) The many faces of pleiotropy. *Trends in Genetics* 29:66–73.  
1793 doi: 10.1016/j.tig.2012.10.010
- 1794 Paixão T, Barton NH (2016) The effect of gene interactions on the long-term response to  
1795 selection. *Proc Natl Acad Sci USA* 113:4422–4427. doi: 10.1073/pnas.1518830113
- 1796 Palmé AE, Pyhajarvi T, Wachowiak W, Savolainen O (2009) Selection on Nuclear Genes in a  
1797 *Pinus* Phylogeny. *Molecular Biology and Evolution* 26:893–905. doi:  
1798 10.1093/molbev/msp010
- 1799 Parchman TL, Gompert Z, Mudge J, et al (2012) Genome-wide association genetics of an  
1800 adaptive trait in lodgepole pine. *Molecular Ecology* 21:2991–3005. doi: 10.1111/j.1365-  
1801 294X.2012.05513.x
- 1802 Parchman TL, Jahner JP, Uckele K, Galland LM (in review) RADseq approaches and  
1803 applications for forest tree genetics.
- 1804 Pavlidis P, Metzler D, Stephan W (2012) Selective sweeps in multilocus models of quantitative  
1805 traits. *Genetics* 192:225–239. doi: 10.1534/genetics.112.142547
- 1806 Patterson HD, Thompson R (1971) Recovery of interblock information when block sizes are

- 1807           unequal. *Biometrika* 58:545-554.
- 1808   Pennings PS, Hermisson J (2006a) Soft sweeps III: the signature of positive selection from  
1809           recurrent mutation. *PLoS Genetics* 2:e186. doi: 10.1371/journal.pgen
- 1810   Pennings PS, Hermisson J (2006b) Soft Sweeps II--Molecular Population Genetics of Adaptation  
1811           from Recurrent Mutation or Migration. *Molecular Biology and Evolution* 23:1076–1084.  
1812           doi: 10.1093/molbev/msj117
- 1813   Petit RJ, Hampe A (2006) Some evolutionary consequences of being a tree. *Annual review of*  
1814           *ecology* 37:187–214.
- 1815   Phillips PC (2008) Epistasis—the essential role of gene interactions in the structure and  
1816           evolution of genetic systems. *Nature Reviews Genetics* 9:855–867.
- 1817   Piepho HP, Möhring J, Melchinger AE, Büchse A (2008) BLUP for phenotypic selection in plant  
1818           breeding and variety testing. *Euphytica* 161:209-228.
- 1819   Pickrell JK, Berisa T, Liu JZ, Séguérel L (2016) Detection and interpretation of shared genetic  
1820           influences on 42 human traits. *Nature Genetics* 48:709–717. doi: 10.1038/ng.3570
- 1821   Platt A, Vilhjalmsón BJ, Nordborg M (2010) Conditions under which genome-wide association  
1822           studies will be positively misleading. *Genetics* 186:1045-1052.
- 1823   Plomion C, Bastien C, Bogeat-Triboulot M-B, et al (2016) Forest tree genomics: 10  
1824           achievements from the past 10 years and future prospects. *Annals of Forest Science* 73:77–  
1825           103. doi: 10.1007/s13595-015-0488-3
- 1826   Postma FM, Ågren J (2016) Early life stages contribute strongly to local adaptation in  
1827           *Arabidopsis thaliana*. *Proceedings of the National Academy of Sciences* 113:7590–7595.  
1828           doi: 10.1073/pnas.1606303113
- 1829   Price AL, Patterson NJ, Plenge RM, Weinblatt ME, Shadick NA, Reich D (2006) Principal  
1830           components analysis corrects for stratification in genome-wide association studies. *Nature*  
1831           *Genetics* 38:904-909.
- 1832   Prout T, Barker JSF (1993) *F* statistics in *Drosophila buzzatii*: selection, population size and  
1833           inbreeding. *Genetics* **134**: 369–375.
- 1834   Prunier J, Laroche J, Beaulieu J, Bousquet J (2011) Scanning the genome for gene SNPs related  
1835           to climate adaptation and estimating selection at the molecular level in boreal black spruce.  
1836           *Molecular Ecology* 20:1702–1716. doi: 10.1111/j.1365-294X.2011.05045.x
- 1837   Prunier J, Verta J-P, MacKay JJ (2015) Conifer genomics and adaptation: at the crossroads of  
1838           genetic diversity and genome function. *New Phytologist* 209:44–62.

- 1839 Quesada, T., Li, Z., Dervinis, C., et al. (2008). Comparative analysis of the transcriptomes of  
1840 *Populus trichocarpa* and *Arabidopsis thaliana* suggests extensive evolution of gene  
1841 expression regulation in angiosperms. *New Phytologist* 180:408–420.
- 1842 Ralph P, Coop G (2010) Parallel adaptation: one or many waves of advance of an advantageous  
1843 allele? *Genetics* 186:647–668. doi: 10.1534/genetics.110.119594
- 1844 Rellstab C, Gugerli F, Eckert AJ, et al (2015) A practical guide to environmental association  
1845 analysis in landscape genomics. *Molecular Ecology* 24:4348–4370. doi: 10.1111/mec.13322
- 1846 Remington DL (2015) Alleles versus mutations: Understanding the evolution of genetic  
1847 architecture requires a molecular perspective on allelic origins. *Evolution* 69:3025–3038.  
1848 doi: 10.1111/evo.12775
- 1849 Resende et al. (2012a) Accelerating the domestication of trees using genomic selection: accuracy  
1850 of prediction models across ages and environments. *New Phytologist* 193: 617-624.
- 1851 Resende et al. (2012b) Genomic selection for growth and wood quality in Eucalyptus: capturing  
1852 the missing heritability and accelerating breeding for complex traits in forest trees. *New*  
1853 *Phytologist* 194: 116-128.
- 1854 Resende et al. (2012c) Accuracy of genomic selection methods in a standard data set of loblolly  
1855 pine (*Pinus taeda* L.). *Genetics* 190: 1503-1510.
- 1856 Riesch R, Muschick M, Lindtke D, et al (2017) Transitions between phases of genomic  
1857 differentiation during stick-insect speciation. *Nat ecol evol* 1:1–13. doi: 10.1038/s41559-  
1858 017-0082
- 1859 Ritland, K., Krutovsky, K.V., Tsumura, Y., Pelgas, B., Isabel, N. and Bousquet, J., 2011. Genetic  
1860 mapping in conifers. In: *Genetics, genomics and breeding of conifers*, pp.196-238.
- 1861 Ritland K, Ritland C (1996) Inferences about quantitative inheritance based on natural  
1862 population structure in the yellow monkeyflower, *Mimulus guttatus*. *Evolution* 50:1074-  
1863 1082.
- 1864 Rockman, M. V. (2012, January). The QTN program and the alleles that matter for evolution: All  
1865 that’s gold does not glitter. *Evolution* 66:1-17.
- 1866 Rodríguez-Quilón I, Santos-del-Blanco L, Serra-Varela MJ, Koskela J, González-Martínez SC,  
1867 Alía R (2016) Capturing neutral and adaptive genetic diversity for conservation in a highly  
1868 structured tree species. *Ecological Applications* 26:2254-2266. doi:
- 1869 Romero IG, Ruvinsky I, Gilad Y (2012) Comparative studies of gene expression and the  
1870 evolution of gene regulation. *Nature Publishing Group* 13:505–516. doi: 10.1038/nrg3229

- 1871 Roschanski AM, Csilléry K, Liepelt S et al (2016) Evidence of divergent selection at landscape  
1872 and local scales in *Abies alba* Mill. in the French Mediterranean Alps. *Molecular Ecology*  
1873 25:776-794.
- 1874 Savolainen O, Lascoux M, Merilä J (2013) Ecological genomics of local adaptation. *Nature*  
1875 *Reviews Genetics* 14:807–820. doi: 10.1038/nrg3522
- 1876 Savolainen O, Pyhäjärvi T, Knürr T (2007) Gene Flow and Local Adaptation in Trees. *Annual*  
1877 *Review of Ecology, Evolution, and Systematics* 38:595–619. doi:  
1878 10.1146/annurev.ecolsys.38.091206.095646
- 1879 Schoville SD, Bonin A, Francois O, et al (2012) Adaptive Genetic Variation on the Landscape:  
1880 Methods and Cases. *Annual Review of Ecology, Evolution, and Systematics* 43:23–43. doi:  
1881 10.1146/annurev-ecolsys-110411-160248
- 1882 Schrider DR, Kern AD (2016) S/HIC: Robust Identification of Soft and Hard Sweeps Using  
1883 Machine Learning. *PLoS Genetics* 12:e1005928–31. doi: 10.1371/journal.pgen.1005928
- 1884 Schrider DR, Mendes FK, Hahn MW, Kern AD (2015) Soft shoulders ahead: spurious signatures  
1885 of soft and partial selective sweeps result from linked hard sweeps. *Genetics* 200:267–284.  
1886 doi: 10.1534/genetics.115.174912/-/DC1
- 1887 Schrider DR, Shanku AG, Kern AD (2016) Effects of linked selective sweeps on demographic  
1888 inference and model selection. *Genetics* 204:1207–1223. doi:  
1889 10.1534/genetics.116.190223/-/DC1
- 1890 Searle SR, Casella G, McCulloch CE (1992) *Variance Components*. New York, NY: John Wiley  
1891 & Sons, Inc. 528 pp.
- 1892 Silva-Junior O, Faria DA, Grattapaglia D (2015) A flexible multi-species genome-wide 60K  
1893 SNP chip developed from pooled resequencing of 240 Eucalyptus tree genomes across 12  
1894 species. *New Phytologist* 206:1527-1540. doi: 10.1111/nph.13322
- 1895 Simons YB, Bullaughey K, Hudson RR, Sella G (2017) A model for the genetic architecture of  
1896 quantitative traits under stabilizing selection. *bioRxiv* 1–76. doi: arXiv:1704.06707
- 1897 Siol M, Wright S, Barrett S (2010) The population genomics of plant adaptation. *New*  
1898 *Phytologist* 188: 313-332.
- 1899 Slate J (2005) Quantitative trait locus mapping in natural populations: progress, caveats and  
1900 future directions. *Molecular Ecology* 14:363–379. doi: 10.1111/j.1365-294X.2004.02378.x
- 1901 Slatkin M (1987) Gene flow and the geographic structure of natural populations. *Science*  
1902 236:787–793. doi: 10.1126/science.3576198

- 1903 Slatkin M (1975) Gene flow and selection in a two-locus system. *Genetics* 81:787–802.
- 1904 Smith SD (2016) Pleiotropy and the evolution of floral integration. *New Phytologist* 209:80–85.  
1905 doi: 10.1111/nph.13583
- 1906 Sork VL, Aitken SN, Dyer RJ, et al (2013) Putting the landscape into the genomics of trees:  
1907 approaches for understanding local adaptation and population responses to changing  
1908 climate. *Tree Genetics & Genomes* 9:901–911. doi: 10.1007/s11295-013-0596-x
- 1909 Speed, D., & Balding, D. J. (2014). MultiBLUP: improved SNP-based prediction for complex  
1910 traits. *Genome Research*, 24(9), 1550–1557. <http://doi.org/10.1101/gr.169375.113>
- 1911 Spitze K (1993) Population structure in *Daphnia obtusa*: quantitative genetic and allozyme  
1912 variation. *Genetics* 135:367-374.
- 1913 Spencer CCA, Su Z, Donnelly P, Marchini J (2009) Designing genome-wide association studies:  
1914 sample size, power, imputation, and the choice of genotyping chip. *PLoS Genetics*  
1915 5:e1000477.
- 1916 St Clair JB, Mandel NL, Vance-Borland KW (2005) Genecology of Douglas fir in western  
1917 Oregon and Washington. *Annals of Botany* 96:1199–1214.
- 1918 Stephan, W. (2010) Genetic hitchhiking versus background selection: the controversy and its  
1919 implications. *Philos Trans R Soc Lond B Biol Sci* 365: 1245-1253.
- 1920 Stephan W (2015) Signatures of positive selection: from selective sweeps at individual loci to  
1921 subtle allele frequency changes in polygenic adaptation. *Molecular Ecology* 25:79–88. doi:  
1922 10.1111/mec.13288
- 1923 Stephens M, Balding DJ (2009) Bayesian statistical methods for genetic association studies.  
1924 *Nature Reviews Genetics* 10:681-690.
- 1925 Stinchcombe JR, Hoekstra HE (2008) Combining population genomics and quantitative genetics:  
1926 finding the genes underlying ecologically important traits. *Heredity* 100:158–170. doi:  
1927 10.1038/sj.hdy.6800937
- 1928 Stölting KN, Paris M, Meier C, Heinze B, Castiglione S, Bartha D, Lexer C (2015) Genome-  
1929 wide patterns of differentiation and spatially varying selection between postglacial  
1930 recolonization lineage of *Populus alba* (Salicaceae), a widespread forest tree. *New*  
1931 *Phytologist* 207:723-734. doi: 10.1111/nph.13392
- 1932 Storey JD, Tibshirani R (2003) Statistical significance for genomewide studies. *Proceedings of*  
1933 *the National Academy of Sciences of the United States of America* 100:9440-9445.

- 1934 Strickler SR, Bombarely A, Mueller LA (2012) Designing a transcriptome next-generation  
1935 sequencing project for a nonmodel plant species1. *American Journal of Botany* 99:257–266.  
1936 doi: 10.3732/ajb.1100292
- 1937 Suren H, Hodgins KA, Yeaman S, Nurkowski KA, Smets P, Rieseberg LH, Aitken SN, Holliday  
1938 JA (2016) Exome capture from the spruce and pine giga-genomes. *Molecular Ecology*  
1939 16:1136-1146.
- 1940 Tan, B., Grattapaglia, D., Wu, H. X., & Ingvarsson, P. K. (2017). Genomic prediction reveals  
1941 significant non-additive effects for growth in hybrid *Eucalyptus*. *bioRxiv*, 1–35.  
1942 <http://doi.org/10.1101/178160>
- 1943 Temesgen B, Brown GR, Harry DE, Kinlaw CS, Sewell MM, Neale DB (2001) Genetic mapping  
1944 of expressed sequence tag polymorphism (ESTP) markers in loblolly pine (*Pinus taeda* L.).  
1945 *Theor Appl Genet* 102:664–675
- 1946 Tenaillon O (2014) The Utility of Fisher's Geometric Model in Evolutionary Genetics. *Annual*  
1947 *Review of Ecology, Evolution, and Systematics* 45:179–201. doi: 10.1146/annurev-ecolsys-  
1948 120213-091846
- 1949 Thavamanikumar S, Southerton SG, Bossinger G, Thumma BR (2013) Dissection of complex  
1950 traits in forest trees — opportunities for marker-assisted selection. *Tree Genetics &*  
1951 *Genomes* 9:627–639. doi: 10.1007/s11295-013-0594-z
- 1952 Tiffin P, Ross-Ibarra J (2014) Advances and limits of using population genetics to understand  
1953 local adaptation. *Trends in Ecology & Evolution* 29:673–680. doi:  
1954 10.1016/j.tree.2014.10.004
- 1955 Tigano A, Friesen VL (2016) Genomics of local adaptation with gene flow. *Molecular Ecology*  
1956 25:2144–2164. doi: 10.1111/mec.13606
- 1957 Timpson NJ, Greenwood CMT, Soranzo N, et al (2017) Genetic architecture: the shape of the  
1958 genetic contribution to human traits and disease. *Nature Publishing Group* 1–15. doi:  
1959 10.1038/nrg.2017.101
- 1960 Turelli M, Barton NH (1994) Genetic and statistical analyses of strong selection on polygenic  
1961 traits: what, me normal? *Genetics* 138:913–941.
- 1962 Vasquez-Gross, H. A., Yu, J. J., Figueroa, B., Gessler, D. D., Neale, D. B., & Wegrzyn, J. L.  
1963 (2013). CartograTree: connecting tree genomes, phenotypes and environment. *Molecular*  
1964 *Ecology Resources* 13: 528-537.
- 1965 Via S, Lande R (1985) Genotype-environment interaction and the evolution of phenotypic

- 1966 plasticity. *Evolution* 39:505–522. doi: 10.1111/j.1558-5646.1985.tb00391.x
- 1967 Vialette-Guiraud ACM, Andres-Robin A, Chambrier P, et al (2016) The analysis of Gene  
1968 Regulatory Networks in plant evo-devo. *Journal of Experimental Botany* 67:2549–2563.  
1969 doi: 10.1093/jxb/erw119
- 1970 Vitezica ZG, Legarra A, Toro MA, Varona L (2017) Orthogonal Estimates of Variances for  
1971 Additive, Dominance, and Epistatic Effects in Populations. *Genetics* 206:1297–1307. doi:  
1972 10.1534/genetics.116.199406
- 1973 Vizcaino-Palomar N, Revuelta-Eugercios B, Zavala MA, Alia R, González-Martínez SC (2014)  
1974 The role of population origin and microenvironment in seedling emergence and early  
1975 survival in Mediterranean maritime pine (*Pinus pinaster* Aiton). *PLoS ONE* 9:e109132.
- 1976 Wachowiak W, Trivedi U, Perry A, Cavers S (2015) Comparative transcriptomics of a complex  
1977 of four European pine species. *BMC Genomics* 16:1–9. doi: 10.1186/s12864-015-1401-z
- 1978 Wadgyman SM, Lowry DB, Gould BA, et al (2017) Identifying targets and agents of selection:  
1979 innovative methods to evaluate the processes that contribute to local adaptation. *Methods in*  
1980 *Ecology and Evolution* 8:738–749. doi: 10.1111/2041-210X.12777
- 1981 Wagner GP, Altenberg L (1996) Perspective: complex adaptations and the evolution of  
1982 evolvability. *Evolution* 50:967. doi: 10.2307/2410639
- 1983 Wagner GP, Kenney-Hunt JP, Pavlicev M, et al (2008) Pleiotropic scaling of gene effects and  
1984 the “cost of complexity.” *Nature* 452:470–472. doi: 10.1038/nature06756
- 1985 Wagner GP, Pavlicev M, Cheverud JM (2007) The road to modularity. *Nature Reviews Genetics*  
1986 8:921–931. doi: 10.1038/nrg2267
- 1987 Wagner GP, Zhang J (2011) The pleiotropic structure of the genotype–phenotype map: the  
1988 evolvability of complex organisms. *Nature Publishing Group* 12:204–213. doi:  
1989 10.1038/nrg2949
- 1990 Wang L, Beissinger TM, Lorant A, Ross-Ibarra C, Ross-Ibarra J, Hufford M (2017) The  
1991 interplay of demography and selection during maize domestication and expansion. *bioRxiv*  
1992 doi: <https://doi.org/10.1101/114579>
- 1993 Wang Z, Liao BY, Zhang J (2010) Genomic patterns of pleiotropy and the evolution of  
1994 complexity. *Proceedings of the National Academy of Science* 107:18034–18039. doi:  
1995 10.1073/pnas.1004666107
- 1996 Wegrzyn JL, Lee JM, Tarse BR, Neale DB (2008) TreeGenes: A Forest Tree Genome  
1997 Database. *International Journal of Plant Genomics* 2008:1–7. doi: 10.1155/2008/412875



- 1998 Wegrzyn JL, Main D, Figueroa B, et al (2012) Uniform standards for genome databases in forest  
1999 and fruit trees. *Tree Genetics & Genomes* 8:549–557. doi: 10.1007/s11295-012-0494-7
- 2000 Welch JJ, Waxman D (2003) Modularity and the cost of complexity. *Evolution* 57:1723–13. doi:  
2001 10.1554/02-673
- 2002 Wellenreuther M, Hansson B (2016) Detecting Polygenic Evolution: Problems, Pitfalls,  
2003 and Promises. *Trends in Genetics* 32:155–164. doi: 10.1016/j.tig.2015.12.004
- 2004 Whitlock MC (1999) Neutral additive genetic variance in a metapopulation. *Genetical Research*  
2005 74:215–221.
- 2006 Whitlock MC (2003) Fixation probability and time in subdivided populations. *Genetics* 164:767–  
2007 779.
- 2008 Whitlock MC, Gilbert KJ (2012)  $Q_{ST}$  in a hierarchically structured population. *Molecular*  
2009 *Ecology Resources* 12:481–483.
- 2010 Whitlock, M. C. and F. Guillaume. 2009. Testing for spatially divergent selection: Comparing  
2011  $Q_{ST}$  to  $F_{ST}$ . *Genetics* 183: 1055-1063.
- 2012 Whitlock MC, Lotterhos KE (2015) Reliable detection of loci responsible for local adaptation:  
2013 Inference of a null model through trimming the distribution of  $F_{ST}$ . *The American Naturalist*  
2014 186:S24–S36. doi: 10.1086/682949
- 2015 Whitlock MC, Phillips PC, Moore FB (1995) Multiple fitness peaks and epistasis. *Annual*  
2016 *Review of Ecology and Systematics* 26:601–629. doi: annurev.es.26.110195.003125
- 2017 Wong CK, Bernardo R (2008) Genomewide selection in oil palm: increasing selection gain per  
2018 unit time and cost with small populations. *Theor Appl Genet* 116: 815–824.
- 2019 Wortley, A. H., & Scotland, R. W. (2004). Synonymy, sampling and seed plant numbers. *Taxon*,  
2020 53(2), 478-480.
- 2021 Wright S (1932) The roles of mutation, inbreeding, crossbreeding, and selection in evolution.  
2022 *Proceedings of the Sixth International Congress on Genetics*, Vol. 1, No. 6. (1932), pp. 356-  
2023 366.
- 2024 Wright S (1931) Evolution in Mendelian populations. *Genetics* 16:97–159.
- 2025 Xu S (2003) Theoretical Basis of the Beavis Effect. *Genetics* 165:2259–2268. doi:  
2026 10.1038/hdy.1992.131
- 2027 Yang J, Benyamin B, McEvoy BP, et al (2010) Common SNPs explain a large proportion of the  
2028 heritability for human height. *Nature Genetics* 42:565–569. doi: 10.1038/ng.608

- 2029 Yang, J., S. Mezmouk, A. Baumgarten, E. S. Buckler, K. E. Guill, M. D. McMullen, and J. Ross-  
2030 Ibarra. 2017. Incomplete dominance of deleterious alleles contribute substantially to trait  
2031 variation and heterosis in maize. bioRxiv. Doi: <https://doi.org/10.1101/086132>
- 2032 Yeaman S (2013) Genomic rearrangements and the evolution of clusters of locally adaptive loci.  
2033 Proceedings of the National Academy of Sciences 110:E1743–51. doi:  
2034 [10.1073/pnas.1219381110](https://doi.org/10.1073/pnas.1219381110)
- 2035 Yeaman S (2015) Local Adaptation by Alleles of Small Effect. The American Naturalist  
2036 186:S74–S89. doi: [10.1086/682405](https://doi.org/10.1086/682405)
- 2037 Yeaman S, Hodgins KA, Lotterhos KE, et al (2016) Convergent local adaptation to climate in  
2038 distantly related conifers. Science 353:1431–1433. doi: [10.1126/science.aaf7812](https://doi.org/10.1126/science.aaf7812)
- 2039 Yeaman S, Jarvis A (2006) Regional heterogeneity and gene flow maintain variance in a  
2040 quantitative trait within populations of lodgepole pine. Proceedings of the Royal Society B:  
2041 Biological Sciences 273:1587–1593. doi: [10.1534/genetics.166.2.1053](https://doi.org/10.1534/genetics.166.2.1053)
- 2042 Yeaman S, Otto SP (2011) Establishment and maintenance of adaptive genetic divergence under  
2043 migration, selection, and drift. Evolution 65:2123–2129. doi: [10.1111/j.1558-  
2044 5646.2011.01277.x](https://doi.org/10.1111/j.1558-5646.2011.01277.x)
- 2045 Yeaman S, Whitlock MC (2011) The genetic architecture of adaptation under migration-  
2046 selection balance. Evolution 65:1897–1911. doi: [10.1111/j.1558-5646.2011.01269.x](https://doi.org/10.1111/j.1558-5646.2011.01269.x)
- 2047 Yoder JB, Tiffin P (2017) Effects of Gene Action, Marker Density, and Timing of Selection on  
2048 the Performance of Landscape Genomic Scans of Local Adaptation. Journal of Heredity 1–  
2049 13. doi: [10.1093/jhered/esx042](https://doi.org/10.1093/jhered/esx042)
- 2050 Yu J, Pressoir G, Briggs WH, Vroh Bi I, Yamasaki M et al. (2005) A unified mixed-model  
2051 method for association mapping that accounts for multiple levels of relatedness. Nature  
2052 Genetics 38:203–208.
- 2053 Zhang X-S (2012) Fisher's geometric model of fitness landscape and variance in fitness within a  
2054 changing environment. Evolution 66:2350–2368. doi: [10.1111/j.1558-5646.2012.01610.x](https://doi.org/10.1111/j.1558-5646.2012.01610.x)
- 2055 Zhang M, Zhou L, Bawa R, Suren H, Holliday JA (2016) Recombination rate variation,  
2056 hitchhiking, and demographic history shape deleterious load in poplar. Molecular Biology  
2057 and Evolution. 33:2899–2910. doi: <https://doi.org/10.1093/molbev/msw169>
- 2058 Zhong S, Dekkers JC, Fernando RL, Jannink JL (2009) Factors affecting accuracy from genomic  
2059 selection in populations derived from multiple inbred lines: a barley case study. Genetics  
2060 182: 355–364.

- 2061 Zhou, X., Carbonetto, P., & Stephens, M. (2013). Polygenic modeling with Bayesian sparse  
2062 linear mixed models. *PLoS Genetics*, 9(2), e1003264.  
2063 <http://doi.org/10.1371/journal.pgen.1003264>
- 2064 Zinkgraf M, Liu L, Groover A, Filkov V (2017) Identifying gene coexpression networks  
2065 underlying the dynamic regulation of wood-forming tissues in *Populus* under diverse  
2066 environmental conditions. *New Phytologist* 214:1464–1478. doi: 10.1111/nph.14492
- 2067 Zöllner S, Pritchard JK (2007) Overcoming the Winner’s Curse: Estimating Penetrance  
2068 Parameters from Case-Control Data. *The American Journal of Human Genetics* 80:605–615.  
2069 doi: 10.1086/512821
- 2070 Zuk O, Hechter E, Sunyaev SR (2012) The mystery of missing heritability: Genetic interactions  
2071 create phantom heritability. *Proceedings of the National Academy of Science* 109:1193–1198.  
2072 doi: 10.1073/pnas.1119675109/-/DCSupplemental

2073 **Author Contributions**

2074 BML and AJE conceived the review, with contributions from MM, CEB, and TMF. BML, MM,  
2075 CEB, and TMF contributed to the literature search and survey which was analyzed by BML.  
2076 CEB summarized  $Q_{ST}$  and  $F_{ST}$  comparisons. BML wrote the manuscript with contributions from  
2077 MM and AJE. All authors contributed to the editing of the manuscript.

2078 **Figures**  
2079 **Figure 1**

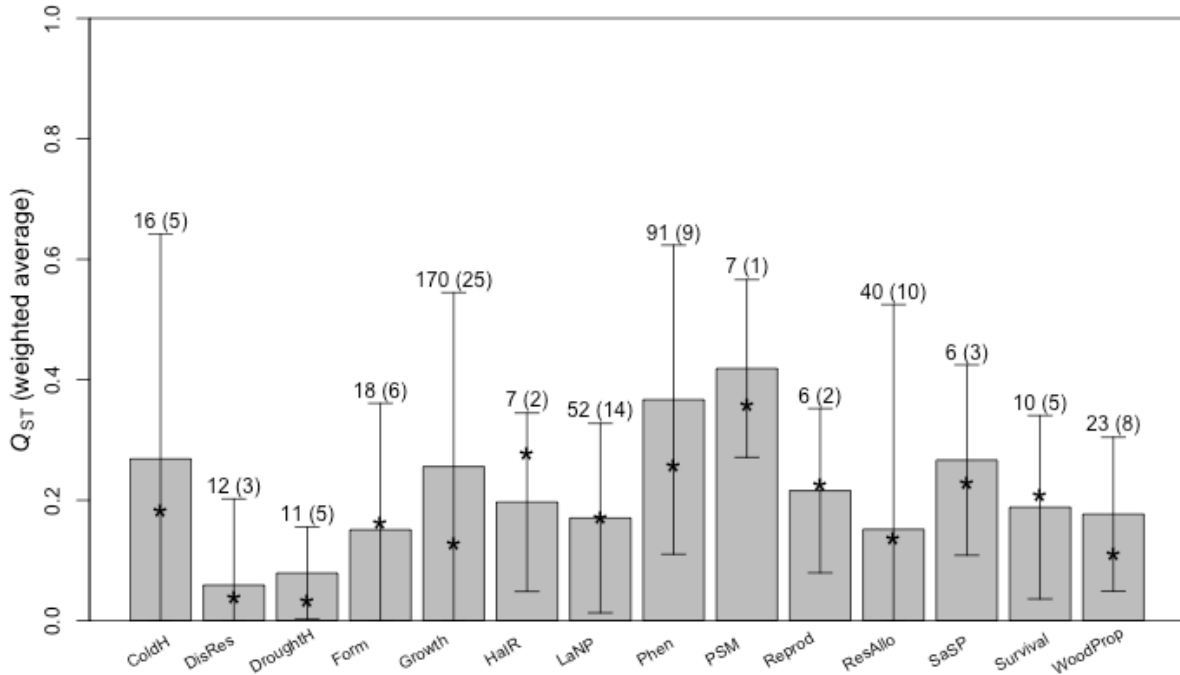

2080  
2081 **Figure 1.** Average  $Q_{ST}$  for each of 14 trait categories from literature review calculated by  
2082 weighting each estimate by the number of families used in the estimation. Error bars represent  
2083 the standard deviation of the weighted averages. Numbers above error bars represent total  
2084 number of estimates, with total number of unique species in parentheses. Asterisks indicate  
2085 median values of the unweighted  $Q_{ST}$  distribution. ColdH = cold hardiness, DisRes = disease  
2086 resistance, DroughtH = drought hardiness, HaIR = herbivore and insect resistance, LaNP = leaf  
2087 and needle properties, Phen = phenology, PSM = plant secondary metabolites, Reprod =  
2088 reproduction, ResAllo = resource allocation, SaSP = seed and seedling properties, WoodProp =  
2089 wood properties.

2090 **Figure 2**

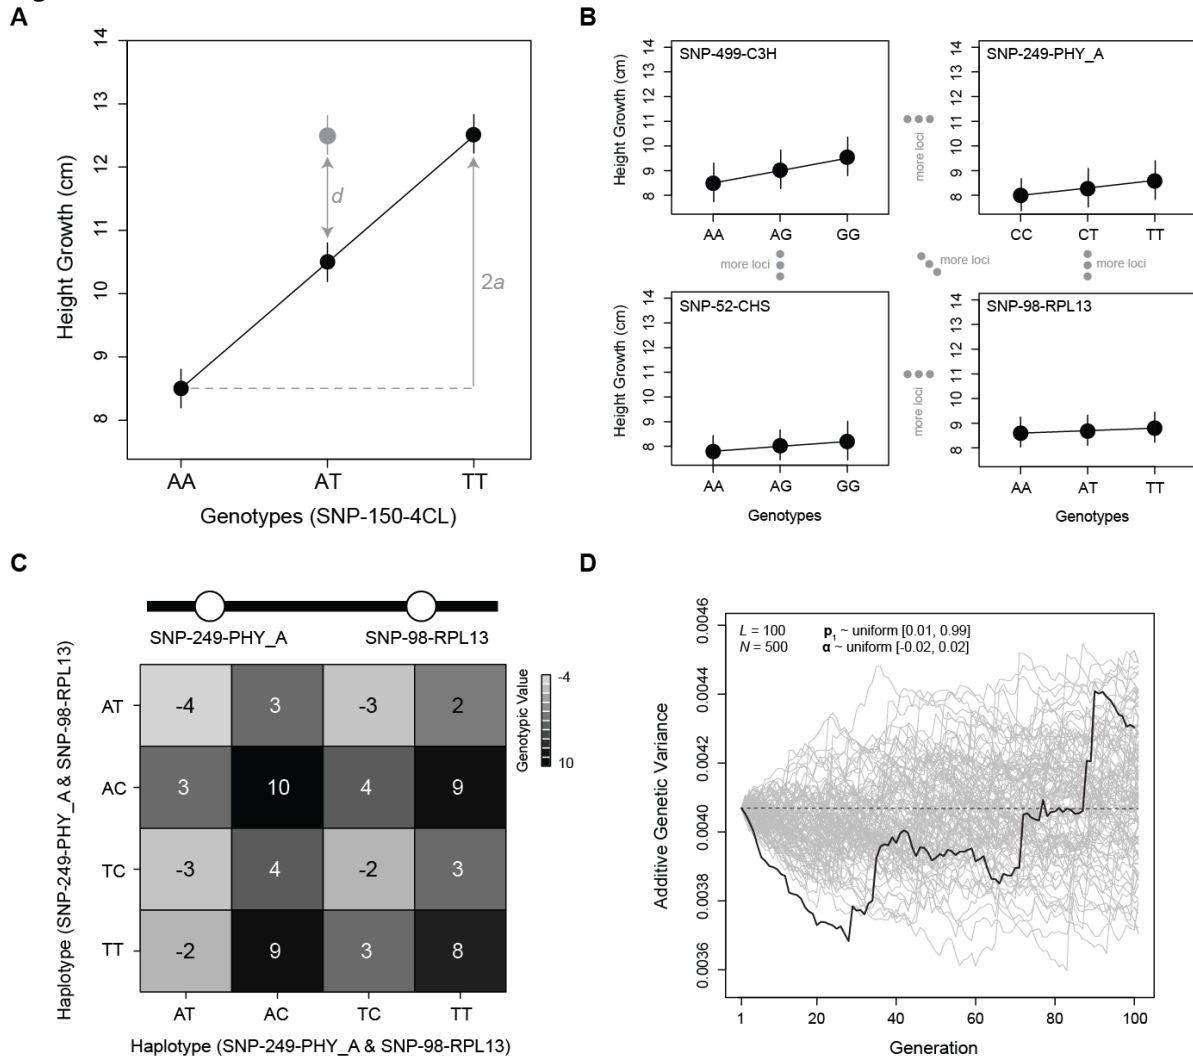

2091  
 2092 **Figure 2.** Relevant quantitative genetic concepts are needed to understand the evolution of  
 2093 polygenic traits. (A) Additive and non-additive effects at a single locus, where  $a$  is defined as the  
 2094 additive effect (also known as the average effect of allelic substitution [ $\alpha$ ] when there is no  
 2095 dominance) and  $d$  is defined as the dominance deviation. With dominance,  $\alpha = a[1 + k(p - q)]$ , where  
 2096  $k$  is the degree of dominance ( $k = 0$ : additive,  $k = 1$ : dominance,  $k > 1$ : over-dominance, see Lynch &  
 2097 Walsh 1998). (B) Polygenic traits are determined by multiple genes, each with additive (shown) and  
 2098 non-additive (not shown) effects. The total additive effect is the sum of the additive effects at all  
 2099 causative loci. (C) Additive-by-additive epistasis, where the additive effect of an allele at the PHY\_A  
 2100 SNP depends on what allele it is paired with at the RPL13 SNP. In this case, the effects can be  
 2101 thought of as dependent in the following manner using the four possible haplotypes at the PHY\_A  
 2102 (A/T SNP) and RPL13 (C/T SNP) SNPs – AC: +5, AT: -2, TC: -1, TT: 4. (D) The effect of genetic drift  
 2103 on the additive genetic variance as determined by 100 independent, causative loci. Each line  
 2104 represents a simulation of genetic drift in a constant sized population ( $n = 500$  diploids) conditioned  
 2105 on initial allele frequencies across loci ( $p_i$ ) and effect sizes ( $\alpha$ ). The expected mean across all 100  
 2106 simulations is given by the dashed black line. Any given simulation can deviate strongly from this  
 2107 expectation (solid black line). Thus, when the elements of  $p$  change over time, in this case due to  
 2108 genetic drift, so does the additive genetic variance. See also Supplemental Box S1.

2109 **Figure 3A**

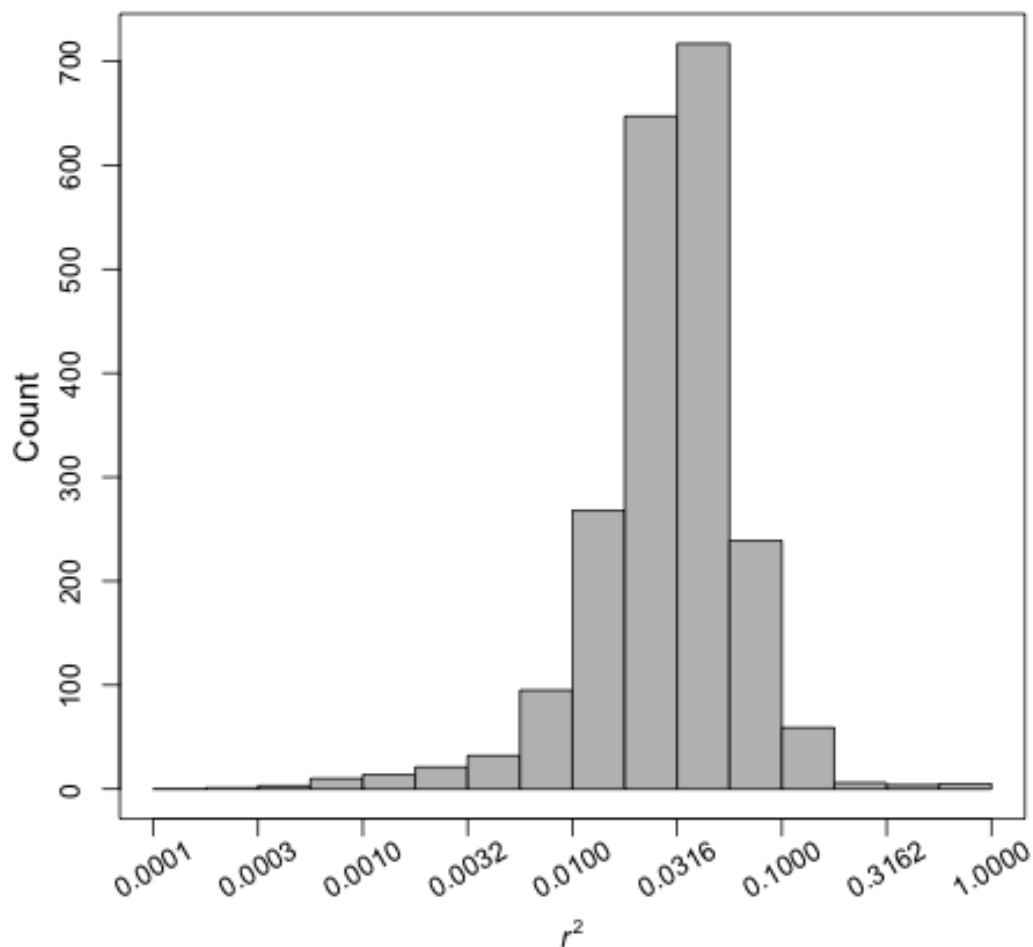

2110

2111 **Figure 3A.** Counts of per-locus percent variance explained ( $r^2$ ) estimates from single-locus

2112 genotype-phenotype associations from literature review. Note logarithmic x-axis.

2113 **Figure 3B**

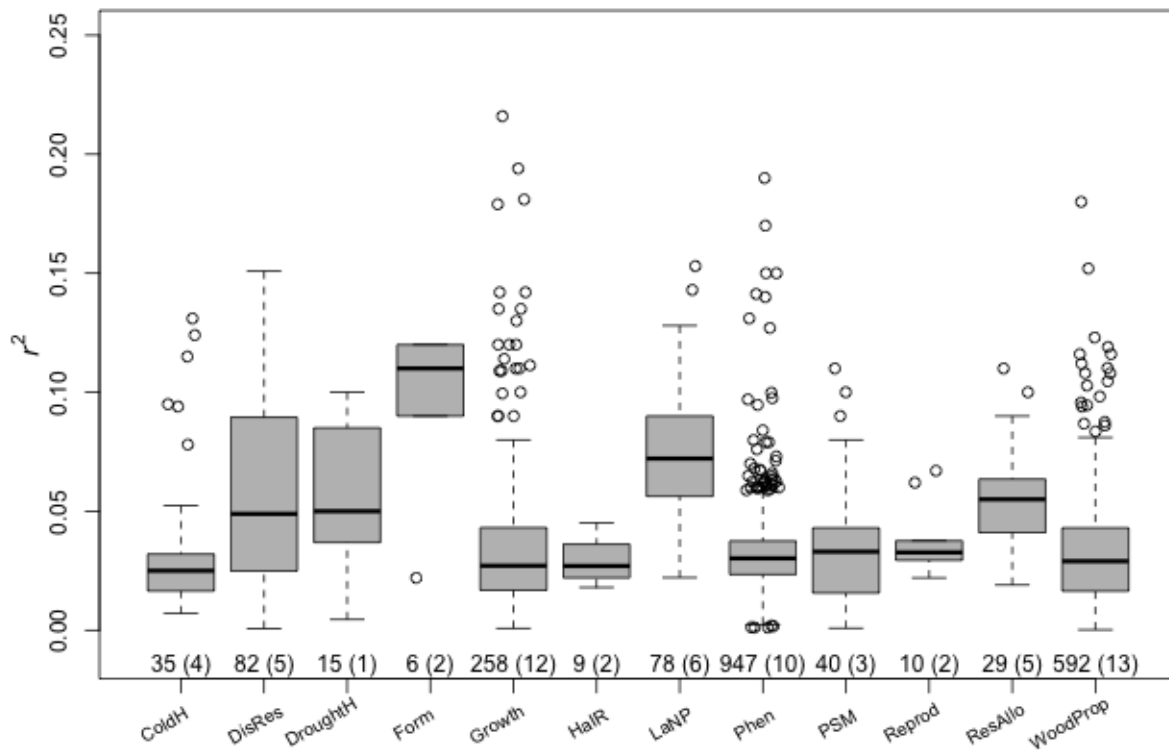

2114  
2115 **Figure 3B.** Distribution of per-locus percent variance explained ( $r^2$ ) values for trait groups  
2116 within genotype-phenotype literature review. Values along x-axis are total number of estimates  
2117 and number of species across estimates. Not shown are nine outliers for disease resistance to  
2118 *Cronartium ribicola* in *Pinus monticola* (range = [0.402, 1.0]) from Lui *et al.* 2017.  
2119 Abbreviations as in Figure 1.



## 2120 **Tables**

2121 **Table 1.** Where to next? The Path Forward identifies meaningful ways in which we can progress  
2122 our understanding of the architecture underlying complex traits in trees. Here we outline some  
2123 questions that can be used to guide future inquiry as the number of markers and sequence  
2124 length increase, and annotation becomes more precise and specific to tree biology.

- 2125
- 2126 1) Composition and evolution of architectures
    - 2127 a. How prevalent are non-additive contributions to underlying genetic architectures?  
2128 Are there patterns across similar phenotypes or regulatory networks? Is there  
2129 evidence that such non-additive effects have constrained or facilitated local  
2130 adaptation?
    - 2131 b. Are adaptive loci most prevalent in areas of low recombination or repetitive  
2132 sequences (e.g., retrotransposons, clustered gene families)? Are loci of similar  
2133 effect sizes or expression profiles clustered within the genome?
    - 2134 c. At what frequency does local adaptation result in fitness tradeoffs across  
2135 environments (Tiffin & Ross-Ibarra 2014; Wadgyman et al. 2017)? And does this  
2136 interact with demographic history in trees?
    - 2137 d. Does pleiotropy play a substantial role in underlying tree architectures?
    - 2138 e. Which aspects of genetic architectures in trees are likely to exhibit deleterious  
2139 variation? And how much of this signal are we capturing in genotype-phenotype  
2140 applications?
  - 2141 2) Repetitiveness of architectural organization
    - 2142 a. Should we expect genome organization to vary across populations?
    - 2143 b. Under what situations in trees are we likely to observe genomic reorganization  
2144 (e.g., physical linkage or dispersion) due to selection pressures (Lotterhos et al.  
2145 2017)? Will reference genomes be suitable to assess this question across  
2146 species or diverged populations, or can long-read sequencing technologies  
2147 (reviewed in Jiao & Schneeberger 2017) offer appropriate resources?
    - 2148 c. At what level of the genetic architecture do we see patterns of convergence,  
2149 parallelism, and divergence? Within core hubs, or perhaps within aspects of the  
2150 periphery? What does the comparison of topologies from such architectures tell  
2151 us about influential evolutionary processes?
    - 2152 d. What is the prevalence of convergent and parallel adaptation within polygenic  
2153 architectures across populations and species?
    - 2154 e. How often are architectures influenced by variation in expression levels rather  
2155 than structural variation in proteins? Do architectures differ in predictable ways  
2156 with the prevalence of one or the other?

## 2157 **Boxes**

### 2158 **Box 1: A step in the right direction: Synergism between GWAS and Genomic Selection**

2159

2160 Early simulations showcased the promise of predicting breeding values from marker data to  
2161 accelerate domestication and breeding of plants and animals (Meuwissen et al. 2001; Bernardo &  
2162 Yu 2007; Heffner et al. 2009; Zhong et al. 2009), and particularly under the framework of  
2163 genomic selection (GS) in trees (Wong & Bernardo 2008; Grattapaglia & Resende 2011; Iwata et  
2164 al. 2011; defined and reviewed by Grattapaglia 2017). Much of the early exploration into the  
2165 applicability of GS in trees discounted the utility of marker-assisted selection (MAS) because of  
2166 the small estimated effects for the few loci significantly associated via single-locus approaches at  
2167 the time, as well as having concerns related to replication because of the identification of  
2168 markers across limited parental (genetic) backgrounds (Grattapaglia & Resende 2011; Iwata et  
2169 al. 2011; Resende et al. 2012a, 2012b). Based on these arguments and results from simulations,  
2170 genomic selection was identified as a more promising endeavor than MAS, particularly if the  
2171 breeding cycle can be reduced via efforts such as grafting (Grattapaglia & Resende 2011) or  
2172 somatic embryogenesis (Resende et al. 2012a).

2173

2174 While GS techniques often can explain a considerable proportion of narrow sense heritability,  
2175 current implementation of GS in trees is often on par with, or marginally better than, traditional  
2176 phenotypic selection when evaluating potential within the same generation and environment (see  
2177 Table 9.1 in Grattapaglia 2017). Further, the predictive accuracy of various models are a function  
2178 of underlying architecture (Resende et al. 2012c; Grattapaglia 2017). As pointed out by  
2179 Grattapaglia (2017), current marker densities have produced satisfactory results due to the  
2180 capture of relatedness between training and validation populations. Here, this success is likely  
2181 due to the ability of markers to reasonably represent large haplotype blocks (and thus cumulative  
2182 action of causative effects) due to the high level of relatedness between training and validation  
2183 populations. Even so, Grattapaglia (2017) recommends higher marker densities so that markers  
2184 also capture true marker-QTL LD and thus sustain long-term accuracies across generations and  
2185 environments. We also believe GWAS applications (*sensu lato*) in trees will also see  
2186 improvements through increased marker densities, the results of which can then be used to  
2187 further test specific hypotheses regarding underlying architectures and to increase predictive  
2188 accuracies of GS as well. Incorporating markers that putatively underlie the trait of interest into  
2189 model prediction may spur opportunities that do not require high degrees of relatedness between  
2190 training and validation populations, perhaps to the extent of incorporating material from outbred  
2191 stands using predictive approaches (*sensu* Bérénos et al. 2014; Bontemps 2016) and heritability  
2192 validation (*sensu* Castellanos et al. 2015) in the field.

2193

2194 In the end, the realized progress of our understanding regarding the genomics of complex traits  
2195 in trees will therefore be enhanced by the deposition of data from both GS and GWAS  
2196 approaches into a centralized open-access database hub such as TreeGenes (treegenesdb.org).  
2197 Future meta-analyses can then synthesize past inquiry to summarize our current understanding of  
2198 underlying genetic architectures, ultimately incorporating this knowledge towards future  
2199 applications in industry and conservation (see The Path Forward; Table 1).

2200

## Supplemental Information

2201

# The genomics of local adaptation in trees:

2202

# Are we out of the woods yet?

2203

Brandon M. Lind\*, Mitra Menon\*, Connie E. Bolte\*<sup>†</sup>,

2204

Trevor M. Faske<sup>†</sup>, and Andrew J. Eckert<sup>†</sup>

2205

\*Integrative Life Sciences, Virginia Commonwealth University, Richmond, Virginia 23284 USA

2206

<sup>†</sup>Department of Biology, Virginia Commonwealth University, Richmond, Virginia 23284 USA

2207

**Running Title:** Are we out of the woods yet?

2208 **Supplemental Figures**

2209 **Figure S1**

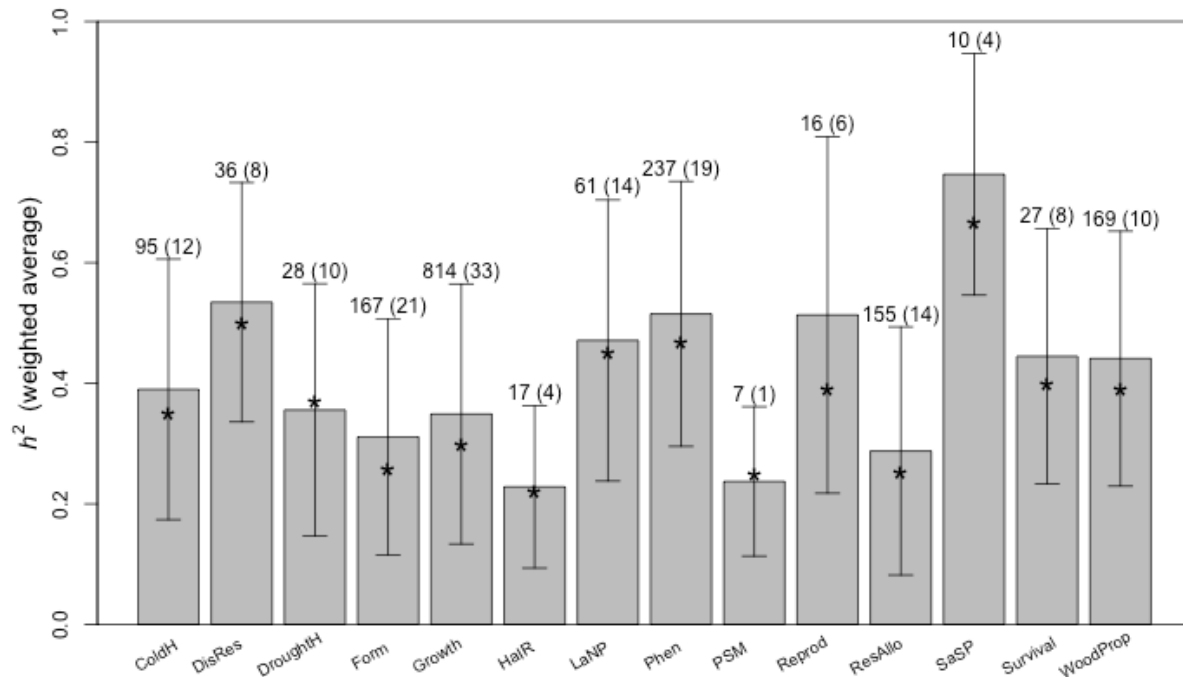

2210 **Figure S1.** Averages of narrow sense heritability calculated by weighting the number of families  
2211 used in each estimate of heritability. Error bars represent the standard deviation of the weighted  
2212 averages. Note that genetic variances in juvenile traits may be inflated due to instances of  
2213 maternal effects, which we did not control for in our literature survey. Abbreviations as in Figure  
2214 1 of the main text.  
2215

2216 **Figure S2**

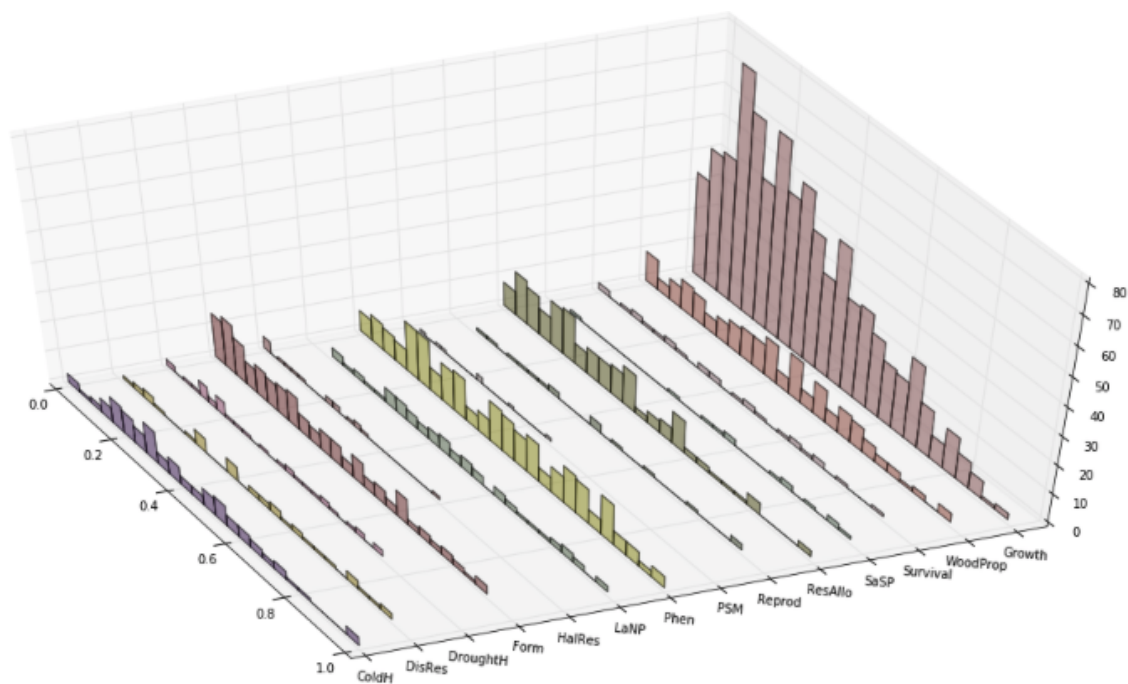

2217  
2218

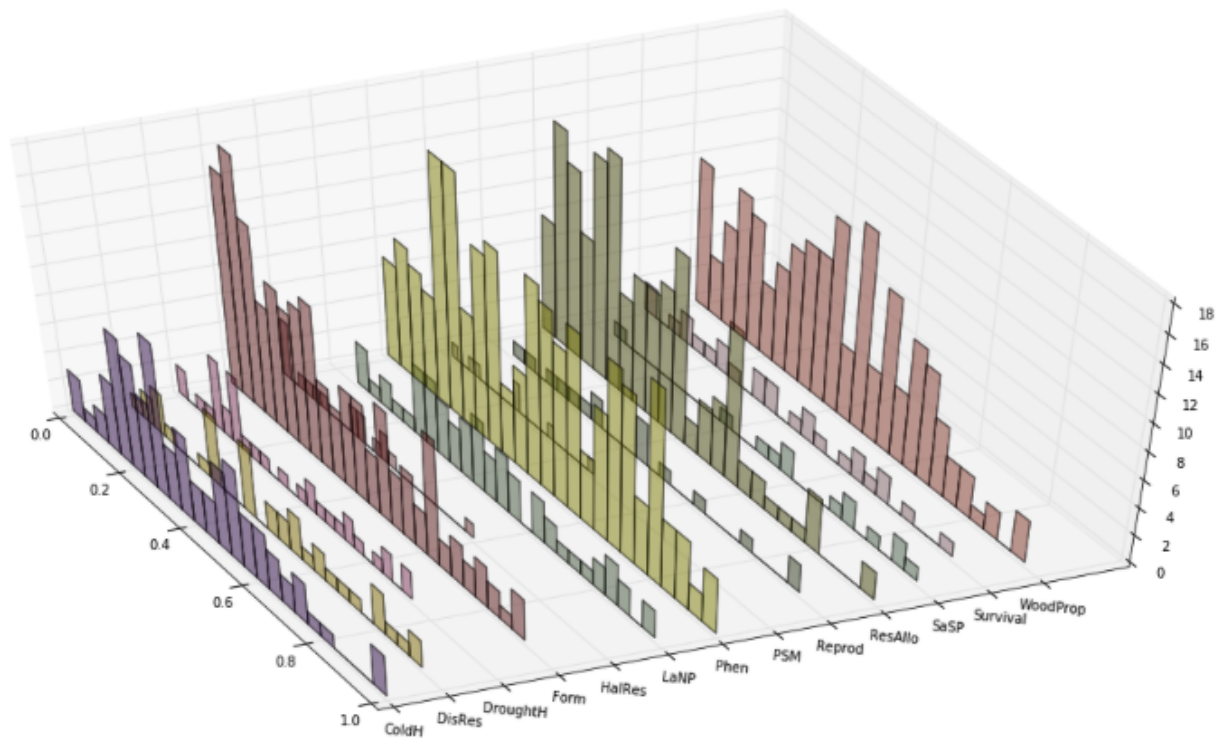

2219 **Figure S1.** Distributions of unweighted narrow sense heritability with (A) and without (B)  
2220 inclusion of the Growth distribution. Trait abbreviations as in Figure 1 of the main text.  
2221

2222 **Figure S3**

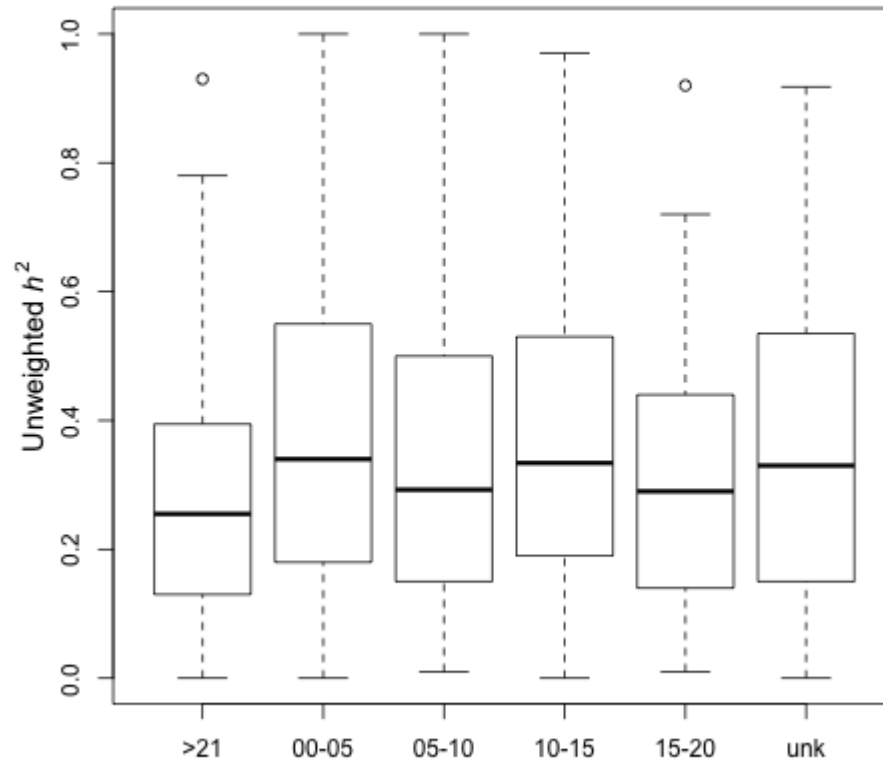

2223

2224 **Figure S2.** Unweighted narrow sense heritability distributions by age (years). Unk = unknown

2225 age (i.e., not specified by article).

2226 **Figure S4**

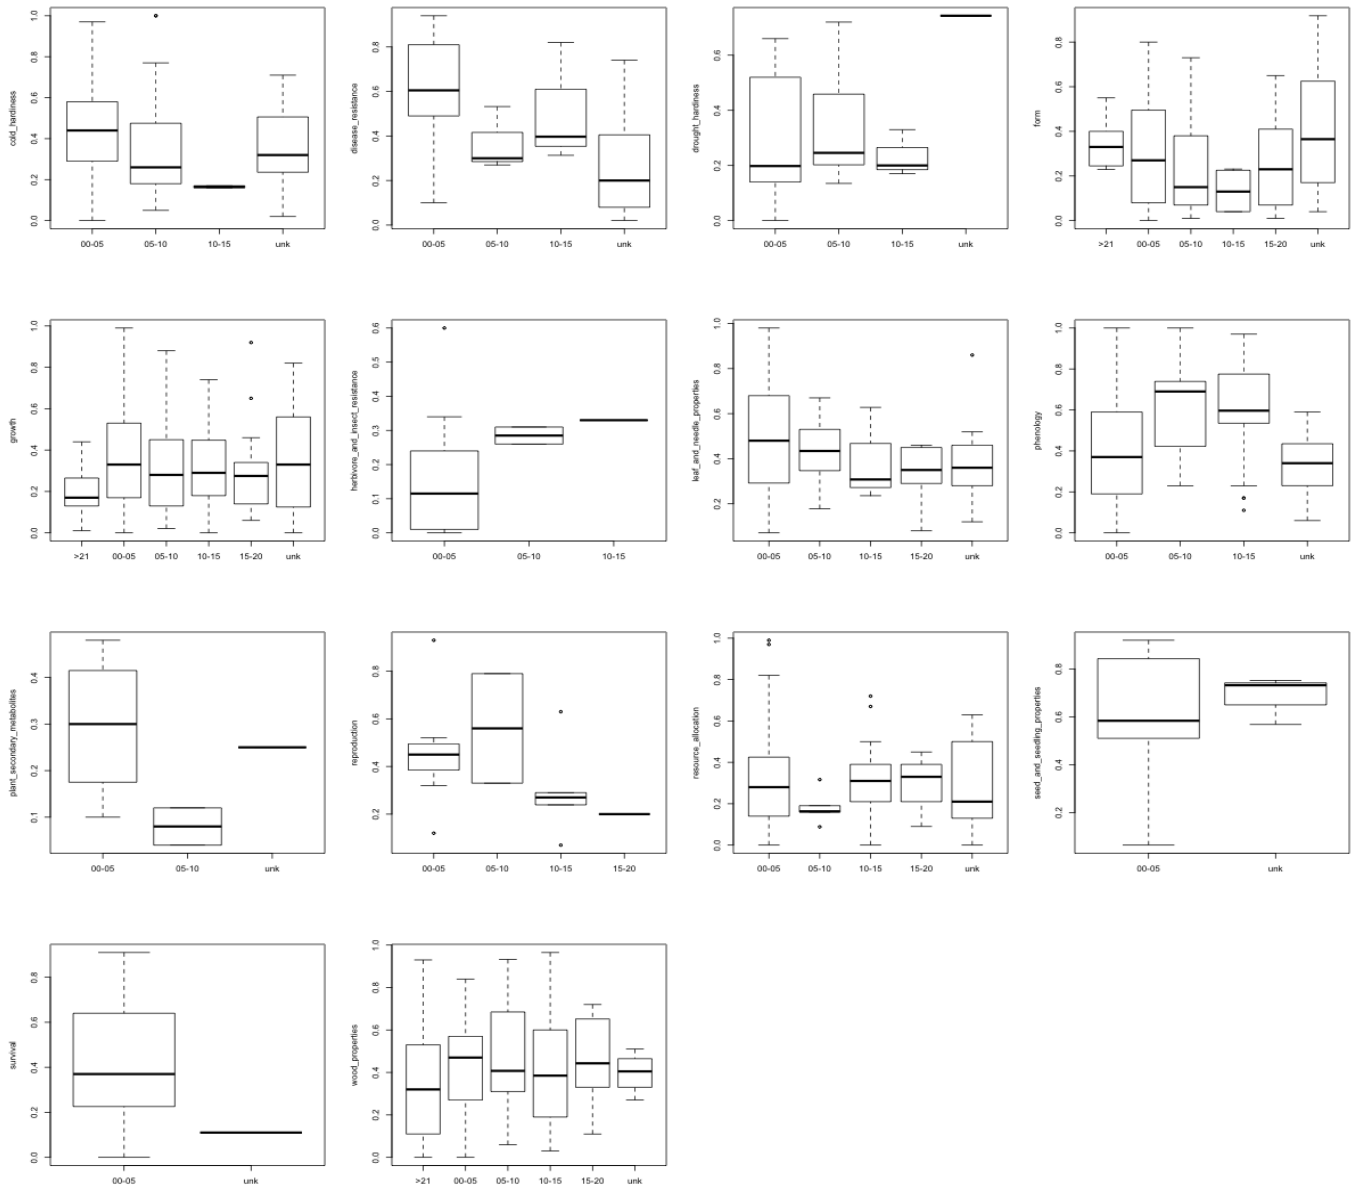

2227  
2228 **Figure S3.** Unweighted narrow sense heritability distributions by age (years) and by trait  
2229 category. Unk = unknown (i.e., not specified by article)

2230 **Figure S5**

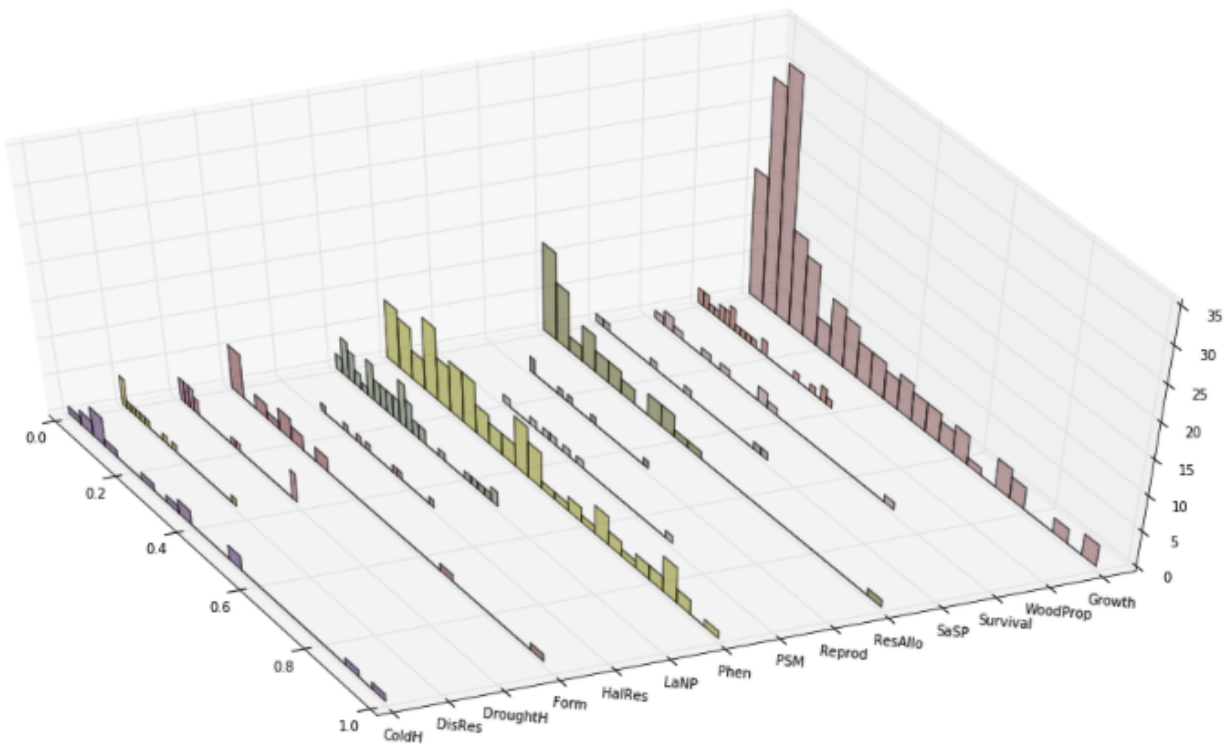

2231  
2232 **Figure S4.** Distributions of unweighted QST estimates from literature survey. Abbreviations as  
2233 in Figure 1 of the main text.



## 2234 Supplemental Tables

### 2235 Table S1

| Trait Group                     | Total measurements | Total species | Angiosperm meas. | Gymnosperm meas. | Eucalypt meas. | Pine meas. | Populus meas. |
|---------------------------------|--------------------|---------------|------------------|------------------|----------------|------------|---------------|
| Cold hardiness                  | 16                 | 5             | 3                | 13               | 0              | 10         | 2             |
| Disease resistance              | 12                 | 3             | 3                | 9                | 0              | 9          | 3             |
| Drought hardiness               | 11                 | 5             | 5                | 6                | 0              | 3          | 4             |
| Form                            | 18                 | 6             | 15               | 3                | 1              | 3          | 12            |
| Growth                          | 170                | 25            | 73               | 97               | 13             | 74         | 44            |
| Herbivore and insect resistance | 7                  | 2             | 7                | 0                | 6              | 0          | 0             |
| Leaf and needle properties      | 52                 | 14            | 44               | 8                | 11             | 5          | 12            |
| Phenology                       | 91                 | 9             | 63               | 28               | 0              | 16         | 53            |
| Plant secondary metabolites     | 7                  | 1             | 7                | 0                | 7              | 0          | 0             |
| Reproduction                    | 6                  | 2             | 2                | 4                | 2              | 4          | 0             |
| Resource allocation             | 40                 | 10            | 16               | 24               | 3              | 22         | 10            |
| Seed and seedling properties    | 6                  | 3             | 2                | 4                | 0              | 0          | 0             |
| Survival                        | 10                 | 5             | 2                | 8                | 2              | 8          | 0             |
| Wood properties                 | 23                 | 8             | 14               | 9                | 8              | 4          | 5             |

2236 **Table S1.** Summary of total and per-species measurements used in literature review of  
 2237 differentiation of quantitative genetic variation ( $Q_{ST}$ ). The Total Species column is the number of  
 2238 unique species in our survey, whereas the remaining columns provide the total number of  
 2239 measurements per category.

2240 **Table S2**

| trait Group                     | Total measurements | Total species | Angiosperm measurements | Gymnosperm measurements | Eucalypt meas. | Pine meas. | Populus meas. |
|---------------------------------|--------------------|---------------|-------------------------|-------------------------|----------------|------------|---------------|
| old hardiness                   | 35                 | 4             | 2                       | 33                      | 0              | 0          | 2             |
| disease resistance              | 82                 | 5             | 31                      | 51                      | 0              | 51         | 30            |
| drought hardiness               | 15                 | 1             | 0                       | 15                      | 0              | 15         | 0             |
| form                            | 10                 | 3             | 4                       | 6                       | 0              | 5          | 4             |
| growth                          | 258                | 12            | 205                     | 53                      | 44             | 17         | 152           |
| herbivore and insect resistance | 9                  | 2             | 9                       | 0                       | 6              | 0          | 3             |
| leaf and needle properties      | 78                 | 6             | 58                      | 20                      | 0              | 5          | 45            |
| phenology                       | 947                | 10            | 886                     | 61                      | 0              | 0          | 846           |
| plant secondary metabolites     | 52                 | 3             | 32                      | 20                      | 29             | 20         | 3             |
| reproduction                    | 10                 | 2             | 0                       | 10                      | 0              | 9          | 0             |
| resource allocation             | 29                 | 5             | 19                      | 10                      | 4              | 8          | 15            |
| wood properties                 | 588                | 12            | 410                     | 178                     | 94             | 136        | 312           |

2241 **Table S2.** Summary of total and per-species measurements used in literature review of percent  
 2242 phenotypic variance explained by associated markers ( $r^2$ ). The Total Species column is the  
 2243 number of unique species in our survey, whereas the remaining columns provide the total  
 2244 number of measurements per category.

## 2245 Boxes

### 2246 Supplemental Box S1: Basic Concepts from Quantitative Genetics

2247 We follow the traditional decomposition of phenotypes into genetic and environmental components, which  
2248 forms the basis of quantitative genetics (Fisher 1918, Lynch & Walsh 1998, Charlesworth & Charlesworth  
2249 2010, reviewed by Hill 2010). The phenotype of an individual (P) can be decomposed into effects from its  
2250 genotype (G), its environment (E), and the interaction between its genotype and environment (GxE).  
2251 Typically, this is thought of as deviations from the population mean, with each causative locus having two  
2252 alleles. Using this framework, phenotypic variance ( $\sigma^2_P$ ) can be decomposed into genotypic variance  
2253 ( $\sigma^2_G$ ), environmental variance ( $\sigma^2_E$ ) and the variance due to the interaction between genotypes and  
2254 environments ( $\sigma^2_{GxE}$ ):

$$\sigma^2_P = \sigma^2_G + \sigma^2_E + \sigma^2_{GxE}$$

2255 For a single locus,  $\sigma^2_G$  can be decomposed into variances arising from additive ( $\sigma^2_A$ ) and dominance ( $\sigma^2_D$ )  
2256 effects (Fig. 1). For multiple loci,  $\sigma^2_G$  can be decomposed into variances arising from additive, dominance,  
2257 and epistatic ( $\sigma^2_I$ ) effects, with the total additive effect across loci being the summation of the effects at  
2258 each of the causative loci. Dominance and epistatic effects are jointly termed non-additive effects. Thus,  
2259 the previous equation can be expanded to the following:

$$\sigma^2_P = \sigma^2_A + \sigma^2_D + \sigma^2_I + \sigma^2_E + \sigma^2_{GxE}$$

2260 The decomposition of  $\sigma^2_G$  into different types of effects provides a way of estimating narrow-sense  
2261 heritability ( $h^2$ ), which is defined as the ratio of additive genetic variance ( $\sigma^2_A$ ) to total phenotypic variance  
2262 ( $\sigma^2_P$ ). For tree populations, this is often accomplished through variance partitioning techniques  
2263 (Namkoong 1979) using half-sib designs in common gardens (White *et al.* 2007) or using molecular  
2264 markers to estimate relatedness in the field (cf. Ritland & Ritland 1996). In the case of half-sib designs, if  
2265 the assumptions of free recombination and little epistasis among causative loci, random mating, and lack  
2266 of environmental covariance among sibs are satisfied,  $\sigma^2_A$  is given by (Lynch & Walsh 1998):

$$\sigma^2_A = 4\sigma^2_F$$

2267 where  $\sigma^2_F$  is the variance due to family (e.g., as extracted from a linear mixed model). Hence, for a half-  
2268 sib design,  $h^2 = 4\sigma^2_F/\sigma^2_P$ . Other sibling designs are possible, with the 4 in the previous equation replaced  
2269 by  $1/r$ , where  $r$  is the coefficient of relationship (e.g., Whitlock & Gilbert 2012). Clonal and controlled  
2270 mating designs are also often used for estimation of heritability, often broad-sense heritability (Namkoong  
2271 1979; White *et al.* 2007). When families are nested into populations, and an estimate of the among  
2272 population variance component is made, these are the components also used to estimate  $Q_{ST}$  (Spize  
2273 1993; Prout & Barker 1993). When compared against estimates of  $F_{ST}$  using a similar variance  
2274 decomposition procedure (e.g., Yang 1998) and a method suitable to account for the substantial variance  
2275 associated with these components (e.g., Whitlock & Guillaume 2009) conclusions about local adaptation  
2276 can be reached.

2277 Heritability estimates are population, environment, and time specific, as evidenced by the relationship  
2278 between  $\sigma^2_A$  and allele frequencies within populations (Lynch & Walsh 1998; e.g. Berg & Coop 2014):

$$\sigma^2_A = 2 \sum_{i=1}^L \alpha_i^2 p_i (1 - p_i)$$

2291 where the summation is over the number of causative loci ( $L$ ),  $\alpha$  is the average effect of allelic substitution  
2292 at each locus (Fig. 1), and  $p_i$  is the frequency of one of the alleles at each of the causative loci. Thus, any  
2293 evolutionary force altering  $p$  at some or all of the causative loci will change  $\sigma^2_A$  (cf. Box 3.7 in  
2294 Charlesworth & Charlesworth 2010). Heritability is also uninformative about the underlying architecture  
2295 itself, as are the relative magnitudes of the different variance components themselves (Huang & Mackay  
2296 2016), and can often be misleading about evolutionary potential (Hansen *et al.* 2011).

2299 **Supplemental Box S2:**

2300 *Brief introduction to methods for single-locus genetic association analysis*

2301  
2302 Detecting associations between genetic markers and complex trait variation relies on fitting and  
2303 evaluating linear models, typically of the form:

$$\mathbf{y} = \mathbf{X}\boldsymbol{\beta} + \mathbf{Z}\mathbf{u} + \mathbf{e},$$

2304  
2305  
2306 where  $\mathbf{y}$  is a vector of observed or inferred phenotypic values,  $\boldsymbol{\beta}$  and  $\mathbf{u}$  are vectors of random and fixed  
2307 effects, respectively,  $\mathbf{X}$  and  $\mathbf{Z}$  are design matrices associated with  $\boldsymbol{\beta}$  and  $\mathbf{u}$ , and  $\mathbf{e}$  is a vector of residuals  
2308 (Yu *et al.* 2005). In the simplest model, the phenotype ( $\mathbf{y}$ ) is modeled as a function of genetic effects at a  
2309 single locus, represented by marker genotypes for the samples comprising values in  $\mathbf{y}$ , and covariates  
2310 describing relatedness among sampled trees and the structure among populations from which those trees  
2311 were sampled. Genetic effects are encoded based on *a priori* assumptions about the underlying  
2312 architecture of the phenotypic trait under consideration, with the most frequent encoding being that for  
2313 additive effects (e.g., counts of a reference allele) considered as either fixed or random effects (Goddard  
2314 *et al.* 2009). Phenotypic values are often estimates derived through analysis of materials established  
2315 within common gardens, either from clones or sibships, from which estimates of the genetic values of  
2316 unmeasured trees (e.g., maternal trees for which markers have been genotyped) are made using the  
2317 theory of Best Linear Unbiased Predictors (BLUPs; Henderson 1975; Searle *et al.* 1992; Piepho *et al.*  
2318 2008). Inclusion of only fixed effects results in a General Linear Model (GLM), whereas a mixture of fixed  
2319 and random effects results in a Mixed Linear Model (MLM or LMM). The use of covariates is necessary to  
2320 avoid identification of false positive associations arising from the confounding between neutral genetic  
2321 and phenotypic variation due to demographic history and the analysis of relatives (Devlin & Roeder 1999;  
2322 Yu *et al.* 2005; Price *et al.* 2006).

2323  
2324 Models as described above are typically fitted and evaluated using restricted maximum likelihood (REML,  
2325 Patterson & Thompson 1971), although Bayesian methods are available and have the advantage of  
2326 specifying *a priori* assumptions more clearly, remove the distinction between fixed and random effects,  
2327 and are more applicable to testing biologically realistic models (Stephens & Balding 2009). Output from  
2328 these models include estimates of effect sizes for markers (e.g.  $r^2$ , coefficients for random effects,  
2329 genotypic trait means) and, when used in a frequentist framework, probability values ( $p$ -values) of  
2330 observing test statistics under a null model. Bayesian methods, in contrast, provide strength of evidence  
2331 measures such as Bayes Factors for the association of each marker to the phenotype of interest. The  
2332 ability to discover and correctly quantify effect sizes of true positives (i.e. causative markers or indirect  
2333 associations resulting from linkage to causative markers) is dependent upon experimental design,  
2334 including design of genotyping assays, and sample sizes (Long & Langley 1999; Zöllner and Pritchard  
2335 2007; Spencer *et al.* 2009), as well as genome-wide patterns of linkage disequilibrium relative to the  
2336 density of markers in the genome, the genetic distance between the indirectly associated marker and the  
2337 causative locus, and the true underlying genetic architecture of the phenotypic trait under consideration  
2338 (Platt *et al.* 2010; Prichard *et al.* 2010; Caballero *et al.* 2015).

2339  
2340 One model is typically fitted and evaluated per marker-phenotypic trait combination (but see e.g. Wegrzyn  
2341 *et al.* 2010 for haplotype analysis). Even without the issue of confounding described above, this increases  
2342 the likelihood of false positives arising solely from performing many statistical tests. A variety of methods  
2343 exist to deal with multiple testing, with the most popular methods being those based on the false  
2344 discovery rate (Storey & Tibshirani 2003) and permutation (Hirschhorn & Daly 2005). Additional methods  
2345 exist for situations where the multiple tests are not independent from one another (e.g. linkage  
2346 disequilibrium among markers, see Johnson *et al.* 2010) or when permutation analysis is problematic  
2347 (Joo *et al.* 2016).

## 2349 Supplemental References

- 2350 Caballero A, Tenesa A, Keightley PD (2015) The nature of genetic variation for complex traits  
2351 revealed by GWAS and regional heritability mapping analyses. *Genetics* 201:1601-1613.
- 2352 Devlin B, Roeder K (1999) Genomic control for association studies. *Biometrics* 55:997-1004.
- 2353 Goddard ME, Wray NR, Verbyla K, Visscher PM (2009) Estimating effects and making  
2354 predictions from genome-wide marker data. *Statistical Science* 24:517-529.
- 2355 Henderson CR (1975) Best linear unbiased estimation and prediction under a selection model.  
2356 *Biometrics* 31:423-447.
- 2357 Hirschhorn JN, Daly MJ (2005) Genome-wide association studies for common diseases and  
2358 complex traits. *Nature Reviews Genetics* 6:95-108.
- 2359 Johnson RC, Nelson GW, Troyer JL, et al (2010) Accounting for multiple comparisons in a  
2360 genome-wide association study (GWAS). *BMC Genomics* 11:724.
- 2361 Joo JWJ, Hormozdiari F, Han B, Eskin E (2016) Multiple testing correction in linear mixed  
2362 models. *Genome Biology* 17:62.
- 2363 Long AD, Langley CH (1999) The power of association studies to detect the contribution of  
2364 candidate genetic loci to variation in complex traits. *Genome Research* 9:720-731.
- 2365 Patterson HD, Thompson R (1971) Recovery of interblock information when block sizes are  
2366 unequal. *Biometrika* 58:545-554.
- 2367 Piepho HP, Möhring J, Melchinger AE, Büchse A (2008) BLUP for phenotypic selection in plant  
2368 breeding and variety testing. *Euphytica* 161:209-228.
- 2369 Platt A, Vilhjalmsón BJ, Nordborg M (2010) Conditions under which genome-wide association  
2370 studies will be positively misleading. *Genetics* 186:1045-1052.
- 2371 Price AL, Patterson NJ, Plenge RM, Weinblatt ME, Shadick NA, Reich D (2006) Principal  
2372 components analysis corrects for stratification in genome-wide association studies. *Nature*  
2373 *Genetics* 38:904-909.
- 2374 Pritchard JK, Pickrell JK, Coop G (2010) The Genetics of Human Adaptation: Hard Review  
2375 Sweeps, Soft Sweeps, and Polygenic Adaptation. *Current Biology* 20:R208–R215. doi:  
2376 10.1016/j.cub.2009.11.055
- 2377 Searle SR, Casella G, McCulloch CE (1992) *Variance Components*. New York, NY: John Wiley  
2378 & Sons, Inc. 528 pp.

- 2379 Spencer CCA, Su Z, Donnelly P, Marchini J (2009) Designing genome-wide association studies:  
2380 sample size, power, imputation, and the choice of genotyping chip. PLoS Genetics  
2381 5:e1000477.
- 2382 Stephens M, Balding DJ (2009) Bayesian statistical methods for genetic association studies.  
2383 Nature Reviews Genetics 10:681-690.
- 2384 Storey JD, Tibshirani R (2003) Statistical significance for genomewide studies. Proceedings of  
2385 the National Academy of Sciences of the United States of America 100:9440-9445.
- 2386 Wegrzyn JL, Eckert AJ, Choi M, et al (2010) Association genetics of traits controlling lignin and  
2387 cellulose biosynthesis in black cottonwood (*Populus trichocarpa*, Salicaceae) secondary  
2388 xylem. New Phytologist 188:515–532. doi: 10.1111/j.1469-8137.2010.03415.x
- 2389 Yu J, Pressoir G, Briggs WH, Vroh Bi I, Yamasaki M et al. (2005) A unified mixed-model  
2390 method for association mapping that accounts for multiple levels of relatedness. Nature  
2391 Genetics 38:203-208.
- 2392 Zöllner S, Pritchard JK (2007) Overcoming the Winner’s Curse: Estimating Penetrance  
2393 Parameters from Case-Control Data. The American Journal of Human Genetics 80:605–615.
